1                   **Characterisation of the Ubiquitin-ESCRT pathway in Asgard archaea sheds new light on**  
2                   **origins of membrane trafficking in eukaryotes**  
3  
4  
5

6           Tomoyuki Hatano<sup>1</sup>, Saravanan Palani<sup>1\*</sup>, Dimitra Papatziadou<sup>2\*</sup>, Diorge P. Souza<sup>3\*</sup>, Ralf Salzer<sup>3\*</sup>,  
7 Daniel Tamarit<sup>4, 5\*</sup>, Mehul Makwana<sup>2</sup>, Antonia Potter<sup>2</sup>, Alexandra Haig<sup>2</sup>, Wenjue Xu<sup>2</sup>, David Townsend<sup>6</sup>,  
8 David Rochester<sup>6</sup>, Dom Bellini<sup>3</sup>, Hamdi M. A. Hussain<sup>1</sup>, Thijs Ettema<sup>4</sup>, Jan Löwe<sup>3</sup>, Buzz Baum<sup>3§</sup>,  
9                   Nicholas P. Robinson<sup>2§</sup>, Mohan Balasubramanian<sup>1§</sup>

10  
11  
12  
13 <sup>1</sup> Centre for Mechanochemical Cell Biology, Division of Biomedical Sciences, Warwick Medical School,  
14 University of Warwick, Coventry CV4 7AL, United Kingdom

15 <sup>2</sup> Division of Biomedical and Life Sciences, Faculty of Health and Medicine, Lancaster University,  
16 Lancaster LA1 4YG, United Kingdom

17 <sup>3</sup> MRC Laboratory of Molecular Biology, Cambridge CB2 0QH, United Kingdom

18 <sup>4</sup> Laboratory of Microbiology, Department of Agrotechnology and Food Sciences, Wageningen  
19 University, Wageningen 6708 WE, the Netherlands

20 <sup>5</sup> Department of Aquatic Sciences and Assessment, Swedish University of Agricultural Sciences, SE-  
21 75007 Uppsala, Sweden

22 <sup>6</sup> Department of Chemistry, Lancaster University, Lancaster LA1 4YB, United Kingdom

23  
24  
25 \*These authors contributed equally to this work and are listed alphabetically

26  
27  
28  
29 § Correspondence to Mohan Balasubramanian- [M.K.Balasubramanian@warwick.ac.uk](mailto:M.K.Balasubramanian@warwick.ac.uk); Nick  
30 Robinson- [n.robinson2@lancaster.ac.uk](mailto:n.robinson2@lancaster.ac.uk) ; Buzz Baum- [bbaum@mrc-lmb.cam.ac.uk](mailto:bbaum@mrc-lmb.cam.ac.uk)  
31  
32  
33  
34

## SUMMARY

The ESCRT machinery performs a critical role in membrane remodelling events in all eukaryotic cells, including in membrane trafficking, membrane repair, cytokinetic abscission, in viral egress, and in the generation of extracellular vesicles. While the machinery is complex in modern day eukaryotes, where it comprises dozens of proteins, the system has simpler and more ancient origins. Indeed, homologues of ESCRT-III and the Vps4 ATPase, the proteins that execute the final membrane scission reaction, play analogous roles in cytokinesis and potentially in extracellular vesicle formation in TACK archaea where ESCRT-I and II homologues seem to be absent. Here, we explore the phylogeny, structure, and biochemistry of homologues of the ESCRT machinery and the associated ubiquitylation system found in genome assemblies of the recently discovered Asgard archaea. In these closest living prokaryotic relatives of eukaryotes, we provide evidence for the ESCRT-I and II sub-complexes being involved in the ubiquitin-directed recruitment of ESCRT-III, as it is in eukaryotes. This analysis suggests a pre-eukaryotic origin for the Ub-coupled ESCRT system and a likely path of ESCRT evolution via a series of gene duplication and diversification events.

## INTRODUCTION

The ESCRT (Endosomal Sorting Complex Required for Transport) machinery is composed of several protein complexes and associated accessory proteins, including the ESCRT-0, -I, -II, -III subcomplexes, Vps4, and ALIX/Bro1<sup>1-18</sup> (Figure S1). These proteins act in sequence to bind, deform and cut membranes during membrane trafficking<sup>2-5</sup>, cell division<sup>19,20</sup>, viral egress<sup>21,22</sup> and in other important topologically similar membrane remodelling events in eukaryotes<sup>23-39</sup>. When driving the formation of multivesicular bodies (MVBs), where the role of ESCRT in trafficking has been best characterised, the ESCRT machinery is recruited to endosomal membranes by ubiquitylated transmembrane proteins that are targeted to vesicles<sup>40</sup>. The ubiquitin (Ub) moiety is recognised by ESCRT-0 and -I subcomplexes, which bind the ubiquitin  $\beta$ -grasp fold<sup>9,14,41,42</sup>. ESCRT-I proteins together with the ESCRT-II sub-complex then corral these ubiquitylated transmembrane proteins into membrane domains<sup>9,11</sup>. Finally, the ESCRT-II sub-complex nucleates the local formation of ESCRT-III co-polymers which, through action of the Vps4 ATPase, undergo structural changes to drive membrane invagination and scission to release vesicles containing the Ub-marked transmembrane proteins<sup>43-53</sup>.

ESCRT-I, -II, -III components are found conserved across the eukaryotic lineages, pointing to this machinery being present in the last eukaryotic common ancestor (LECA; Note ESCRT-0 is only encountered in Opisthokonta)<sup>54</sup>. Homologues of ESCRT-III and Vps4 are coded by the genomes of many archaeal species<sup>55-60</sup>, and shown to function in archaeal membrane remodelling during cytokinesis and virus release. More recently, PspA and Vipp1 have been recognized as bacterial ESCRT-III related proteins<sup>61-63</sup>. These observations suggest that a subset of ESCRT components have more ancient evolutionary origins. Furthermore, the identification of a full complement of ubiquitin and its activating enzymes (E1, E2, and E3) in some archaeal species has provided evidence for ubiquitylation cascades functioning in protein degradation in the archaeal ancestors of eukaryotes<sup>58,64,65</sup>.

This begs the question: when in evolution did ESCRT-I and ESCRT-II machineries arise, and when was ubiquitylation co-opted to regulate ESCRT? Metagenome assemblies of the recently discovered Asgard archaea, the closest living relatives of eukaryotes, have revealed that homologues of the entire ubiquitylation cascade, ESCRT-III (and Vps4), and components of the ESCRT-I and ESCRT-II subcomplexes are all encoded by the genomes of these archaea<sup>57,58</sup>. However, validating this conclusion in cells is currently very difficult, as only one Asgard member has been isolated and cultured<sup>66</sup>; and its growth rate, physiology and the lack of essential tools prevent its use as a cell biological model.

To circumvent these challenges, here we apply a diverse set of experimental approaches to characterise Asgard archaeal homologues of the eukaryotic Ub-ESCRT system, focusing on the ESCRT-I and

88 ESCRT-II subcomplexes. Our analysis shows that, like its eukaryotic counterparts, the Asgard ESCRT-  
89 I subcomplex stably recognises ubiquitin. Furthermore, by carrying out a comprehensive two-hybrid  
90 analysis, we have been able to identify protein-protein interactions within and between the different  
91 ESCRT subcomplexes. Additionally, our data show that Asgard ESCRT subcomplexes have likely  
92 arisen through a process of gene duplication and diversification, prior to the evolution of more complex  
93 eukaryotic ESCRT assemblies. Taken together, this work reveals the presence of a genetically  
94 streamlined ubiquitin-associated multi-component ESCRT pathway that predates the emergence of the  
95 eukaryotic ESCRT machinery.

## 96 RESULTS

### 97 **Phylogenetic analyses indicate that Asgard archaeal genomes encode homologues of most, but** 98 **not all components of the Ub-ESCRT machinery**

102 Many of the recently discovered Asgard archaeal genomes encode a wide array of so-called 'eukaryotic  
103 signature proteins' (ESPs) and appear unique amongst prokaryotes in possessing close homologues of  
104 most of the proteins that make up the ESCRT-I and -II complexes, together with ESCRT-III and Vps4  
105 and homologues of ubiquitin and the associated ubiquitin-modification enzymes<sup>57,58</sup>. While these data  
106 suggest the possibility of some Asgard archaea possessing functional Ub-ESCRT membrane trafficking  
107 machinery, it is noticeable that Asgard genomes appear to lack a number of genes encoding proteins  
108 essential for ESCRT function in eukaryotes (Figure 1A). Thus, to put this hypothesis to the test, we  
109 began by generating a catalogue of proteins with homology to the components of the eukaryotic Ub-  
110 ESCRT pathway in distinct Asgard phyla shown in Figure 1A and Figure S2 and Figure S3.

112 We focused on Asgard archaea that have metagenomic assemblies that are near complete based on  
113 them being assigned to small numbers of contigs and on estimates of genome coverage<sup>57,58</sup>. Within  
114 such genomes, as previously described<sup>57,58</sup>, we were able to identify genes coding for close homologues  
115 of ubiquitin, ubiquitin modifying enzymes, ESCRT-I components, ESCRT-II subunits, together with  
116 homologues of ESCRT-III and Vps4 (Figure 1A and Figure S3)<sup>58,67</sup>. These analyses strongly suggest  
117 that many Asgard archaea possess a *bona fide* eukaryote-like ESCRT-system.

119 Since gene clustering in prokaryotes frequently brings together genes with common functions, we  
120 sought to determine the extent to which ubiquitylation and ESCRT related genes are found co-located  
121 within specific regions of Asgard genomes (Figure 1B and C). As previously described<sup>58</sup> within a single  
122 Odinarchaeota genome the full set of putative gene-products with homology to *Ub-ESCRT* were found  
123 together within a single gene cluster (Figure 1C). We extended this analysis by developing a simple  
124 metric of gene clustering, which was applied to Heimdall-, Loki-, Thor, and the recently described Hel-  
125 archaeotal genomes, all which harbour *ESCRT* genes<sup>57,58,67</sup>. This was achieved by measuring the  
126 fraction of genomes within each phylum in which each pair of genes co-localises within less than 10 kb  
127 (Figure 1B; white indicates no evidence of co-location and deep purple indicates full co-location)<sup>68</sup>. This  
128 analysis revealed cases where the entire set of genes was clustered together in genomes Hel and  
129 Heimdall archaea genomes, and was found organised into two relatively discrete Ub and ESCRT  
130 genomic regions in Lokiarchaeota (Figure 1B). In addition, we observed a consistent pattern of  
131 association across genomes in which the genes for ESCRT-III and Vps4 were found most tightly  
132 associated with homologues of Vps25 (Figure 1B-C, S3). This is striking as Vps25 is the subunit of the  
133 ESCRT-II complex in eukaryotes that recruits ESCRT-III to membranes, triggering vesicle budding<sup>1-18</sup>.  
134 Vps22/Vps36 homologues (ESCRT-II components) were found to have a similar but slightly less  
135 consistent pattern of co-location with ESCRT-III and Vps4, and the gene was usually closely associated  
136 with Vps25 (Figure 1B-C, S3).

138 During this analysis, we also noted that, whereas eukaryotic Vps22 and Vps25 function as part of a  
139 single hetero-tetrameric complex together with a divergent Vps22 homologue, Vps36, Asgard archaeal  
140 genomes possessed a single gene encoding a Vps22/Vps36-like protein (Figure 1A and C). A

141 phylogenetic analysis was used to confirm that the Asgard Vps22-like protein is a closer homologue of  
142 Vps22 than it is of Vps36 (Figure 1D, Figure S4). This suggests that the eukaryotic-specific protein,  
143 Vps36, arose from a Vps22/Vps36 homolog after the divergence of Vps22 and Vps25 in Asgard  
144 archaea.

145  
146 Asgard genomes also code for clear homologues of the eukaryotic ESCRT-I machinery, including  
147 homologues of Vps23 (which contain a Ubiquitin E2-Variant or “UEV” domain) and Vps28, both  
148 containing steadiness box (SB) domains. Interestingly, these genes were not tightly clustered in Asgard  
149 genomes (Figure 1B-C, Figure S5). Furthermore, the organisation of this set of genes was variable  
150 across lineages; including genomes in which individual domains were brought together to form fusion  
151 proteins (Figure 1B-C, Figure S5-8). In addition, Asgard archaea were found to lack a clear homologue  
152 of the eukaryotic Vps37. This ESCRT-I subunit is a homologue of Vps23 (reference 68 and Figure S5-  
153 8), implying that Vps37 may have arisen later in evolution in the branch leading to eukaryotes. In  
154 summary, with the notable exception of the Thorarchaeota, which seemingly lack true ubiquitin  
155 homologues (Figure 1A-C and Figure S5), most Asgard genomes have the potential to encode proteins  
156 that together resembles large parts of the conserved eukaryotic Ub-ESCRT system.

### 157 158 **Asgard archaeal ESCRT-I subcomplexes bind ubiquitin**

159  
160 In eukaryotes, a variant of the ubiquitin E2 (UEV) domain plays a key role in Ub recognition by ESCRT-  
161 I<sup>69</sup>. The UEV domain is similar in structure to the E2 region of the ubiquitin conjugating E2 enzymes, but  
162 lacks the key catalytic cysteine. We identified a number of similar proteins in Asgard archaea. The  
163 Heimdallarchaeota AB125 genome codes for four E2-like candidates: HeimAB125\_07740,  
164 HeimAB125\_09840, HeimAB125\_11700 and HeimAB125\_14070 (Figure S7A-B). Structural models of  
165 these Heimdall proteins were generated using I-TASSER<sup>70-72</sup> (Figure S7A) and structural  
166 superimposition used to confirm that, while two of the Heimdall proteins (HeimAB125\_07740 and  
167 HeimAB125\_09840) possess putative catalytic Cys residues (characteristic of *bona fide* E2 ubiquitin-  
168 conjugating proteins), two (HeimAB125\_11700 and HeimAB125\_14070) did not contain cysteine  
169 residues at the expected catalytic positions (can we HIGHLIGHT this cysteine in Figure S6? – its hard  
170 to find!), raising the possibility that these may have UEV domains and function as ubiquitin-binding  
171 proteins (Figure S7A and B). One of these UEV domain-containing proteins represents a fusion of a  
172 Vps28 domain to UEV-Vps23 (containing ESCRT-I signatures: antiparallel coiled-coil stalk region and  
173 a steadiness box). This organisation raises the possibility that this Heimdallarchaeota protein harbours  
174 both Vps23-like ubiquitin-binding activity (via the UEV-domain) and Vps28-like functions, which are  
175 central to ESCRT-II subcomplex recruitment (Figure 2A-C and Figure S7 and S8). A phylogenetic  
176 analysis was used to confirm that both Asgard and eukaryotic UEV-like proteins cluster with eukaryotic  
177 Vps23 homologues and away from *bona fide* Ubiquitin E2 enzymes – suggesting a divergence in the  
178 structure and function of UEV and E2 domains that predates the Last Asgard and Eukaryotic Common  
179 Ancestor (LAsECA) (Figure 1E). Other Asgard species, most notably Odinararchaeota archaeon LCB\_4,  
180 possess separable and distinct Vps23-like (containing the UEV domain) and Vps28 proteins, as seen in  
181 eukaryotes (Figure S8). Both these Odin proteins possess steadiness boxes, which in eukaryotes are  
182 critical for the assembly of the ESCRT-I subcomplexes<sup>9,73,74</sup>.

183  
184  
185 To test for physical interactions between these putative ESCRT-I proteins, we recombinantly expressed  
186 in *E. coli* and purified Heimdallarchaeota and Odinararchaeota ubiquitin together with their corresponding  
187 putative UEV-containing proteins and performed *in vitro* binding experiments. In the case of the  
188 Heimdallarchaeota proteins, the interaction between the purified full-length UEV-Vps23-Vps28 fusion  
189 protein and ubiquitin was analysed by chemical cross-linking followed by SDS-PAGE (Figure 2D). This  
190 revealed an increase in the apparent molecular weight of the protein upon ubiquitin binding and cross-  
191 linking (Figure 2D, top panel). In addition, we observed a ubiquitin-dependent increase in molecular  
192 weight for the isolated Heimdall UEV (Figure 2A, green), indicative of direct ubiquitin binding by this  
193 domain, rather than a different part of the full-length Vps23-Vps28 protein (Figure 2D, bottom panel). In

194 eukaryotes, binding is mediated by an Ile-residue at position 44 (I44) of Ubiquitin, which is part of a  
195 hydrophobic patch<sup>13</sup>. A model of Heimdall ubiquitin was superimposed on an available crystal structure  
196 of ubiquitin in a complex with UEV (Figure 2B-C) to identify the equivalent residues (V45 in Heimdall  
197 ubiquitin). When tested experimentally, the V45D mutation dramatically reduced the interaction between  
198 ubiquitin and the UEV domain (Figure 2D) – implying that this interaction resembles the one seen in  
199 eukaryotes.

200  
201 The same was true of the equivalent Odinararchaeotal proteins. When Odin homologues of ubiquitin,  
202 Vps23 and Vps28 were purified and mixed *in vitro*, we observed the formation of a stable complex by  
203 size-exclusion chromatography (Figure 2E); mediated by an interaction between ubiquitin and the UEV  
204 domain-containing Vps23 (Figure 2E, S9, and S10A). Furthermore, when analysed by size-exclusion  
205 chromatography, Vps23 migrated through the column faster than expected for a monomer (Figure S9).  
206 Follow up size-exclusion chromatography coupled with multi-angle light scattering (SEC-MALS)  
207 analyses (Figure S10 A-C) revealed that the Vps23 protein forms a stable dimeric assembly (60.37  
208 kDa), while the calculated mass of the Vps23-Vps28 complex was consistent with a single subunit of  
209 Vps28 associating with the Vps23 dimer (yielding a combined molecular weight of 88.27 kDa). In this,  
210 the Odinararchaeotal Vps23-Vps28 complex appears like the eukaryotic ESCRT-I subcomplex, which  
211 assembles into a heterotrimeric core ‘headpiece’ comprised of Vps23, Vps28 and Vps37<sup>74-76</sup>. As Asgard  
212 genomes encode Vps23-like proteins but lack their Vps37 homologues (Figure 1A), it is likely that the  
213 eukaryotic ESCRT-I (Fig. S8) arose from a heterotrimeric archaeal ESCRT-I subcomplex composed of  
214 a Vps23 homodimer and Vps28.

### 215 216 **Potential gene duplication and functional divergence of the eukaryotic ESCRT-II subcomplex** 217 **from putative Asgard archaeal precursors.**

218  
219 Turning to the ESCRT-II subcomplexes, our genomic analysis identified close homologues of Vps22  
220 and Vps25 in Asgard archaeal genome assemblies, but not full-length Vps36 homologues. Since  
221 eukaryotic Vps22 and Vps36 are structurally related<sup>77,78</sup>, and form a Vps22-Vps36 heterodimer, we  
222 investigated whether Asgard Vps22 homologues might homodimerize. To test this idea, we used size  
223 exclusion chromatography (Figure 3A) and SEC-MALS (Figure 3B) to show that a Heimdall-Vps22  
224 homologue (HeimAB125\_14050) migrates with a size consistent with it forming a dimer. Moreover, after  
225 chemical crosslinking to stabilize the Vps22 complex, through the addition of BS3 (a homo-bifunctional  
226 cross-linker) or EDC (hetero-bifunctional cross-linker that generates zero-length isopeptide bonds), the  
227 Vps22 protein band detected using SDS-PAGE had a molecular weight of about 50 kDa, corresponding  
228 to a dimer (Figure 3C). Finally, using chemical cross-linking coupled with mass spectrometry (XL-MS),  
229 we identified two dimerization surfaces (41-47 and 160-167 amino acid regions) in the  
230 HeimAB125\_14050 Vps22 homodimer (Figure 3D-E and Figure S11). Taken together, these data  
231 strongly suggest that Heimdallarchaeota AB125 Vps22 forms a homodimer. Thus, it appears likely that  
232 the eukaryotic Vps22-Vps36 heterodimer arose during eukaryotic evolution following a gene duplication  
233 and diversification event – just as seems to have been the case for the ESCRT-I complex. It is notable,  
234 however, that when a SEC-MALS investigation was performed with the Odinararchaeota Vps22, we did  
235 not find evidence for its homodimerization. Since the Odin protein was observed to be monomeric  
236 (Figure S10D), it is currently unclear if it adopts a homodimeric architecture in the native host conditions  
237 or might instead form a heterodimer by interacting with as-yet undiscovered proteins.

238  
239 Structural models for the Odinararchaeotal and Hemidallarchaeotal ESCRT-II subcomplex proteins using  
240 the I-TASSER<sup>70-72</sup> and tr-Rosetta<sup>79</sup> servers (Figure S12 A-B) suggested them having structural  
241 similarities with their eukaryotic counterparts, Vps22 and Vps25, based largely on the possession of  
242 shared tandem winged-helix (WH) domains<sup>77,78,80</sup>. We examined the recombinant Odinararchaeota Vps22  
243 and Vps25 by CD spectroscopy (Figure S12 C-F). This confirmed that both proteins are folded and have  
244 the predicted secondary structural elements. To further characterise Asgard ESCRT-II subunits, these  
245 proteins were submitted to crystallisation trials. In the case of Odinararchaeota Vps25, while we were  
246 unable to crystallise the full-length soluble protein, high quality crystals could be generated using an N-

247 terminally truncated version (deleting N-terminal residues 1 to 58), which were then used to determine  
248 the structure at a resolution of 1.80 Å (Supplementary Table 1 and Figure 4A-C). Inspection of this  
249 structure revealed that the Asgard Vps25 core is composed of a tandem WH domain repeat, consistent  
250 with the predicted tr-Rosetta model, and is very similar in structure to the equivalent eukaryotic protein  
251 (Figure 4C). Taken together, these findings provide further support for the idea that all the ESCRT-II  
252 subcomplex proteins in eukaryotes and Asgard archaea alike share a common molecular architecture  
253 based on a core tandem WH domain<sup>77,78</sup>. These data reinforce the concept that the ESCRT-II complex  
254 arose during archaeal and eukaryotic evolution through a series of gene duplication and specialization  
255 events<sup>81,82</sup>.

## 256 257 **Key ESCRT complex protein-protein interactions revealed by yeast-2-hybrid analyses of the** 258 **Asgard archaeal systems** 259

260 Since the ESCRT-I and ESCRT-II systems characterised above function as potential protein bridges  
261 that physically connect Ub-modified proteins with the ESCRT-III machinery, we wanted a systematic  
262 way to sensitively test for interactions within and across different subcomplexes. To do so, we carried  
263 out a comprehensive reciprocal yeast two hybrid analysis (Y2H) in budding yeast to identify pairwise  
264 protein interactions for the full set of Ub-ESCRT homologues from Thor-, Odin-, Loki- and  
265 Heimdallarchaeota (Figure 5A). As a control for this analysis, we used the same approach to  
266 systematically probe for interactions between proteins that are known to function as part of the ESCRT  
267 system in the fission yeast *Schizosaccharomyces pombe* (Figure S13 and Figure S14). Importantly, in  
268 these control experiments we were able to identify many of the expected interactions between  
269 components of the Ub-ESCRT system in fission yeast. This included the previously reported interactions  
270 within the respective ESCRT complexes; ESCRT-I (Sst6-Vps28), ESCRT-II (Vps22-Vps25, Vps36-  
271 Vps25), ESCRT-III (Vps20-Vps32, Vps24-Did4), as well as published interactions that bridge the  
272 eukaryotic ESCRT-I and -II subcomplexes (Vps28-Vps36) and those that connect ESCRT-II and -III  
273 (Vps20-Vps25, Vps20-Vps22) (Figure S13A).

274  
275 We then applied Y2H analyses to systematically search for protein-protein interactions between  
276 ESCRT-related components encoded by Asgard archaeal genomes (Figure 5A). As expected, these  
277 assays revealed interactions between ESCRT-III components and the Vps4 ATPase. In line with the  
278 biochemical data presented above, these Y2H analyses also identified interactions between ubiquitin  
279 and UEV domain-containing proteins in Heimdallarchaeota, Odinararchaeota and Lokiarchaeota (Figure  
280 5A and S14). Furthermore, the UEV domain-containing Vps23 homologues from Odinararchaeota and  
281 Heimdallarchaeota displayed interactions with Vps28, as expected if they formed an ESCRT-I  
282 subcomplex, whereas the Heimdallarchaeota utilise the single Vps23-Vps28 fusion protein homologue  
283 discussed above. The Y2H assays also detected the interaction between ubiquitin and this Heimdall  
284 ESCRT-I fusion (Figure 5A and Figure S13B). Interestingly, this analysis also suggested an alternative  
285 pattern of protein interactions for the corresponding ESCRT-I proteins from Loki and Thor. In these two  
286 cases, the freestanding steadiness box protein, equivalent to the alpha-helical hairpin ‘headpiece’<sup>73,74,83</sup>  
287 coded within the same genomic neighbourhood as the rest of the Loki ESCRT machinery (Figure 1C),  
288 may come into play by interacting with Vps28 – mirroring the role of its eukaryotic counterpart in  
289 mediating interactions between Vps23, Vps28 and Vps37.

290  
291 The Y2H analyses also identified multiple interactions between the Lokiarchaeota and  
292 Heimdallarchaeota ESCRT-I (Vps28 and/or Vps23) and ESCRT-II (Vps22) complexes. In addition, the  
293 Y2H experiments indicate that the ESCRT-II component Vps22 from Heimdall, Loki and Thor can  
294 interact with themselves, in agreement with the biochemical assays shown above. Finally, we identified  
295 numerous interactions linking the Asgard ESCRT-II and -III (Vps25-ESCRT-IIIB), Vps4-ESCRT-III and  
296 between the ESCRT-III homologues (-IIIA and -IIIB) (Figure 5A and Figure S14), and suggests the  
297 possibility of additional interactions between ESCRT-I and II subcomplexes with ESCRT-III proteins that  
298 bypass Vps25 in Loki and Thor archaeota. We note that although we were unable to detect many such  
299 interactions between the Odinararchaeotal proteins using the Y2H approach, since Odin is a thermophile,

300 it seems likely that the temperature used for these experiments (25°C) may have influenced our ability  
301 to identify interactions between proteins that are optimised to fold and work at much higher physiological  
302 temperatures<sup>58</sup>.

303

## 304 **DISCUSSION:**

305

306 Here we provide experimental and computational support for the idea that many Asgard archaea  
307 possess a streamlined version of the Ub-ESCRT system present in eukaryotes (Figure 5B). It is clear  
308 from our analyses, however, that the precise composition differs between species and across phyla.  
309 This is especially the case for ESCRT-I subunit architecture. However, except for Thorarchaeota (in  
310 which ubiquitin encoding genes are yet to be identified), we found ubiquitin-binding UEV-domain  
311 containing proteins coded by the genomes analysed. While these domains were often harboured within  
312 proteins homologous to Vps23, which include a C-terminal alpha-helical headpiece region involved in  
313 ESCRT-I complex assembly, in other systems this alpha-helical 'steadiness box' domain was encoded  
314 by a freestanding protein. Alternative ESCRT-I domain arrangements were also observed, such as the  
315 UEV-Vps23-Vps28 fusion found in Heimdallarchaeota (Figure S8). Taken together, the clear synteny  
316 between genes of ubiquitylation apparatus and the ESCRT machinery in the Loki-, Hel-, Odin-, and  
317 Heimdallarchaeotal genomes, and the experimentally verified Y2H interactions between ubiquitin and  
318 UEVs in all the Asgard investigated, support a model in which ubiquitylated substrates recruit the  
319 ESCRT-I in Asgard archaea.

320

321 In line with this, we were able to demonstrate direct binding between ubiquitin and UEV-containing  
322 proteins that was dependent on a conserved hydrophobic patch in ubiquitin. Although Asgard archaea  
323 appear to lack homologues of the eukaryotic ESCRT-I subunit Vps37 (which assembles into a trimer  
324 with Vps23 and Vps28), it is notable that Vps23 and Vps28 from Odinararchaeota assemble into a similar  
325 trimer that contains two copies of Vps23. It is therefore possible that all three proteins of the eukaryotic  
326 ESCRT-I complex evolved from a common ancestor containing an alpha-helical hairpin region, with  
327 Vps37 having arisen as a eukaryotic innovation<sup>73</sup>.

328

329 Similarly, the eukaryotic ESCRT-II subcomplex forms a 'Y-shaped' hetero-tetrameric structure  
330 consisting of a Vps22/Vps36 stalk which binds two Vps25 subunits<sup>77,78</sup>. Although Vps22 and Vps25  
331 coding genes were readily identifiable in the Asgard genomes as reported previously, we were unable  
332 to identify Vps36 homologues. However, our biochemical and Y2H interrogation suggest that Vps22  
333 from several Asgard phyla likely forms homodimers. In the corresponding eukaryotic complex, all three  
334 of these ESCRT-II proteins (Vps22, Vps36 and Vps25) contain an evolutionarily conserved globular  
335 core consisting of tandem winged helix (WH) domains<sup>77,78,80</sup>. The same appears true for the Asgard  
336 ESCRT-II machinery, based upon modelling of Vps22 and Vps25 proteins from Odinararchaeota, and the  
337 crystallographic Odinararchaeotal Vps25 structure. This suggests that all ESCRT-II proteins were initially  
338 derived from a single WH-domain protein progenitor, with Vps36 emerging during eukaryogenesis.

339

340 Do ESCRT-I, -II, and -III contribute to a single pathway? The colocalization and synteny analyses strongly  
341 suggest this possibility. The colocalization of ESCRT-III with Vps25 indicates that these proteins function in  
342 a related biochemical process. Y2H experiments revealed consistent interactions between Vps25 and  
343 ESCRT-IIIB. Furthermore, this analysis provided support for there being an interaction between ESCRT-  
344 I and ESCRT-II. We also found an interaction between the Lokiarchaeota steadiness box protein and  
345 Vps22, supporting the existence of physical interactions between the ESCRT-I and ESCRT-II  
346 subcomplexes. These Y2H data and the corresponding gene cluster analysis point to ESCRT -I, -II, and  
347 -III functioning in concert in Asgard archaea – although confirmation of this will require a future cell  
348 biological and/or biochemical analyses. While it is not yet clear how the Ub-ESCRT system evolved, we  
349 note that while ESCRT-III type proteins can be traced back to the last universal common ancestor  
350 (LUCA)<sup>63</sup>, the Vps4 and ESCRT-III pair can only be found in archaea, whereas Ub, ESCRT-I and  
351 ESCRT-II components are only found together in Asgard (with the exception of Thorarchaeota, which  
352 seemingly lack true ubiquitin homologues). This suggests a plausible pathway for the stepwise evolution

353 of the eukaryotic ubiquitin-directed ESCRT-dependent membrane trafficking system as, from its simple  
354 beginnings in an archaeal progenitor, the machinery grew in complexity through successive rounds of  
355 domain concatenation, gene duplication and divergence (Figure 5B).

356

## 357 **MATERIALS AND METHODS**

358

### 359 **Genomic survey of protein homologues**

360 All genomes from organisms classified as Asgard archaea were downloaded from NCBI on December  
361 5<sup>th</sup>, 2020. These genomes were taxonomically reclassified through a phylogenetic analysis based on a  
362 set of 15 ribosomal proteins encoded in co-locating genes<sup>84</sup>. To ensure annotation homogeneity, protein  
363 sequences were predicted de novo using Prodigal v2.6.3<sup>85</sup>, and ribosomal protein genes were detected  
364 using psiblast<sup>86</sup> using predetermined orthologous sequences<sup>58</sup>, aligned with Mafft-linsi v7.450<sup>87</sup> and  
365 processed with trimAl v1.4.rev22<sup>88</sup> to remove sites with over 50% gaps. All genomes containing at least  
366 5 of these proteins were concatenated and used to reconstruct a tree with IQ-Tree v2.0-rc1<sup>89</sup> the  
367 LG+C60+R4+F model, using 1000 pseudoreplicates for ultrafast bootstrap<sup>90</sup> and SH-approximate  
368 likelihood ratio tests (Figure S1).

369

370 These reclassified genomes were then annotated using interproscan v5.48-83.0<sup>91</sup>. A set of interpro  
371 domains were used as diagnostic for the inference of Vps23/37 (IPR017916), Vps28 (IPR007143,  
372 IPR037206), Vps23/37/28 (IPR037202), Vps22/36 (IPR016689, IPR040608, IPR021648), Vps25  
373 (IPR008570, IPR014041), ESCRT-III (IPR005024), Vps4 (IPR007330, IPR031255, IPR015415),  
374 ubiquitin (IPR029071, IPR000626), ubiquitin-activating enzyme E1 (IPR000594), ubiquitin-conjugating  
375 enzyme E2 (IPR000608, IPR006575, IPR016135), ubiquitin-ligase enzyme E3 (IPR018611), and  
376 deubiquitinating enzyme (IPR000555) genes.

377

378 Co-location of these genes was investigated through custom perl scripts and visualised using R (R Core  
379 Team 2018, R: A language and environment for statistical computing. R Foundation for Statistical  
380 Computing, Vienna, Austria. <https://www.R-project.org/>) and the packages ggplot2<sup>92</sup>, cowplot  
381 (<https://CRAN.R-project.org/package=cowplot>), and genoPlotR<sup>93</sup>.

382

### 383 **Generation of model structures using I-TASSER server**

384 The model structures used in this study were generated as described below:

385 (1) The model structure of Heimdall E2-like proteins for Figure S7A were generated using I-TASSER<sup>70-</sup>  
386 <sup>72</sup> (<https://zhanglab.ccmb.med.umich.edu/I-TASSER/>). No template structure was selected for this  
387 modelling. The amino acid sequence used for structural modelling is as follows; HeimAB125\_07740  
388 (27th-135th amino acid residues); (ii) HeimAB125\_09840 (1st-107th amino acid residues); (iii)  
389 HeimAB125\_14070 (51st-108th amino acid residues); (iv) HeimAB125\_11700 (25th-122nd amino acid  
390 residues). The amino acid residues for the structural modelling were selected based on InterPro  
391 annotation of "UBIQUITIN\_CONJUGAT\_2". It is important to note that the c score of HeimAB125\_14070  
392 truncation was NaN, due to lower reliability of the model structure.

393 (2) The model structure of Heimdall UEV domain in HeimAB125\_14070 (1st-130th amino acid residues)  
394 in complex with ubiquitin (used in Figure 3B and S7B) was generated using I-TASSER with crystal  
395 structure of yeast UEV in complex with ubiquitin (PDB: 1UZXA).

396 (3) The model structure of Heimdall UEV domain in HeimAB125\_14070 (1st-130th amino acid residues)  
397 for Figure S7A was generated by using I-TASSER with crystal structure of UEV (PDB: 1KPQ).

398 (4) The model structure of Heimdall ubiquitin (HeimAB125\_14240) and Heimdall Vps22  
399 (HeimAB125\_14050) were generated by I-TASSER without assigning template structures.

400 In most of the cases, I-TASSER provided several models. We always used the model which showed  
401 the highest c scores. The score, templates and amino acid region were listed in Table S1.

402

### 403 **Asgard proteins used in this study**

404 The Heimdall-, Loki-, Odin-, and Thorarchaeota amino acid sequences were obtained from Uniprot  
405 (<https://www.uniprot.org/>) and the Uniprot Entry ID are listed in Table S2. The corresponding genes



406 were synthesized for the expression in *E. coli* and yeast. The Odinarchaeota\_LCB4 ORFs (accession  
407 codes provided in Supplementary Table 2) were PCR amplified from MDA amplified environmental DNA  
408 isolated from the Lower Culex Basin Yellowstone National Park, USA as described<sup>94</sup> and cloned into  
409 either pET28a (Vps23 and Vps28) or pET30 (Vps22 and Vps25) (Novagen), respectively. Amplified  
410 genes were cloned into the plasmids using the restriction sites placing the ORFs in frame with the  
411 plasmid-encoded hexa-histidine tags.

412

### 413 **Plasmids used in this study**

414 The Asgard genes obtained by gene synthesis were cloned into yeast two-hybrid (Y2H) vectors and *E.*  
415 *coli* expression vector. The plasmids for Y2H are listed in Table S3. The *E. coli* expression plasmids are  
416 listed Table S6.

417

### 418 **Systematic, Reciprocal Yeast Two-Hybrid assays**

419 Y2H assays were performed using the set of genes listed in Table S3. The plasmids used in this study  
420 are listed in Table S3. Indicated genes of interest were cloned both in “bait-ProteinA” and “prey-ProteinB”  
421 vectors or vice versa, which have DNA binding protein LexA and/or activation domain of Gal4p were  
422 cloned into pMM5 and pMM6 plasmids respectively<sup>95,96</sup>. Plasmids carrying these constructs were  
423 transformed into the yeast strains SGY37 (MATa) and YPH500 (MAT $\alpha$ ). Transformants with plasmids  
424 plexADBBD (pMM5) and pGal4AD (pMM6) were selected on plates lacking Histidine or Leucine,  
425 respectively. After mating, the two strains carrying the desired plasmids were grown on YPD plates for  
426 2 days at 30°C and replica plated on selection plates (without Histidine and Leucine) for 2 days at 30°C  
427 before the overlay. The interaction between the protein products fused to the DNA binding and activation  
428 domains were analyzed by the activity of  $\beta$ -galactosidase by the cleavage of X-Gal (BIO-37035, Bioline,  
429 UK). For detecting the  $\beta$ -galactosidase activity overlaying of low melting agarose with X-Gal (over lay  
430 mix was prepared freshly), overlay solution was added slowly on to the plates. Interaction of LexA-  
431 Protein-A with Gal4-Protein-B resulted in the activation of expression of the lacZ gene coding for  $\beta$ -  
432 galactosidase, converting X-Gal to produce blue colour. Plates were monitored every 30 minutes to see  
433 the appearance of blue colour. Plates were scanned after 16hr of incubation with the X-Gal overlay  
434 mixture.

435

### 436 **Phylogenetic reconstruction**

437 [A] UEV and E2

438 Amino acid sequences of UEV domain-containing proteins, TSG101/Vps23 and UBC domain-containing  
439 proteins in *H. sapiens*, *S. cerevisiae*, *D. discoideum*, *E. histolytica*, *A. thaliana*, *C. marolaie*, *T. brucei*, *T.*  
440 *pseudonana* and *T. parva* were obtained from Uniprot. Asgard E2L proteins from Odinararchaeota (strain  
441 LCB\_4), Heimdallarchaeota (strains AB125, LC2 and LC3), and Lokiarchaeota (strains GC14\_75 and  
442 CR\_4) were also obtained from Uniprot. These sequences were aligned with Mafft-linsi v7.450, and the  
443 resulting multiple-sequence alignment was used as query for a Psiblast (v2.10.0+) against all Asgard  
444 archaeal genomes (see Genome survey of protein homologs). All hits with e-values lower than 1e-5  
445 were used together with query sequences and aligned using Mafft-linsi. The resulting alignment was  
446 trimmed using trimAl v1.4.rev22, and sequences containing over 60% gaps in the trimmed alignment  
447 were removed. The obtained alignment was used for a phylogenetic reconstruction with IQ-Tree 2.0-  
448 rc2<sup>89</sup>, under the model Q.pfam+C20+G4+F, chosen by ModelFinder<sup>97</sup> between combinations of  
449 empirical matrices (LG, WAG, JTT, and Q.pfam) with mixture models (C20, C40, and C60) and various  
450 rate heterogeneity (none, G4 and R4) and frequency (none, and F) and using 1000 ultrafast bootstrap  
451 pseudoreplicates. The resulting phylogeny was used as guide to reconstruct another tree under the  
452 PMSF approximation of the chosen model and using 100 non-parametric bootstrap pseudoreplicates.  
453 The resulting bootstrap trees were used both using the standard Felsenstein Bootstrap Proportion and  
454 the more recent Transfer Bootstrap Expectation<sup>98</sup> interpretations.

455

456 [B] Vps22 and Vps36

457 Eukaryotic Vps22, Vps36 and Vps25 and Asgard Vps22/36 and Vps25 homologs sequences were  
458 downloaded from NCBI (Supplementary Data X). These 187 sequences were aligned using Mafft-linsi

459 v7.450 and trimmed with trimAl with the parameter “-gappypout”. A maximum-likelihood tree was then  
460 reconstructed using IQ-Tree v2.0-rc1 under the model LG+C60+R4+F, using 1000 ultrafast bootstrap  
461 and SH-approximate likelihood ratio test pseudoreplicates. In parallel, potential outgroup sequences  
462 (eukaryotic Rpc35/Rpc6, Asgard archaeal UFM1 and bacterial ScpB; Supplementary Data X) were  
463 downloaded and added to the previous sequences. Three additional Asgard archaeal sequences were  
464 found to contain potential plekstrin domains and were used as query for a Blast-p search against the  
465 Asgard proteomes to recruit homologs identified as hits with e-values lower than 1e-10. The resulting  
466 set of 314 sequences was then aligned with Mafft-linsi v7.450 and trimmed with trimAl to remove all  
467 sites with over 90% gaps. The resulting trimmed alignment was used to reconstruct a maximum-  
468 likelihood tree using IQ-Tree v2.0-rc2 under the PMSF approximation<sup>99</sup> of the LG+C60+R4+F model  
469 using 100 non-parametric bootstrap pseudoreplicates. The resulting bootstrap trees were used both  
470 using the standard Felsenstein Bootstrap Proportion and the more recent Transfer Bootstrap  
471 Expectation interpretations. To ensure we did not miss possible homologs of ESCRT-II sequences  
472 outside of Asgards, we used the previous set of 187 Vps22/Vps36/Vps25 sequences as query for a  
473 psiblast search against the NR database (1 iteration, e-value threshold of 1e-10), and parsed the  
474 resulting 4745 hits to remove proteins originating from Asgard archaeal or eukaryotic genomes. After  
475 parsing, only 9 sequences remained, belonging to various putative archaea and bacteria. A Blast-p  
476 search of these sequences against NR confirmed that their best hits were Asgard archaea or eukaryotic  
477 sequences. We added these sequences to the previous 227 Vps22/Vps36/Vps25/Outgroup sequences,  
478 aligned them with Mafft-linsi v7.450 and trimmed with trimAl to remove sites with over 50% gaps. We  
479 used this alignment to reconstruct a tree with IQ-Tree under the LG+C20+G4+F model, using 1000  
480 ultrafast bootstrap and SH-approximate likelihood ratio test pseudoreplicates. The resulting tree  
481 confirmed that these 9 homologs were well embedded in the clades of Asgard archaeal or eukaryotic  
482 Vps22, thus likely representing Asgard archaeal or eukaryotic Vps22 sequences that have been  
483 misclassified in public databases.

484  
485

#### 486 **bdSUMO tag vector and bdSUMO protease used in this study**

487 The vector carrying a 6-His residues (His-tag) followed by SUMO protein from *Brachypodium distachyon*  
488 were generated as described before<sup>100,101</sup> with slight modification. The gene of *B. distachyon* SUMO  
489 protein (bdSUMO) was synthesized (IDT gBlock) and cloned into pET28a in frame with sequence  
490 encoding the N-terminal His-tag. The codon of the bdSUMO was optimized for the expression in *E. coli*  
491 K12 strain. The resulting vector, pSUMO was used to clone Heimdall ESCRT genes for their expression  
492 in *E. coli* BL21(DE3). To express and purify SUMO protease in *B. distachyo*, we synthesized genes of  
493 *B. distachyo* SENP1 whose codone were optimized for expression in *E. coli* (IDT gBlock). The gene  
494 fragment was cloned into pET28a vector in-frame with N-terminal His-tag. The protein, His-bdSENP1  
495 was expressed in BL21(DE3) and purified and used for SUMO-TAG cleavage.

496

#### 497 **Buffers used for protein purification**

498 The composition of ESCRT lysis buffer was as follows: 50 mM Tris-HCl (pH 7.5), 2.5 mM MgCl<sub>2</sub>, 150  
499 mM NaCl, 2 mM DTT, 2 mM ATP, and 15 mM Imidazole. The composition of ESCRT buffer was as  
500 follows: 50 mM Tris-HCl (pH 7.5), 2.5 mM MgCl<sub>2</sub> and 150 mM NaCl. The composition of XL buffer is as  
501 follows; 20 mM HEPES-NaOH (pH 7.5), 150 mM NaCl.

502

#### 503 **Protein purification**

504

##### 505 (A) Heimdall proteins

506

##### 507 Purification of untagged proteins

508 The proteins were expressed as N-terminal His-SUMO fusions (His-SUMO) from a pSUMO vector. After  
509 the affinity purification using His-Nickel interaction, the His-SUMO was cleaved by His-bdSENP1 and  
510 both the N-terminal His-SUMO tag and His-bdSENP1 were absorbed on a Ni-NTA column. The  
511 untagged recombinant protein was further purified by size-exclusion chromatography (SEC).

512  
513  
514  
515  
516  
517  
518  
519  
520  
521  
522  
523  
524  
525  
526  
527  
528  
529  
530  
531  
532  
533  
534  
535  
536  
537  
538  
539  
540  
541  
542  
543  
544  
545  
546  
547  
548  
549  
550  
551  
552  
553  
554  
555  
556  
557  
558  
559  
560  
561  
562  
563  
564

## Purification of ESCRT proteins

### [a] Heimdall Vps22 and Full-length or UEV-domain of Heimdall UEV-Vps28 (HeimAB125\_14070)

The *E. coli* cells expressing these fusion proteins were lysed using a pressure homogenizer (Stanstead #FPG12800, the 20-30 psi for several times precooled at 5°C) instead of sonicator. Elution after the SEC was concentrated followed by high-speed centrifugation at 4°C (21000xg, 15 min) to get rid of aggregation. The samples were snap-frozen and stored at -80°C.

### [b] Ubiquitin with N-terminal His tag

Cells were re-suspended in lysis buffer containing 2x concentration of PIC (Roche complete, EDTA-free #05056489001) and 2 mM PMSF. Cells were lysed using a pressure homogenizer (Stanstead #FPG12800, the 20-30 psi for several times) precooled to 5°C. After cell lysis, the total volume of the sample was ~50 mL. The insoluble fraction was removed by high-speed centrifugation at 4°C (25658 x g for 1 hour, Thermo Fisher SCIENTIFIC #A23-6 x 100 rotor). The supernatant was incubated with 2 ml Ni-NTA resin (Thermo SCIENTIFIC #88222) for 1 hour at 4°C. The resin was washed with 200 mL ice-cold lysis buffer, followed by 150 ml ESCRT-buffer. The bound protein was eluted with ESCRT-buffer containing 300 mM imidazole. Elution fractions were combined and concentrated to a volume of 500 µl. The sample was spun at 21000 x g for 15 min at 4°C and the supernatant was applied to 16/60 sephacryl S-100 HR column equilibrated with ESCRT-buffer. The eluate was concentrated and spun at 4°C (21000xg, 15 min) to get rid of aggregates. The samples were snap-frozen and stored at -80°C.

## (B) Odinarchaeal proteins

Thermophilic *Odinarchaeota* proteins were expressed in Rosetta (DE3) pLysS *Escherichia coli* cells (Novagen). Cultures were grown at 37°C to an OD<sub>600</sub> of 0.3 then cooled to 25°C and further grown to an OD<sub>600</sub> of 0.6 and induced overnight with 0.33 mM IPTG. Cells expressing the recombinant *Odinarchaeota* proteins were harvested by centrifugation, resuspended in 20 mM Tris-HCl (pH 8.0), 300 mM NaCl, 5% glycerol, 0.05% β-mercaptoethanol. 1X EDTA-free protease inhibitors (Complete cocktail, Roche) were added and cells were lysed by sonication and heat clarified at 60°C for 20 min before centrifugation at (14,000 r.p.m. for 10 min) to remove insoluble material. Supernatants were filtered and then purified by IMAC by gravity flow to a column of Ni-NTA agarose (Qiagen). The columns were washed with resuspension buffer and then resuspension buffer plus 15 mM imidazole. Proteins were then eluted in resuspension buffer plus 500 mM imidazole. Fractions containing the purified proteins were pooled and concentrated before running a size-exclusion chromatography (SEC) step over a Superdex 200 16/600 column (GE Healthcare), in 20 mM Tris-HCl pH 8, 300 mM NaCl, 5% glycerol, 0.5 mM dithiothreitol. N-terminal His-tags were then removed from the *Odinarchaeota* Vps23(TSG101) and Vps28 proteins by thrombin cleavage and further purification by SEC. Fractions containing the purified proteins were pooled, concentrated, aliquoted and flash frozen in liquid N<sub>2</sub>. Protein concentrations were quantified by UV spectrophotometry.

## Analyticals Size Exclusion Chromatography

Heimdallarchaeota Vps22 (27.9 kDa) was subjected to analytical SEC using a Superdex 200 16/600 size exclusion column (GE Healthcare). The sample was loaded onto the column in a buffer comprised of 20 mM Tris-HCl pH 8.0, 200 mM NaCl and 5% (v/v) glycerol at a flow rate of 0.5 mL/min. The calibration curve was established under the same conditions using the following standard proteins (Sigma MWGF1000): carbonic anhydrase (CAN; 29 kDa), bovine serum albumin (BSA; 66 kDa), alcohol dehydrogenase (ADH; 150 kDa), beta-amylase (BAM; 200 kDa), apoferritin (AFE; 443 kDa) and thyroglobulin (TGL; 669 kDa).

Physical interaction between the *Odinarchaeota* ESCRT-I complex proteins (Vps23, Vps28 and ubiquitin) was examined by size-exclusion chromatography using an analytical Superdex S200 HR 10/300 column (GE Healthcare). Prior to the gel filtration analyses, ESCRT-I complexes were formed at 60°C by mixing 250 µg of each protein in a final volume of 500 µl gel filtration buffer (20 mM Tris [pH

565 8.0], 150 mM NaCl, 5% glycerol, 1 mM DTT). The complexes were subsequently spun at 16,000 *g* in a  
566 benchtop centrifuge for 5 min to remove any precipitated material, before loading onto the size exclusion  
567 chromatography column. 0.5 ml fractions were collected and resolved by SDS-PAGE, on 15%  
568 polyacrylamide gels. The proteins were then visualized with Coomassie stain.

569

### 570 **Size exclusion chromatography–multi-angle laser light scattering (SEC-MALS)**

571 The molecular mass and oligomeric state of Heimdall Vps22 was determined in solution using SEC-  
572 MALS. Data were obtained with a Wyatt HeleosII18 angle light scattering machine connected to a Wyatt  
573 Optilab rEX online refractive index detector (Wyatt Technology). Samples were purified using a  
574 Superdex 200 increase 10/300 analytical gel filtration column (Cytiva) coupled to an Agilent 1200 series  
575 LC system at 0.5 ml/min in 20 mM Tris-HCl pH 8.0, 200 mM NaCl buffer before detecting the light  
576 scattering and refractive index in a standard SEC-MALS format. Protein concentration was obtained  
577 from the excess differential refractive index of 0.185  $\Delta$ RI for 1 g/ml or using the sequence UV extinction  
578 coefficient of 0.964 at 280 nm for 1 mg/ml calculated by ProtParam. The determined protein  
579 concentration and scattering intensities were used to estimate the molecular mass from the intercept of  
580 a Debye plot using Zimm's model and the Wyatt ASTRA software. The experimental configuration was  
581 checked with a BSA standard, run in the same buffer and using the same sample injection volume of  
582 100  $\mu$ L. The BSA monomer peak was utilised to examine the mass determination and to inspect the  
583 inter-detector delay volumes and band broadening parameters that were used during analysis in Wyatt's  
584 ASTRA software. The SEC chromatogram, showing RI as concentration signal, is shown in Figure 3B  
585 as blue and red lines for loaded sample concentration of 2 and 0.5 mg/ml, respectively. The mass  
586 evaluated averaged over the central 75% of peak area is 54.4 and 54.2 kDa for the two loadings  
587 indicating stable formation of dimer at SEC concentrations. The mass evaluated using UV as  
588 concentration source was 55.7 kDa for the 2 mg/ml sample. The *Odinarchaeota* samples were analysed  
589 by SEC-MALS (100  $\mu$ l protein complex at 2 mg/ml) were passed over a Superdex 200 10/300 Increase  
590 GL column (GE Healthcare), in 20 mM Tris (pH 8.0), 300 mM NaCl. The column output was fed into a  
591 miniDAWN TREOS MALS detector system with a 60mW laser source at 664 nm, and three fixed angle  
592 detectors at 49, 90, and 131 degrees (Wyatt Technology), followed by a Shimadzu RID-20A Refractive  
593 Index Detector at 30.5°C.

594

### 595 **Circular Dichroism (CD)**

596 Proteins were buffer exchanged into freshly prepared buffer (10 mM potassium phosphate, 50 mM  
597 sodium sulphate, pH 7.2) using PD-10 desalting prepacked columns (Sephadex G-25M, GE Healthcare)  
598 following manufactures instructions.

599 From the protein samples (5  $\mu$ M) CD spectra (in triplicate) were acquired using a Chirascan  
600 Plus Benchtop CD spectrophotometer over 180-260 nm with a bandwidth of 2 nm and a pathlength of  
601 0.2 mm. The mean buffer subtracted CD spectra (measured ellipticity: mdeg) were  
602 interpolated between 190-250 nm using Origin Pro 2018b and fitted to the BeStSel algorithm to  
603 determine the secondary structural elements<sup>102</sup>. Structural models for each ESCRT protein were  
604 generated using I-TASSER<sup>70-72</sup> (or for full-length Vps25, trRosetta<sup>79</sup>) after which the STRIDE web  
605 server<sup>103</sup> was used to estimate secondary structure elements for comparison with the CD derived  
606 estimations.

607

### 608 **$\Delta$ N\_Vps25 Crystallisation conditions**

609 An N-terminally truncated Vps25 expression construct (removing the first 58 amino acids) was  
610 generated using the primers and Od $\Delta$ N\_ESCIIIV25forXhoI and OdESCIIIV25revXhoI as described in  
611 Supplementary Table 2. The protein was purified as described above, except 5.25 mM TCEP was used  
612 as the reducing agent in the final size exclusion chromatography step.

613  $\Delta$ N\_Vps25 crystals were grown by sitting-drop vapour diffusion using our in-house high-throughput  
614 crystallisation platform<sup>104</sup>. Vps25 was used at a concentration of 21.4 mg/ml and the best crystals were  
615 obtained in the condition E12 of the Morpheus screen<sup>105</sup>: [120 mM ethylene glycols, 100 mM buffer 3  
616 (26.7 ml 1 M bicine plus 23.3 ml 1 M Trizma base), 12.5 % (w/v) PEG 3350, 12.5 % (w/v), 12.5 % (w/v)

617 PEG 1K, 12.5 % (w/v) MPD], pH 8.5 at 20°C with a protein : reservoir ratio of 1:4 and a total volume of  
618 0.4 µl. The condition was already cryo-protected. Crystals were harvested by flash cooling in liquid  
619 nitrogen.

620

### 621 **X-ray diffraction data collection**

622 Native diffraction data were collected at Diamond Light Source (Harwell, UK) at beamline I03. Data  
623 were collected over 360° with 0.1° oscillation (Supplemental Table 1), integrated with DIALS  
624 (<https://doi.org/10.1107/S2059798317017235>) and scaled/merged with Aimless  
625 (<https://www.ncbi.nlm.nih.gov/pmc/articles/PMC3689523/>) from the CCP4 suite<sup>106</sup>. The crystals belong  
626 to the space group P2<sub>1</sub>2<sub>1</sub>2, with unit cell dimensions of a = 101.23 Å, b = 31.5 Å, c = 59.5 Å and one  
627 molecule per asymmetric unit. The crystals diffracted up to 1.8 Å. BALBES was used to determine  
628 initial phases by Molecular Replacement against the entire PDB<sup>107</sup>. Manual building was done in  
629 COOT<sup>108</sup> and refinement with REFMAC5. MOLPROBITY was used for model validation<sup>109</sup>. Statistics  
630 are listed in Table 1. The coordinates and structure factors of the *Odinarchaeota* Vps25ΔN crystal  
631 structure were deposited in the Protein Data Bank under accession code 7PB9.

632

633

### 634 **Chemical cross-linking of proteins**

#### 635 [A] Vps22 dimer

636 Vps22 was diluted to 15 µM after the buffer exchange to XL-buffer and incubated with 16 mM EDC  
637 (Thermo Scientific, #22980) and 16 mM Sulfo-NHS (Thermo Fisher Scientific, #A39269) or 2 mM BS3  
638 [bis(sulfosuccinimidyl)suberate, Creativemolecules, #001SS] on ice for 1 or 2 hours, respectively. 55.6  
639 mM Tris-HCl (pH 6.8) was added into the mixture to quench the cross-linking reaction. The sample was  
640 incubated on ice for 10 min to quench the cross-linking reactions. The samples were loaded in SDS-  
641 PAGE gels to separate individual or cross-linked proteins.

#### 642 [B] Ubiquitin and UEV

643 The full length (0.4 µM) or 1:130 amino acid residues containing UEV domain (5 µM) of Heimdall\_14070  
644 were incubated with 0, 1, 2, 4, 8, 16 and 24 µM Heimdall\_14240 (wild-type or I45V) and 5 mM BS3  
645 (Creativemolecules, #001SS) on ice for 2 hours. The cross-linking reaction was quenched by addition  
646 of 50 mM Tris-HCl (pH 6.8). The samples were loaded in SDS-PAGE gels to separate individual or  
647 cross-linked proteins. 50 mM Ammonium Bicarbonate (#A6141, Sigma) was used to dilute the sample  
648 using equal volume and reduced/alkylated using 10mM Tris-[(2-carboxyethyl) phosphine hydrochloride  
649 (TCEP) (#148415000, ACROS Organics)/40 mM 2-chromoacetamide (CAA) (#C4706-2G, Sigma) for 5  
650 minutes at 70°C. The samples were digested overnight at 37°C with 1 µg trypsin (sequencing grade;  
651 #V5111, Promega) per 100 µg of protein.

652

### 653 **Chemical cross-linking coupled with mass spectrometric analysis**

654 LC-MS was performed using Ultimate® 3000 HPLC series for peptide concentration and separation.  
655 Nano Series™ Standards Columns were then utilised to separate the samples. A linear gradient from  
656 4% to 25% solvent B (0.1% formic acid in acetonitrile) was applied over 30 min, followed by 25% to 90%  
657 solvent B for 20 min. Peptides were eluted using at a rate of 250 nL min<sup>-1</sup> using a Triversa Nanomate  
658 nano spray into the Orbitrap Fusion mass spectrometer (ThermoScientific). Mass scan range of 375-  
659 1500 were used for the peptide precursors at 120 K resolution, with automatic gain control of 4x10<sup>5</sup>.  
660 Precursor ions range of 2-7 were isolated and fragmented using Higher-energy Collisional Dissociation  
661 (HCD) fragmentation using the Orbitrap detector at a resolution of 30 K. MS/MS fragmentation was  
662 performed using a collision energy of 33%, with a maximum injection time of 200 ms and automatic gain  
663 control of 1x10<sup>4</sup>. Dynamic exclusion duration of 45 s with 5 ppm tolerance was used for the selected  
664 precursor and its isotopes. The instrument was run with a cycle time of 2 s. 20 µl of the samples were  
665 injected into the nano LC-ESI-MS/MS using an Ultimate 3000/Orbitrap Fusion (Thermo Scientific) using  
666 a 60-minute LC separation over a 50 cm column. The ProteoWizard MSConvert toolkit<sup>42</sup> was used to  
667 convert the raw data files into .mgf format. Scaffold Proteome Software was used for sequence  
668 visualization and coverage. Cross-linked peptides were analysed using the Stavrox software<sup>110</sup>, using  
669 the in-built parameters for either BS3 or EDC. Precursor and fragment ion tolerance were set to 10 ppm.

670 The spectra were manually inspected, and continuous fragment ions were expected to be seen for both  
671 peptides. Cross-linked peptides were identified in two replicate datasets. Detected peptides were listed  
672 in Table S4.

673

## 674 **ACKNOWLEDGEMENTS**

675

676 We thank Dr. Masayuki Onishi (Duke University) for critical reading and constructive comments on a  
677 early version of the manuscript. Computational analysis was facilitated by resources provided by the  
678 Swedish National Infrastructure for Computing (SNIC) at the Uppsala Multidisciplinary Center for  
679 Advanced Computational Science (UPPMAX), partially funded by the Swedish Research Council  
680 through grant agreement no. 2018-05973. We thank the Warwick Proteomics RTP for mass  
681 spectrometry. MKB was supported by the Wellcome Trust (WT101885MA) and the European Research  
682 Council (ERC-2014-ADG No. 671083). Work by the NR laboratory was supported by start-up funds from  
683 the Division of Biomedical and Life Sciences (BLS, Lancaster University) and a Leverhulme Research  
684 Project Grant (RPG-2019-297). NR would like to thank Johanna Syrjanen for performing trial  
685 expressions of the Odinarchaeota ESCRT proteins, and Joseph Maman for helpful discussion regarding  
686 the SEC-MALS. NR, WX and AP would like to thank Charley Lai and Siu-Kei Yau for assistance with  
687 initial Odinarchaeota ESCRT protein purifications. DPS and BB would like to thank Chris Johnson at the  
688 MRC LMB Biophysics facility for performing the SEC-MALS assay on Heimdall Vps22. TH, HH, MB,  
689 RS, JL, D Tamarit, TE, DPS and BB received support from a Wellcome Trust collaborative award  
690 (203276/Z/16/Z). BB and DPS were supported by the MRC. DT was supported by the Swedish Research  
691 Council (International Postdoc grant 2018-06609).

692

## 693 **AUTHOR CONTRIBUTIONS**

694

695 TH, BB, NR, MB conceived and integrated the overall study.  
696 TH, SP, NR, DPS, D Tamarit, RS made all figures.  
697 TH, MB, NR, DPS, D Tamarit, and BB wrote the first draft of the manuscript  
698 All authors contributed to reading and revising the manuscript.  
699 TH (under supervision of MB): carried out all Heimdall experiments in Figures 2 and 3 (except for SEC-  
700 MALS: DPS- and the analysis of mass spectrometry-HH), all iTASSER modelling of Heimdall proteins,  
701 and helped make Y2H plasmids, and carried out preliminary phylogenetic analysis.  
702 SP (under supervision of MB): made most plasmids for Y2H and carried out the entire pairwise Y2H  
703 screen.  
704 DP (under supervision of NR): Expressed and purified the Odinarchaeota ESCRT proteins (with AH,  
705 WX, AP, MM and NR), performed the CD analyses (with MM and DT), the Odin SEC-MALS analyses  
706 (with NR and DR) performed the ESCRT-II molecular modelling (with NR) and designed and purified  
707 Vps25 constructs for crystallography (with NR).  
708 DPS (under supervision of BB): Expressed, purified, and carried out the analytical gel filtration on  
709 Heimdall Vps22, collected sequences for phylogenetic studies and helped in the bioinformatics analyses  
710 of D Tamarit.  
711 RS (under supervision of JL): solved the structure of Vps25  
712 D Tamarit (under supervision of TE): performed all genomic and phylogenetic analyses.  
713 HMAH: Processed and analyzed XL-MS data.  
714 **SP, DP, DPS, RS and D Tamarit contributed equally to this work and are listed alphabetically.**

715

## 716 **FIGURE LEGENDS**

717

718 **Figure 1. The ASGARD archaea, Lokiarchaeota, Heimdallarchaeota, Helarchaeota, and**  
719 **Odinarchaeota, have genes that comprise the ubiquitin-ESCRT pathway.**

720

721 (A) List of proteins in the Asgard archaea and eukaryotic Ubiquitin-ESCRT (Ub-ESCRT) pathway.

722

723 (B) Co-location of Ub/ESCRT protein-encoding genes in Heimdall- (i; 22 genomes), Hel- (ii; 9 genomes),  
724 Loki- (iii; 29 genomes) and Thorarchaeota (iv; 30 genomes). A colour gradient indicates the fraction of  
725 genomes in which a pair of genes was found to co-locate at less than 10 kb, and white cells indicate  
726 gene pairs found to never co-exist in any genome of the same phylum.

727  
728 (C) Synteny plot of selected genomes. Arrows represent genes and are coloured if their products were  
729 annotated as containing diagnostic domains for Ub/ESCRT proteins (see Methods). Genes encoding  
730 Vps23/37 in the vicinity of the ESCRT gene cluster in Helarchaeote Hel\_GB\_B, Heimdallarchaeote  
731 B3\_Heim and Odinarchaeote LCB\_4 were only found to contain E2 domains, but were deemed  
732 Vps23/37 through alignment (Suppl. Fig. X). A gene encoding a fusion of Vps23/37 and Vps28 is colored  
733 as both orange and red. Genome regions are plotted at 2 kb of ubiquitin or ESCRT protein-encoding  
734 genes (coloured), or until a contig boundary (thicker vertical lines). Similarity lines indicate best-  
735 reciprocal BLAST-p (Altschul et al 1990 J Mol Biol 215: 403-410) hits with an e-value lower than 1e-5.  
736 The names of the organisms used for experimental analyses in later sections are marked in orange.

737  
738 (D) Phylogenetic reconstruction of Vps22 and Vps36. Unrooted maximum likelihood phylogenetic tree  
739 of Vps22 (blue), Vps36 (purple) and Vps25 (orange) and outgroup (black) sequences. The tree was  
740 reconstructed using IQ-Tree under the LG+C60+R4+F model. Support values are only shown for the  
741 deeper branches connecting gene homologs and represent standard Felsenstein bootstrap proportions  
742 (upper left) or transfer-bootstrap expectation (TBE) (lower right) values based on 100 bootstrap  
743 pseudoreplicates. The full tree with all leaf and support labels is shown in Suppl. Figure X.

744  
745 (E) Phylogenetic reconstruction of UEV domain-containing proteins and E2 ubiquitin-conjugating  
746 enzymes. Unrooted maximum likelihood phylogenetic tree of the UEV domain-containing proteins  
747 (orange, red) and E2 ubiquitin-conjugating proteins (gray, black) in Eukarya and Asgard archaea. The  
748 tree was reconstructed using IQ-Tree under the Q.pfam+C20+G4+F+PMSF model. Support values are  
749 only shown for the deeper branches, following the same pattern as in (D).

750  
751 **Figure 2. Assembly of Asgard ESCRT-I complexes with ubiquitin binding to the UEV domain of**  
752 **Vps23(TSG101).**

753  
754 (A) Schematic diagram of the domain structure of HeimAB125 Vps28 and the truncation design used in  
755 the experiments. The N-terminal ubiquitin E2 variant domain ("UEV") and the core domain of Vps28  
756 ("Vps28") identified previously are highlighted.

757  
758 (B) A model of the three-dimensional structure of HeimAB125 UEV. The three-dimensional structure  
759 model was created by templating the structure of the budding yeast Vps23 bound to ubiquitin. Vps23  
760 (PDB: 1UZXa, light green) and HeimAB125 UEV (model structure, purple) are superimposed. Ubiquitin  
761 bound to Vps23 (PDB: 1UZXb) is shown in yellow. Two ubiquitin-binding "arms" of Vps23, "beta-hairpin  
762 Tongue" and "Lip" are highlighted by circles with dashed lines.

763  
764 (C) The three-dimensional structure model of HeimAB125 Ubiquitin was created and superimposed with  
765 the structure of Ubiquitin in complex with Vps23 (PDB: 1UZXb). Ubiquitin (PDB: 1UZXb, yellow), model  
766 structure of HeimAB125 Ubiquitin (light blue), Vps23 (PDB: 1UZXa, light green) were shown. An amino  
767 acid residue (Val45) on the model structure located in the Ubiquitin hydrophobic patch, which is  
768 important for Ubiquitin-UEV interactions, is highlighted in magenta. The structure of HeimAB125  
769 ubiquitin is illustrated in the ribbon diagram (i) and the surface model (ii).

770  
771 (D) HeimAB125 UEV binds ubiquitin in a manner dependent on a hydrophobic patch. The interaction  
772 between HeimAB125 Ubiquitin (wild-type or V45D mutant) and UEV-Vps28 (full-length, top panel) or  
773 UEV domain (bottom panel) was tested by BS3-mediated chemical cross-linking, followed by SDS-  
774 PAGE to detect the changes in their molecular weight.

775

776 (E) Size-exclusion chromatography analysis of the Odinarchaeota ESCRT-I subcomplex assembly.  
777 Physical interaction between the *Odinarchaeota* ESCRT-I subcomplex and ubiquitin as demonstrated  
778 by size exclusion chromatography. From Top to Bottom: Vps28 protein only (top); Vps23(TSG101)  
779 protein only; ubiquitin only; Vps28 pre-incubated with ubiquitin (no interaction); Vps23 (TSG101) pre-  
780 incubated with Vps28 (stable complex formation); Vps23 (TSG101) pre-incubated with Vps28 and  
781 ubiquitin (bottom – ubiquitin binds to the Vps23(TSG101)/Vps28 complex, via the UEV domain of  
782 Vps23(TSG101). For additional controls see Supplementary Figure S10). All proteins were separated  
783 on a Superdex S200 HR 10/300 size exclusion chromatography column. The relative elution volumes  
784 of the size standards  $\beta$ -amylase (200 kDa), alcohol dehydrogenase (150 kDa), bovine serum albumin  
785 (BSA) (66 kDa) and carbonic anhydrase (29 kDa) and cytochrome-c (12.4 kDa) are also indicated (in  
786 grey). Eluted fractions were resolved by SDS-PAGE and visualised by Coomassie stain. Left:  
787 chromatography UV traces (at 280 nm) for the respective elution profiles.  
788  
789  
790

### 791 **Figure 3. Heimdall Vps22 forms stable dimers.**

792  
793 (A) Elution chromatogram of Vps22 (27.9 kDa) using a Superdex 200 16/600 size exclusion column.  
794 The inset shows the column calibration curve established with standard proteins (see Methods section).  
795 Grey lines indicate the  $V_e/V_o$  and predicted molar mass (85 kDa) of Vps22. This assay suggests that  
796 this protein forms a trimer or an elongated dimer.  
797  
798 (B) SEC-MALS analysis of Heimdall Vps22 using a Superdex 200 increase 10/300 analytical column.  
799 The chromatograms display the calculated molar mass of the peaks (kDa) and refractive indexes (A.U.)  
800 as dots and lines, respectively, for loaded sample concentrations of 2.0 (blue) and 0.5 (red) mg/ml. The  
801 estimated masses are 54.4 and 54.2 kDa for the two protein concentrations, indicating stable formation  
802 of a Vps22 dimer, as the theoretical dimer mass is 55.9 kDa.  
803  
804 (C) Purified HeimAB125 Vps22 showed slower migration on SDS-PAGE gel by chemical crosslinking,  
805 whose mobility is consistent with that of a cross-linked dimer.  
806  
807 (D and E) A model structure of HeimAB125 Vps22 superimposed on Vps22 in the structure of ESCRT-  
808 II complex (3CUQ). Side chains of dimerized peptide around 160:166 aa (ii) and 41-47 aa (ii) on the  
809 Vps22 model structure were shown in the panel. The cross-linked positions on the peptide sequence  
810 were highlighted in red.  
811  
812

### 813 **Figure 4. Crystal structure of the Odinarchaeota Vps25 $\Delta$ N tandem winged helix (WH) domain.**

814  
815 (A) Archaeal Vps25 $\Delta$ N tandem WH domain structure coloured from blue to red (N-terminus to C-  
816 terminus) shown in ribbon form, with secondary structural sequence elements indicated.  
817  
818 (B) Structural alignment of the Odinarchaeota Vps25 $\Delta$ N (red) with Vps25 from *S. cerevisiae* (green)  
819 (PDB: 1XB4) and *H. sapiens* (blue) (PDB: 2ZME).  
820  
821 (C) Superposition of the N- (blue) and C-terminal (pink) archaeal Vps25 WH domains. Refinement and  
822 model statistics are shown in Supplementary Table 1.  
823

### 824 **Figure 5. Systematic reciprocal Yeast two-hybrid assays between Asgard ESCRT proteins and** 825 **new insight gained from investigating ESCRT from Asgard.**

826  
827 (A) Summary of Y2H interactions. Molecules related to the Ub-ESCRT pathway found in  
828 Lokiarchaeota (Lokiarch), Heimdallarchaeota (HeimAB125), Thorarchaeota, and



829 Odinaeaeota (OdiLCB4) were examined comprehensively using Y2H, and the detected  
830 interactions are illustrated (see also Figure S6 for the individual results)

831

832 (B) Schematic representation of the arrangement of the Asgard ESCRT pathway based on this  
833 work. In the Heimdallarcheota and Lokiarchaeota ESCRT-II complexes the Vps22 subunit  
834 forms a homodimer comparable to the eukaryotic Vps22/Vps36 ESCRT-II heterodimeric stalk.  
835 In Odinaeaeota, however, the Vps22 homologue does not appear to dimerize and as yet  
836 undetermined factor therefore likely bridges the interaction between the ESCRT-I and -II  
837 subcomplexes. The Odinaeaeota Vps23 homologue forms a dimer thereby presenting two  
838 ubiquitin-binding UEV domains. The Vps23 dimer interacts with a single Vps28 protein thus  
839 forming a tripartite complex, reminiscent of the eukaryotic Vps37/Vps23/Vps28 complex. In  
840 Heimdallarcheota the Vps23 and Vps28 functions are fused in a single protein that also  
841 dimerises. Compare with the eukaryotic arrangement as shown in Supplementary Figure S1.

842

843

844

## 845 References

846

- 847 1 Henne, W. M., Buchkovich, N. J. & Emr, S. D. in *Developmental Cell* Vol. 21 77-91 (Cell Press,  
848 2011).
- 849 2 Piper, R. C., Cooper, A. A., Yang, H. & Stevens, T. H. VPS27 controls vacuolar and endocytic  
850 traffic through a prevacuolar compartment in *Saccharomyces cerevisiae*. *The Journal of cell*  
851 *biology* **131**, 603-617, doi:10.1083/jcb.131.3.603 (1995).
- 852 3 Li, Y., Kane, T., Tipper, C., Spatrick, P. & Jenness, D. D. Yeast mutants affecting possible quality  
853 control of plasma membrane proteins. *Molecular and cellular biology* **19**, 3588-3599,  
854 doi:10.1128/mcb.19.5.3588 (1999).
- 855 4 Rieder, S. E., Banta, L. M., Köhrer, K., McCaffery, J. M. & Emr, S. D. Multilamellar endosome-  
856 like compartment accumulates in the yeast vps28 vacuolar protein sorting mutant. *Molecular*  
857 *Biology of the Cell* **7**, 985-999, doi:10.1091/mbc.7.6.985 (1996).
- 858 5 Babst, M., Odorizzi, G., Estepa, E. J. & Emr, S. D. Mammalian Tumor Susceptibility Gene 101  
859 (TSG101) and the Yeast Homologue, Vps23p, Both Function in Late Endosomal Trafficking.  
860 *Traffic* **1**, 248-258, doi:10.1034/j.1600-0854.2000.010307.x (2000).
- 861 6 Munn, A. L. & Riezman, H. Endocytosis is required for the growth of vacuolar H(+)-ATPase-  
862 defective yeast: identification of six new END genes. *The Journal of Cell Biology* **127**, 373-386,  
863 doi:10.1083/jcb.127.2.373 (1994).
- 864 7 Nothwehr, S. F., Bryant, N. J. & Stevens, T. H. The Newly Identified Yeast GRD Genes Are  
865 Required for Retention of Late-Golgi Membrane Proteins. Report No. 9740312292, 2700-2707  
866 (1996).
- 867 8 Babst, M., Sato, T. K., Banta, L. M. & Emr, S. D. Endosomal transport function in yeast requires  
868 a novel AAA-type ATPase, Vps4p. *EMBO Journal* **16**, 1820-1831, doi:10.1093/emboj/16.8.1820  
869 (1997).
- 870 9 Katzmman, D. J., Babst, M. & Emr, S. D. Ubiquitin-dependent sorting into the multivesicular body  
871 pathway requires the function of a conserved endosomal protein sorting complex, ESCRT-I. *Cell*  
872 **106**, 145-155, doi:10.1016/S0092-8674(01)00434-2 (2001).
- 873 10 Kranz, A., Kinner, A. & Kölling, R. A Family of Small Coiled-Coil-forming Proteins Functioning  
874 at the Late Endosome in Yeast. *Molecular Biology of the Cell* **12**, 711-723,  
875 doi:10.1091/mbc.12.3.711 (2001).
- 876 11 Babst, M., Katzmman, D. J., Snyder, W. B., Wendland, B. & Emr, S. D. Endosome-associated  
877 complex, ESCRT-II, recruits transport machinery for protein sorting at the multivesicular body.  
878 *Developmental cell* **3**, 283-289, doi:10.1016/S1534-5807(02)00219-8 (2002).

- 879 12 Katzmann, D. J., Stefan, C. J., Babst, M. & Emr, S. D. Vps27 recruits ESCRT machinery to  
880 endosomes during MVB sorting. *The Journal of Cell Biology* **162**, 413-423,  
881 doi:10.1083/JCB.200302136 (2003).
- 882 13 Bilodeau, P. S., Winistorfer, S. C., Kearney, W. R., Robertson, A. D. & Piper, R. C. Vps27-Hse1  
883 and ESCRT-I complexes cooperate to increase efficiency of sorting ubiquitinated proteins at the  
884 endosome. *J Cell Biol* **163**, 237-243, doi:10.1083/jcb.200305007 (2003).
- 885 14 Shih, S. C. *et al.* Epsins and Vps27p/Hrs contain ubiquitin-binding domains that function in  
886 receptor endocytosis. *Nature Cell Biology* **4**, 389-393, doi:10.1038/ncb790 (2002).
- 887 15 Odorizzi, G., Babst, M. & Emr, S. D. Fab1p PtdIns(3)P 5-Kinase Function Essential for Protein  
888 Sorting in the Multivesicular Body. *Cell* **95**, 847-858, doi:10.1016/S0092-8674(00)81707-9  
889 (1998).
- 890 16 von Schwedler, U. K. *et al.* The protein network of HIV budding. *Cell* **114**, 701-713,  
891 doi:10.1016/S0092-8674(03)00714-1 (2003).
- 892 17 Strack, B., Calistri, A., Craig, S., Popova, E. & Göttlinger, H. G. AIP1/ALIX is a binding partner  
893 for HIV-1 p6 and EIAV p9 functioning in virus budding. *Cell* **114**, 689-699, doi:10.1016/S0092-  
894 8674(03)00653-6 (2003).
- 895 18 Martin-Serrano, J., Yarovoy, A., Perez-Caballero, D., Bieniasz, P. D. & Yaravoy, A. Divergent  
896 retroviral late-budding domains recruit vacuolar protein sorting factors by using alternative  
897 adaptor proteins. *Proceedings of the National Academy of Sciences of the United States of*  
898 *America* **100**, 12414-12419, doi:10.1073/pnas.2133846100 (2003).
- 899 19 Carlton, J. G. & Martin-Serrano, J. Parallels between cytokinesis and retroviral budding: a role  
900 for the ESCRT machinery. *Science (New York, N.Y.)* **316**, 1908-1912,  
901 doi:10.1126/science.1143422 (2007).
- 902 20 Morita, E. *et al.* Human ESCRT and ALIX proteins interact with proteins of the midbody and  
903 function in cytokinesis. *The EMBO Journal* **26**, 4215-4227, doi:10.1038/SJ.EMBOJ.7601850  
904 (2007).
- 905 21 VerPlank, L. *et al.* Tsg101, a homologue of ubiquitin-conjugating (E2) enzymes, binds the L  
906 domain in HIV type 1 Pr55Gag. *Proceedings of the National Academy of Sciences* **98**, 7724-  
907 7729, doi:10.1073/PNAS.131059198 (2001).
- 908 22 Martin-Serrano, J., Zang, T. & Bieniasz, P. D. HIV-1 and Ebola virus encode small peptide motifs  
909 that recruit Tsg101 to sites of particle assembly to facilitate egress. *Nature Medicine* **7**, 1313-  
910 1319, doi:10.1038/nm1201-1313 (2001).
- 911 23 Skowrya, M. L., Schlesinger, P. H., Naismith, T. V. & Hanson, P. I. Triggered recruitment of  
912 ESCRT machinery promotes endolysosomal repair. *Science (New York, N.Y.)* **360**, eaar5078-  
913 eaar5078, doi:10.1126/science.aar5078 (2018).
- 914 24 Jimenez, A. J. *et al.* ESCRT machinery is required for plasma membrane repair. *Science (New*  
915 *York, N.Y.)* **343**, 1247136-1247136, doi:10.1126/science.1247136 (2014).
- 916 25 Scheffer, L. L. *et al.* Mechanism of Ca<sup>2+</sup>-triggered ESCRT assembly and regulation of cell  
917 membrane repair. *Nature Communications* **5**, 5646-5646, doi:10.1038/ncomms6646 (2014).
- 918 26 Choi, H. W. *et al.* Perivascular dendritic cells elicit anaphylaxis by relaying allergens to mast cells  
919 via microvesicles. *Science (New York, N.Y.)* **362**, eaao0666-eaao0666,  
920 doi:10.1126/science.aao0666 (2018).
- 921 27 Vietri, M. *et al.* Spastin and ESCRT-III coordinate mitotic spindle disassembly and nuclear  
922 envelope sealing. *Nature* **522**, 231-235, doi:10.1038/nature14408 (2015).
- 923 28 Zhang, H. *et al.* Endocytic Pathways Downregulate the L1-type Cell Adhesion Molecule  
924 Neuroglian to Promote Dendrite Pruning in Drosophila. *Developmental Cell* **30**, 463-478,  
925 doi:10.1016/j.devcel.2014.06.014 (2014).
- 926 29 Loncle, N., Agromayor, M., Martin-Serrano, J. & Williams, D. W. An ESCRT module is required  
927 for neuron pruning. *Scientific Reports* **5**, 8461-8461, doi:10.1038/srep08461 (2015).
- 928 30 Matusek, T. *et al.* The ESCRT machinery regulates the secretion and long-range activity of  
929 Hedgehog. *Nature* **516**, 99-103, doi:10.1038/nature13847 (2014).
- 930 31 Olmos, Y., Hodgson, L., Mantell, J., Verkade, P. & Carlton, J. G. ESCRT-III controls nuclear  
931 envelope reformation. *Nature* **522**, 236-239, doi:10.1038/nature14503 (2015).

- 932 32 Denais, C. M. *et al.* Nuclear envelope rupture and repair during cancer cell migration. *Science*  
933 **352**, 353-358, doi:10.1126/science.aad7297 (2016).
- 934 33 Raab, M. *et al.* ESCRT III repairs nuclear envelope ruptures during cell migration to limit DNA  
935 damage and cell death. *Science* **352**, 359-362, doi:10.1126/science.aad7611 (2016).
- 936 34 Frost, A. *et al.* Functional repurposing revealed by comparing *S. pombe* and *S. cerevisiae*  
937 genetic interactions. *Cell* **149**, 1339-1352, doi:10.1016/j.cell.2012.04.028 (2012).
- 938 35 Webster, B. M., Colombi, P., Jäger, J. & Patrick Lusk, C. Surveillance of nuclear pore complex  
939 assembly by ESCRT-III/Vps4. *Cell* **159**, 388-401, doi:10.1016/j.cell.2014.09.012 (2014).
- 940 36 Zhou, F. *et al.* Rab5-dependent autophagosome closure by ESCRT. *Journal of Cell Biology* **218**,  
941 1908-1927, doi:10.1083/JCB.201811173 (2019).
- 942 37 Takahashi, Y. *et al.* An autophagy assay reveals the ESCRT-III component CHMP2A as a  
943 regulator of phagophore closure. *Nature Communications* **9**, 1-13, doi:10.1038/s41467-018-  
944 05254-w (2018).
- 945 38 Sahu, R. *et al.* Microautophagy of Cytosolic Proteins by Late Endosomes. *Developmental Cell*  
946 **20**, 131-139, doi:10.1016/j.devcel.2010.12.003 (2011).
- 947 39 Radulovic, M. *et al.* ESCRT-mediated lysosome repair precedes lysophagy and  
948 promotes cell survival. *The EMBO Journal* **37**, e99753-e99753, doi:10.15252/emboj.201899753  
949 (2018).
- 950 40 Raiborg, C. & Stenmark, H. in *Nature* Vol. 458 445-452 (Nature Publishing Group, 2009).
- 951 41 Raiborg, C. *et al.* Hrs sorts ubiquitinated proteins into clathrin-coated microdomains of early  
952 endosomes. *Nature Cell Biology* **4**, 394-398, doi:10.1038/ncb791 (2002).
- 953 42 Bilodeau, P. S., Urbanowski, J. L., Winistorfer, S. C. & Piper, R. C. The Vps27p-Hse1p complex  
954 binds ubiquitin and mediates endosomal protein sorting. *Nature Cell Biology* **4**, 534-539,  
955 doi:10.1038/ncb815 (2002).
- 956 43 Babst, M., Wendland, B., Estepa, E. J. & Emr, S. D. The Vps4p AAA ATPase regulates  
957 membrane association of a Vps protein complex required for normal endosome function. *EMBO*  
958 *Journal* **17**, 2982-2993, doi:10.1093/emboj/17.11.2982 (1998).
- 959 44 Babst, M., Katzmann, D. J., Estepa-Sabal, E. J., Meerloo, T. & Emr, S. D. ESCRT-III: An  
960 endosome-associated heterooligomeric protein complex required for MVB sorting.  
961 *Developmental Cell* **3**, 271-282, doi:10.1016/S1534-5807(02)00220-4 (2002).
- 962 45 Hanson, P. I., Roth, R., Lin, Y. & Heuser, J. E. Plasma membrane deformation by circular arrays  
963 of ESCRT-III protein filaments. *The Journal of Cell Biology* **180**, 389-402,  
964 doi:10.1083/JCB.200707031 (2008).
- 965 46 Teis, D., Saksena, S. & Emr, S. D. Ordered Assembly of the ESCRT-III Complex on Endosomes  
966 Is Required to Sequester Cargo during MVB Formation. *Developmental Cell* **15**, 578-589,  
967 doi:10.1016/J.DEVCEL.2008.08.013 (2008).
- 968 47 Lata, S. *et al.* Helical Structures of ESCRT-III Are Disassembled by VPS4. *Science* **321**, 1354-  
969 1357, doi:10.1126/SCIENCE.1161070 (2008).
- 970 48 Chiaruttini, N. *et al.* Relaxation of Loaded ESCRT-III Spiral Springs Drives Membrane  
971 Deformation. *Cell* **163**, 866-879, doi:10.1016/j.cell.2015.10.017 (2015).
- 972 49 Mierzwa, B. E. *et al.* Dynamic subunit turnover in ESCRT-III assemblies is regulated by Vps4 to  
973 mediate membrane remodelling during cytokinesis. *Nature Cell Biology* **19**, 787-798,  
974 doi:10.1038/ncb3559 (2017).
- 975 50 Maity, S. *et al.* VPS4 triggers constriction and cleavage of ESCRT-III helical filaments. *Science*  
976 *Advances* **5**, eaau7198-eaau7198, doi:10.1126/sciadv.aau7198 (2019).
- 977 51 Teis, D., Saksena, S., Judson, B. L. & Emr, S. D. ESCRT-II coordinates the assembly of ESCRT-  
978 III filaments for cargo sorting and multivesicular body vesicle formation. *The EMBO Journal* **29**,  
979 871-883, doi:10.1038/emboj.2009.408 (2010).
- 980 52 Saksena, S., Wahlman, J., Teis, D., Johnson, A. E. & Emr, S. D. Functional reconstitution of  
981 ESCRT-III assembly and disassembly. *Cell* **136**, 97-109, doi:10.1016/j.cell.2008.11.013 (2009).
- 982 53 Pfitzner, A. K. *et al.* An ESCRT-III Polymerization Sequence Drives Membrane Deformation and  
983 Fission. *Cell* **182**, 1140-1155.e1118, doi:10.1016/j.cell.2020.07.021 (2020).

- 984 54 Leung, K. F., Dacks, J. B. & Field, M. C. Evolution of the Multivesicular Body ESCRT Machinery;  
985 Retention Across the Eukaryotic Lineage. *Traffic* **9**, 1698-1716, doi:10.1111/j.1600-  
986 0854.2008.00797.x (2008).
- 987 55 Obita, T. *et al.* Structural basis for selective recognition of ESCRT-III by the AAA ATPase Vps4.  
988 *Nature* **449**, 735-739, doi:10.1038/nature06171 (2007).
- 989 56 Samson, R. Y., Obita, T., Freund, S. M., Williams, R. L. & Bell, S. D. A role for the ESCRT system  
990 in cell division in archaea. *Science* **322**, 1710-1713, doi:10.1126/science.1165322 (2008).
- 991 57 Spang, A. *et al.* Complex archaea that bridge the gap between prokaryotes and eukaryotes.  
992 *Nature* **521**, 173-179, doi:10.1038/nature14447 (2015).
- 993 58 Zaremba-Niedzwiedzka, K. *et al.* Asgard archaea illuminate the origin of eukaryotic cellular  
994 complexity. *Nature*, doi:10.1038/nature21031 (2017).
- 995 59 Lindås, A.-C., Karlsson, E. A., Lindgren, M. T., Ettema, T. J. G. & Bernander, R. A unique cell  
996 division machinery in the Archaea. *Proceedings of the National Academy of Sciences of the*  
997 *United States of America* **105**, 18942-18946, doi:10.1073/pnas.0809467105 (2008).
- 998 60 Snyder, J. C., Samson, R. Y., Brumfield, S. K., Bell, S. D. & Young, M. J. Functional interplay  
999 between a virus and the ESCRT machinery in Archaea. *Proceedings of the National Academy*  
1000 *of Sciences of the United States of America* **110**, 10783-10787, doi:10.1073/pnas.1301605110  
1001 (2013).
- 1002 61 Gupta, T. K. *et al.* Structural basis for VIPP1 oligomerization and maintenance of thylakoid  
1003 membrane integrity. *Cell* **184**, 3643-3659 e3623, doi:10.1016/j.cell.2021.05.011 (2021).
- 1004 62 Junglas, B. *et al.* PspA adopts an ESCRT-III-like fold and remodels bacterial membranes. *Cell*  
1005 **184**, 3674-3688 e3618, doi:10.1016/j.cell.2021.05.042 (2021).
- 1006 63 Liu, J. *et al.* Bacterial Vipp1 and PspA are members of the ancient ESCRT-III membrane-  
1007 remodeling superfamily. *Cell* **184**, 3660-3673 e3618, doi:10.1016/j.cell.2021.05.041 (2021).
- 1008 64 Nunoura, T. *et al.* Insights into the evolution of Archaea and eukaryotic protein modifier systems  
1009 revealed by the genome of a novel archaeal group. *Nucleic Acids Research* **39**, 3204-3223,  
1010 doi:10.1093/nar/gkq1228 (2011).
- 1011 65 Hennell James, R. *et al.* Functional reconstruction of a eukaryotic-like E1/E2/(RING) E3  
1012 ubiquitylation cascade from an uncultured archaeon. *Nature Communications* **8**, 1-15,  
1013 doi:10.1038/s41467-017-01162-7 (2017).
- 1014 66 Imachi, H. *et al.* Isolation of an archaeon at the prokaryote–eukaryote interface. *Nature* **577**, 519-  
1015 525, doi:10.1038/s41586-019-1916-6 (2020).
- 1016 67 Seitz, K. W. *et al.* Asgard archaea capable of anaerobic hydrocarbon cycling. *Nature*  
1017 *Communications* **10**, 1-11, doi:10.1038/s41467-019-09364-x (2019).
- 1018 68 Gilchrist, C. L. M. & Chooi, Y.-H. clinker & clustermap.js: automatic generation of gene  
1019 cluster comparison figures. *Bioinformatics*, doi:10.1093/bioinformatics/btab007 (2021).
- 1020 69 Sancho, E. *et al.* Role of UEV-1, an Inactive Variant of the E2 UbiquitinConjugating Enzymes, in  
1021 In Vitro Differentiation and Cell Cycle Behavior of HT-29-M6 Intestinal Mucosecretory Cells.  
1022 *Molecular and Cellular Biology* **18**, 576-589, doi:10.1128/mcb.18.1.576 (1998).
- 1023 70 Roy, A., Kucukural, A. & Zhang, Y. I-TASSER: A unified platform for automated protein structure  
1024 and function prediction. *Nature Protocols* **5**, 725-738, doi:10.1038/nprot.2010.5 (2010).
- 1025 71 Yang, J. *et al.* in *Nature Methods* Vol. 12 7-8 (Nature Publishing Group, 2014).
- 1026 72 Zhang, Y. I-TASSER server for protein 3D structure prediction. *BMC Bioinformatics* **9**, 40-40,  
1027 doi:10.1186/1471-2105-9-40 (2008).
- 1028 73 Kostelansky, M. S. *et al.* Molecular architecture and functional model of the complete yeast  
1029 ESCRT-I heterotetramer. *Cell* **129**, 485-498, doi:10.1016/j.cell.2007.03.016 (2007).
- 1030 74 Teo, H. *et al.* ESCRT-I Core and ESCRT-II GLUE Domain Structures Reveal Role for GLUE in  
1031 Linking to ESCRT-I and Membranes. *Cell* **125**, 99-111, doi:10.1016/J.CELL.2006.01.047 (2006).
- 1032 75 Boura, E. *et al.* Solution structure of the ESCRT-I and -II supercomplex: implications for  
1033 membrane budding and scission. *Structure (London, England : 1993)* **20**, 874-886,  
1034 doi:10.1016/j.str.2012.03.008 (2012).

- 1035 76 Flower, T. G. *et al.* A helical assembly of human ESCRT-I scaffolds reverse-topology membrane  
1036 scission. *Nature Structural and Molecular Biology* **27**, 570-580, doi:10.1038/s41594-020-0426-4  
1037 (2020).
- 1038 77 Hierro, A. *et al.* Structure of the ESCRT-II endosomal trafficking complex. *Nature* **431**, 221-225,  
1039 doi:10.1038/nature02914 (2004).
- 1040 78 Teo, H., Perisic, O., González, B. & Williams, R. L. ESCRT-II, an endosome-associated complex  
1041 required for protein sorting: crystal structure and interactions with ESCRT-III and membranes.  
1042 *Developmental cell* **7**, 559-569, doi:10.1016/j.devcel.2004.09.003 (2004).
- 1043 79 Yang, J. *et al.* Improved protein structure prediction using predicted interresidue orientations.  
1044 *Proceedings of the National Academy of Sciences of the United States of America* **117**, 1496-  
1045 1503, doi:10.1073/pnas.1914677117 (2020).
- 1046 80 Im, Y. J. & Hurley, J. H. Integrated structural model and membrane targeting mechanism of the  
1047 human ESCRT-II complex. *Developmental cell* **14**, 902-913, doi:10.1016/j.devcel.2008.04.004  
1048 (2008).
- 1049 81 Bornberg-Bauer, E. & Albà, M. M. in *Current Opinion in Structural Biology* Vol. 23 459-466  
1050 (Elsevier Current Trends, 2013).
- 1051 82 Copley, S. D. Evolution of new enzymes by gene duplication and divergence. *The FEBS Journal*  
1052 **287**, 1262-1283, doi:10.1111/febs.15299 (2020).
- 1053 83 Hong Feng, G., Lih, C.-J. & Cohen, S. N. TSG101 Protein Steady-State Level Is Regulated  
1054 Posttranslationally by an Evolutionarily Conserved COOH-Terminal Sequence 1. 1736-1741  
1055 (2000).
- 1056 84 Hug, L. A. *et al.* Community genomic analyses constrain the distribution of metabolic traits across  
1057 the Chloroflexi phylum and indicate roles in sediment carbon cycling. *Microbiome* **1**, 22,  
1058 doi:10.1186/2049-2618-1-22 (2013).
- 1059 85 Hyatt, D. *et al.* Prodigal: prokaryotic gene recognition and translation initiation site identification.  
1060 *BMC Bioinformatics* **11**, 119, doi:10.1186/1471-2105-11-119 (2010).
- 1061 86 Altschul, S. F. *et al.* Gapped BLAST and PSI-BLAST: a new generation of protein database  
1062 search programs. *Nucleic Acids Res* **25**, 3389-3402, doi:10.1093/nar/25.17.3389 (1997).
- 1063 87 Katoh, K. & Standley, D. M. MAFFT multiple sequence alignment software version 7:  
1064 improvements in performance and usability. *Mol Biol Evol* **30**, 772-780,  
1065 doi:10.1093/molbev/mst010 (2013).
- 1066 88 Capella-Gutiérrez, S., Silla-Martínez, J. M. & Gabaldón, T. trimAl: A tool for automated alignment  
1067 trimming in large-scale phylogenetic analyses. *Bioinformatics* **25**, 1972-1973,  
1068 doi:10.1093/bioinformatics/btp348 (2009).
- 1069 89 Minh, B. Q. *et al.* IQ-TREE 2: New Models and Efficient Methods for Phylogenetic Inference in  
1070 the Genomic Era. *Mol Biol Evol* **37**, 1530-1534, doi:10.1093/molbev/msaa015 (2020).
- 1071 90 Hoang, D. T., Chernomor, O., von Haeseler, A., Minh, B. Q. & Vinh, L. S. UFBoot2: Improving  
1072 the Ultrafast Bootstrap Approximation. *Mol Biol Evol* **35**, 518-522, doi:10.1093/molbev/msx281  
1073 (2018).
- 1074 91 Jones, P. *et al.* InterProScan 5: genome-scale protein function classification. *Bioinformatics* **30**,  
1075 1236-1240, doi:10.1093/bioinformatics/btu031 (2014).
- 1076 92 Wickham, H. in *Use R!*, 1 online resource (XVI, 260 pages 232 illustrations, 140 illustrations in  
1077 color (Springer International Publishing : Imprint: Springer,, Cham, 2016).
- 1078 93 Guy, L., Kultima, J. R. & Andersson, S. G. genoPlotR: comparative gene and genome  
1079 visualization in R. *Bioinformatics* **26**, 2334-2335, doi:10.1093/bioinformatics/btq413 (2010).
- 1080 94 Baker, B. J. *et al.* Genomic inference of the metabolism of cosmopolitan subsurface Archaea,  
1081 Hadesarchaea. *Nat Microbiol* **1**, 16002, doi:10.1038/nmicrobiol.2016.2 (2016).
- 1082 95 Geissler, S. *et al.* The spindle pole body component Spc98p interacts with the gamma-tubulin-  
1083 like Tub4p of *Saccharomyces cerevisiae* at the sites of microtubule attachment. *The EMBO*  
1084 *Journal* **15**, 3899-3911, doi:10.1002/j.1460-2075.1996.tb00764.x (1996).
- 1085 96 Gyuris, J., Golemis, E., Chetkov, H. & Brent, R. Cdi1, a Human G1 and S Phase Protein  
1086 Phosphatase That Associates with Cdk2. 791-803 (1993).

- 1087 97 Kalyaanamoorthy, S., Minh, B. Q., Wong, T. K. F., von Haeseler, A. & Jermin, L. S. ModelFinder:  
1088 fast model selection for accurate phylogenetic estimates. *Nat Methods* **14**, 587-589,  
1089 doi:10.1038/nmeth.4285 (2017).
- 1090 98 Lemoine, F. *et al.* Renewing Felsenstein's phylogenetic bootstrap in the era of big data. *Nature*  
1091 **556**, 452-456, doi:10.1038/s41586-018-0043-0 (2018).
- 1092 99 Wang, H. C., Minh, B. Q., Susko, E. & Roger, A. J. Modeling Site Heterogeneity with Posterior  
1093 Mean Site Frequency Profiles Accelerates Accurate Phylogenomic Estimation. *Syst Biol* **67**, 216-  
1094 235, doi:10.1093/sysbio/syx068 (2018).
- 1095 100 Frey, S. & Görlich, D. A new set of highly efficient, tag-cleaving proteases for purifying  
1096 recombinant proteins. *Journal of Chromatography A* **1337**, 95-105,  
1097 doi:10.1016/j.chroma.2014.02.029 (2014).
- 1098 101 Liu, L., Spurrier, J., Butt, T. R. & Strickler, J. E. Enhanced protein expression in the  
1099 baculovirus/insect cell system using engineered SUMO fusions. *Protein Expr Purif* **62**, 21-28,  
1100 doi:10.1016/j.pep.2008.07.010 (2008).
- 1101 102 Micsonai, A. *et al.* BeStSel: a web server for accurate protein secondary structure prediction and  
1102 fold recognition from the circular dichroism spectra. *Nucleic Acids Res* **46**, W315-W322,  
1103 doi:10.1093/nar/gky497 (2018).
- 1104 103 Frishman, D. & Argos, P. Knowledge-based protein secondary structure assignment. *Proteins*  
1105 **23**, 566-579, doi:10.1002/prot.340230412 (1995).
- 1106 104 Stock, D., Perisic, O. & Lowe, J. Robotic nanolitre protein crystallisation at the MRC Laboratory  
1107 of Molecular Biology. *Prog Biophys Mol Biol* **88**, 311-327, doi:10.1016/j.pbiomolbio.2004.07.009  
1108 (2005).
- 1109 105 Gorrec, F. The MORPHEUS protein crystallization screen. *Journal of Applied Crystallography*  
1110 **42**, 1035-1042, doi:10.1107/S0021889809042022 (2009).
- 1111 106 Winn, M. D. *et al.* Overview of the CCP4 suite and current developments. *Acta Crystallogr D Biol*  
1112 *Crystallogr* **67**, 235-242, doi:10.1107/S0907444910045749 (2011).
- 1113 107 Long, F., Vagin, A. A., Young, P. & Murshudov, G. N. in *Acta Crystallographica Section D:*  
1114 *Biological Crystallography*. 1 edn 125-132 (International Union of Crystallography).
- 1115 108 Emsley, P., Lohkamp, B., Scott, W. G. & Cowtan, K. Features and development of Coot. *Acta*  
1116 *Crystallographica Section D: Biological Crystallography* **66**, 486-501,  
1117 doi:10.1107/S0907444910007493 (2010).
- 1118 109 Chen, V. B. *et al.* MolProbity: All-atom structure validation for macromolecular crystallography.  
1119 *Acta Crystallographica Section D: Biological Crystallography* **66**, 12-21,  
1120 doi:10.1107/S0907444909042073 (2010).
- 1121 110 Götze, M. *et al.* StavroX-A software for analyzing crosslinked products in protein interaction  
1122 studies. *Journal of the American Society for Mass Spectrometry* **23**, 76-87, doi:10.1007/s13361-  
1123 011-0261-2 (2012).
- 1124

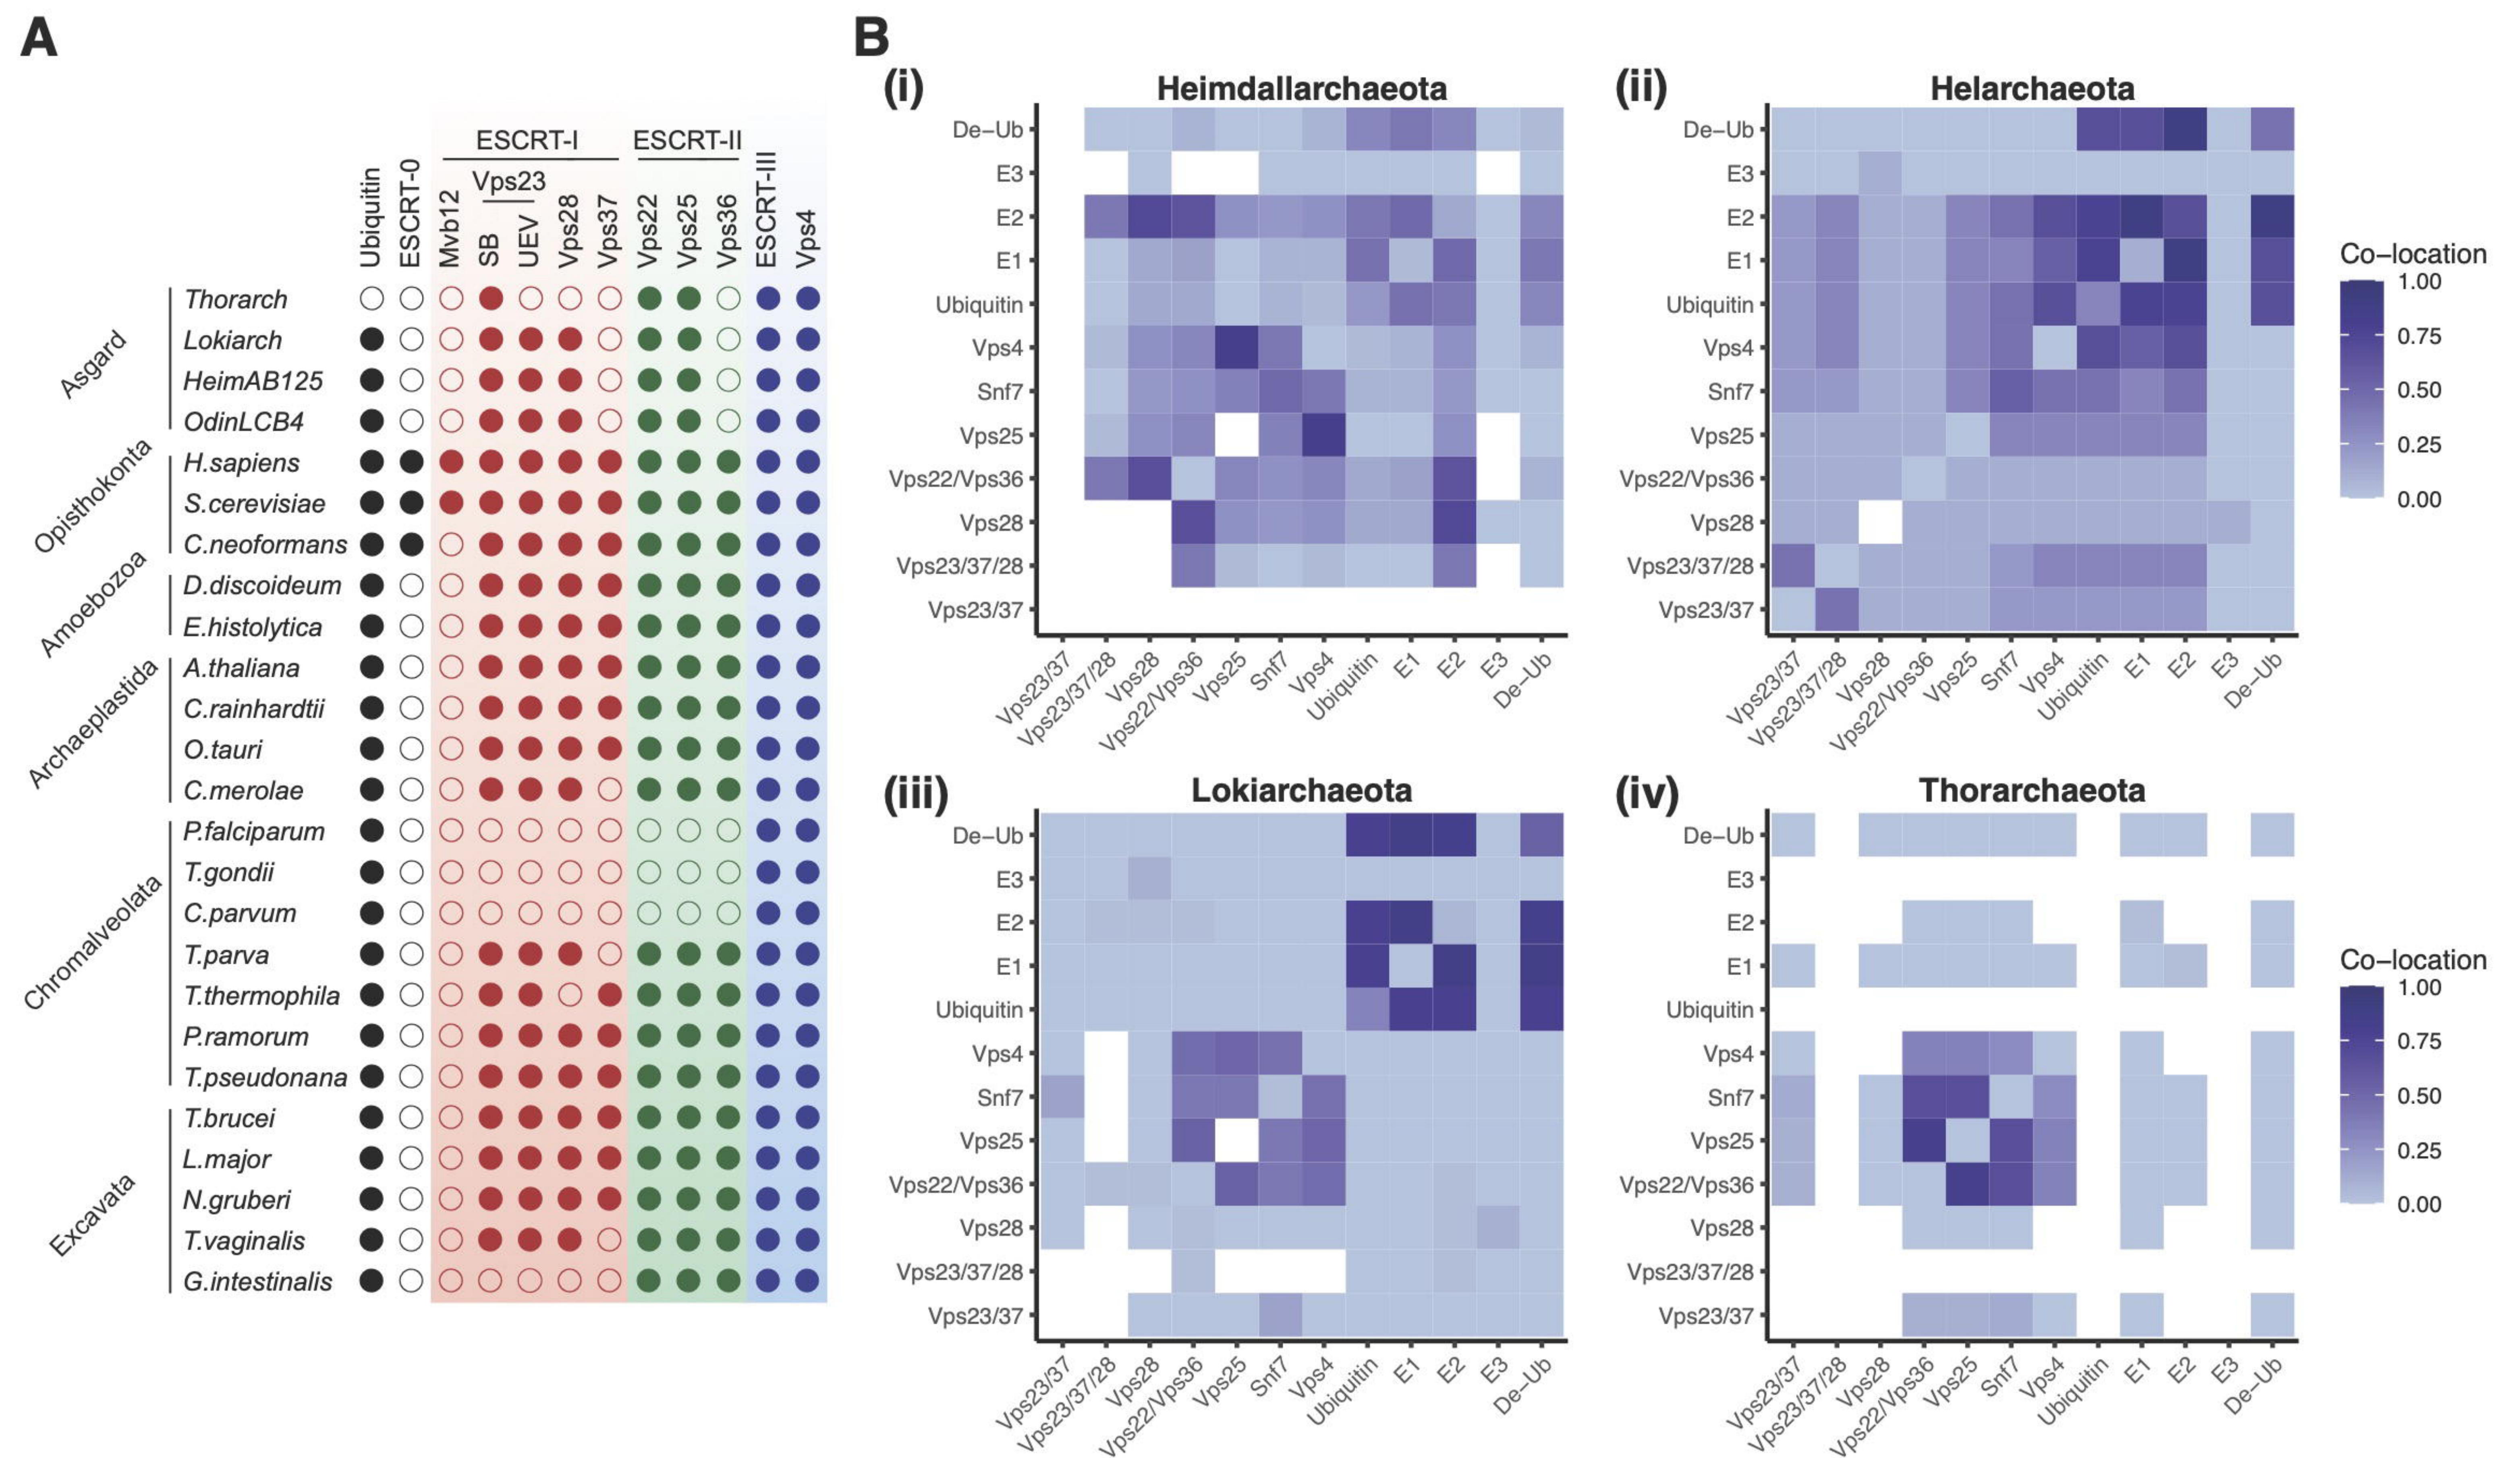

**C** **Heimdallarchaeote AB\_125**

Heimdallarchaeote B3\_Heim

Helarchaeote Hel\_GB\_B

**Lokiarchaeote GC14\_75**

*Prometheoarchaeum syntrophicum*

**Odinarchaeote LCB\_4**

**Thorarchaeote AB\_25**

Thorarchaeote L.E.AR.5

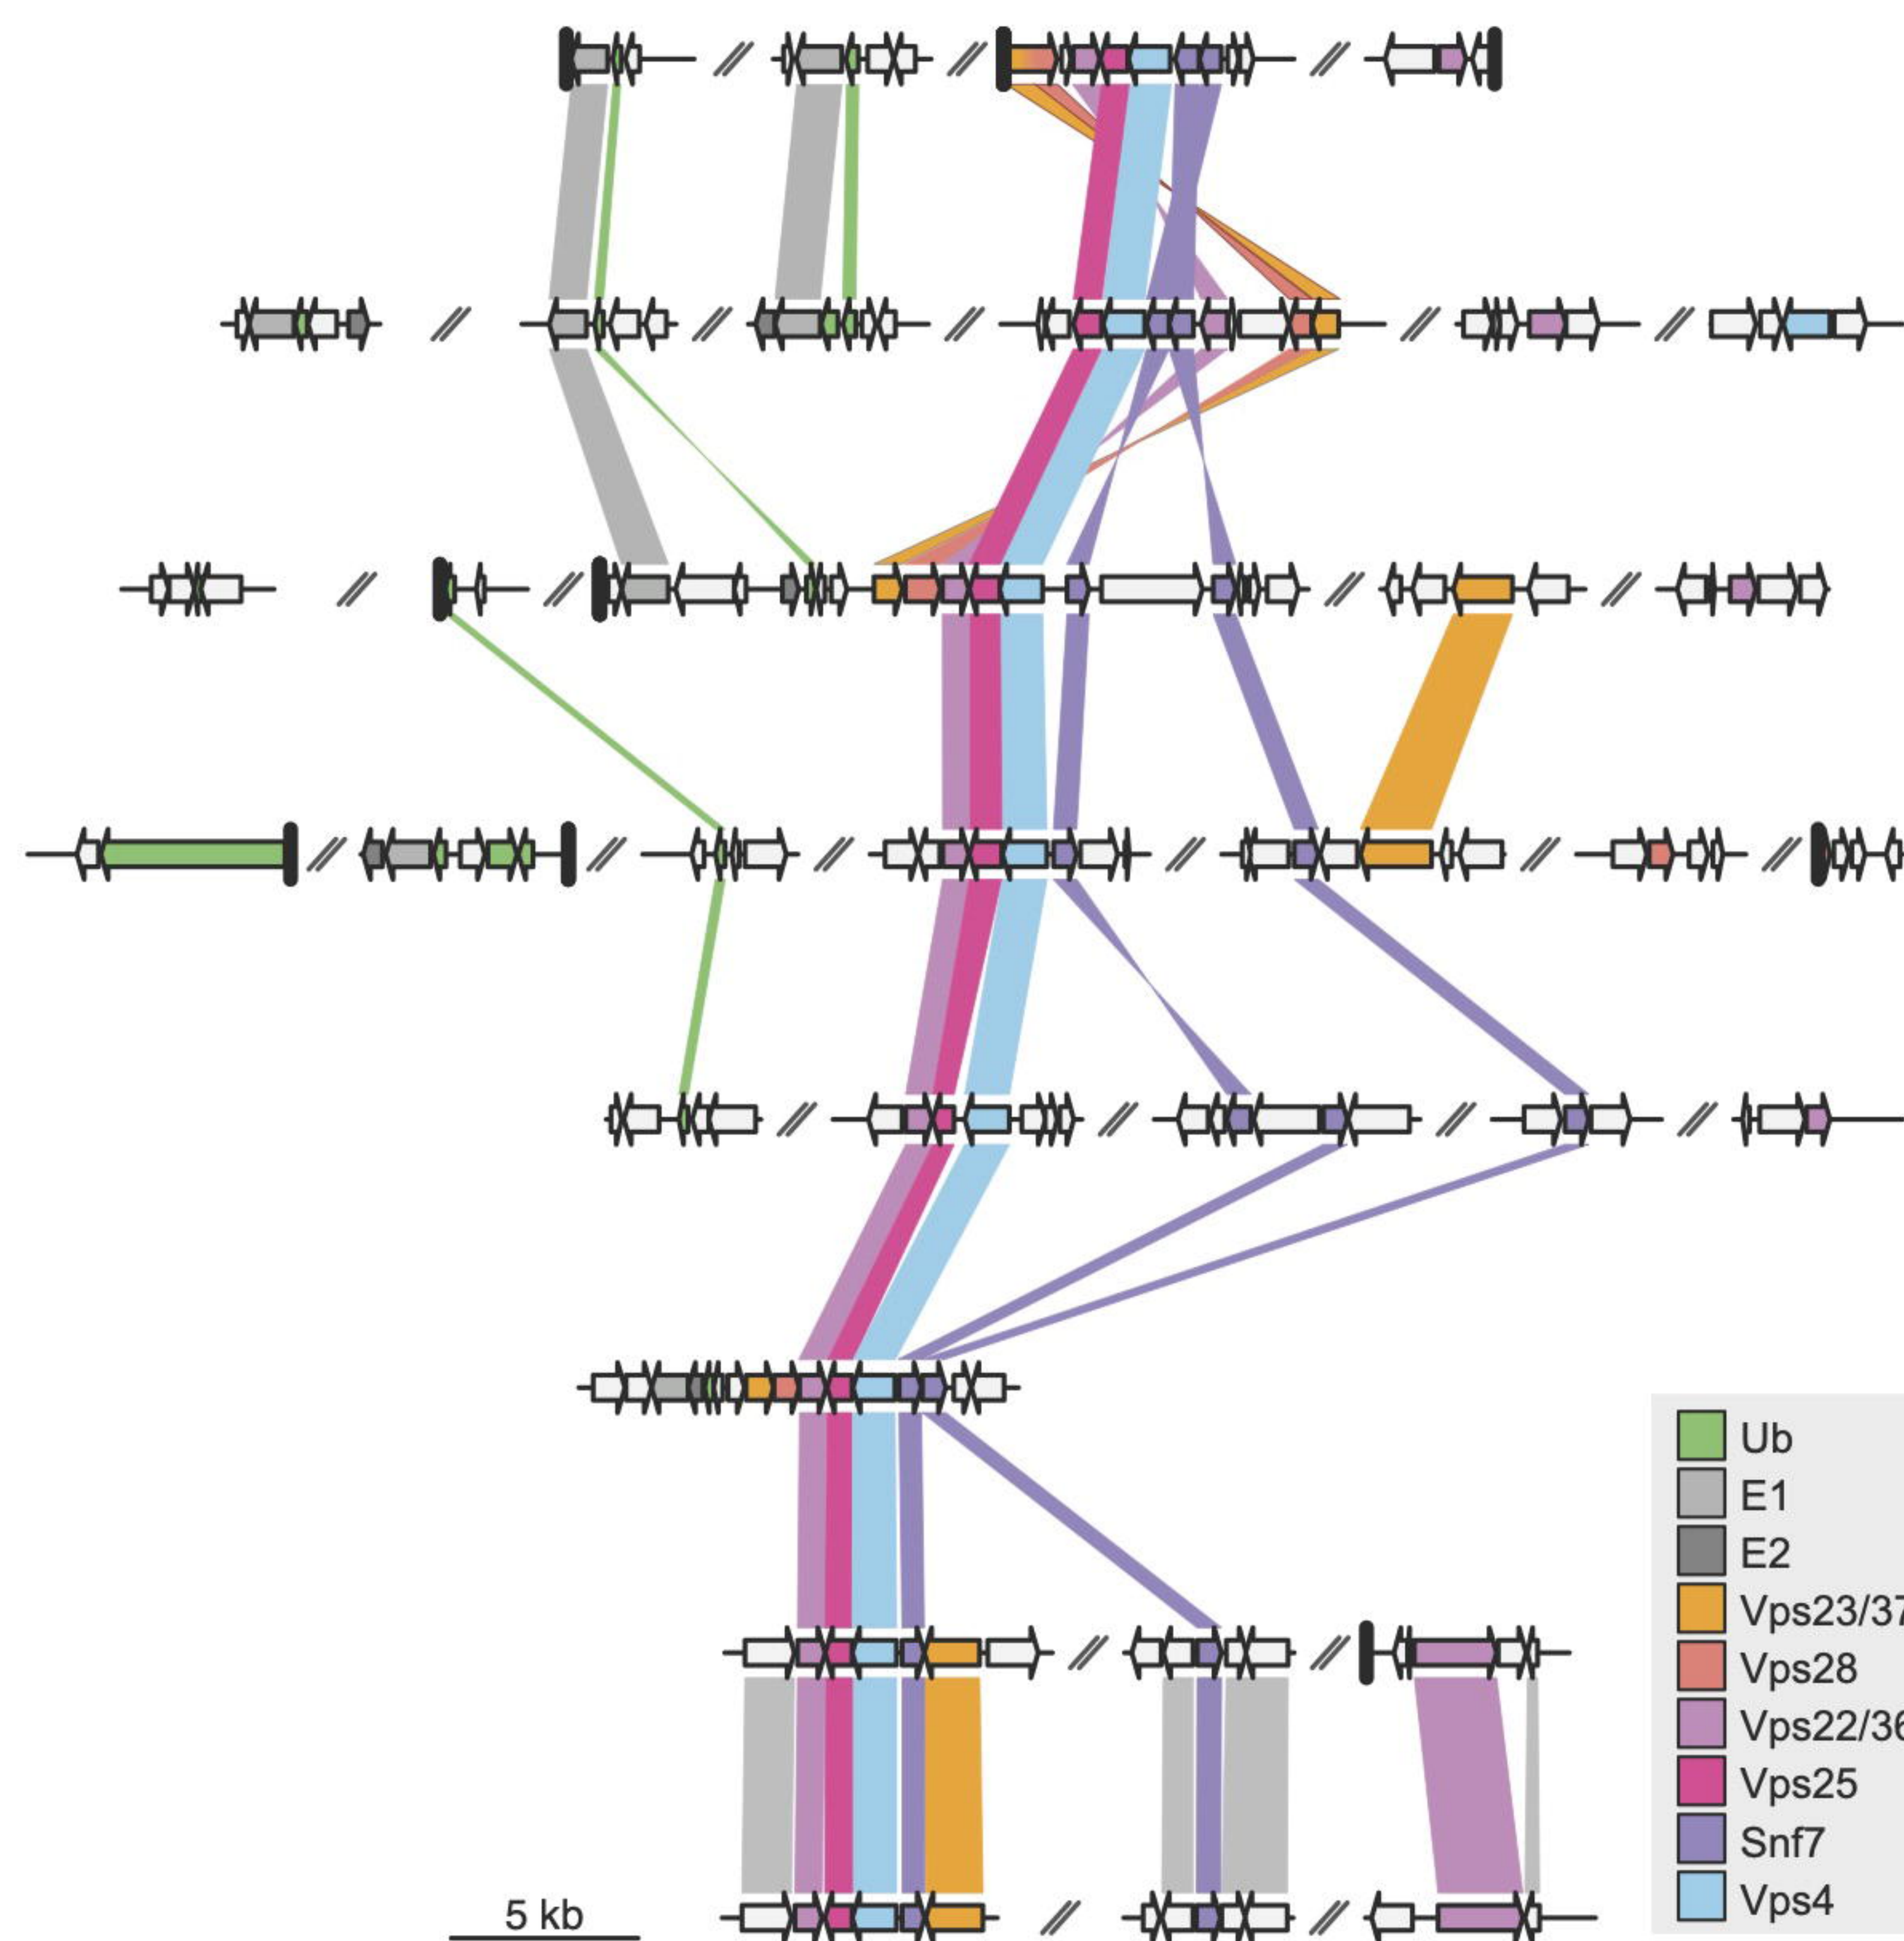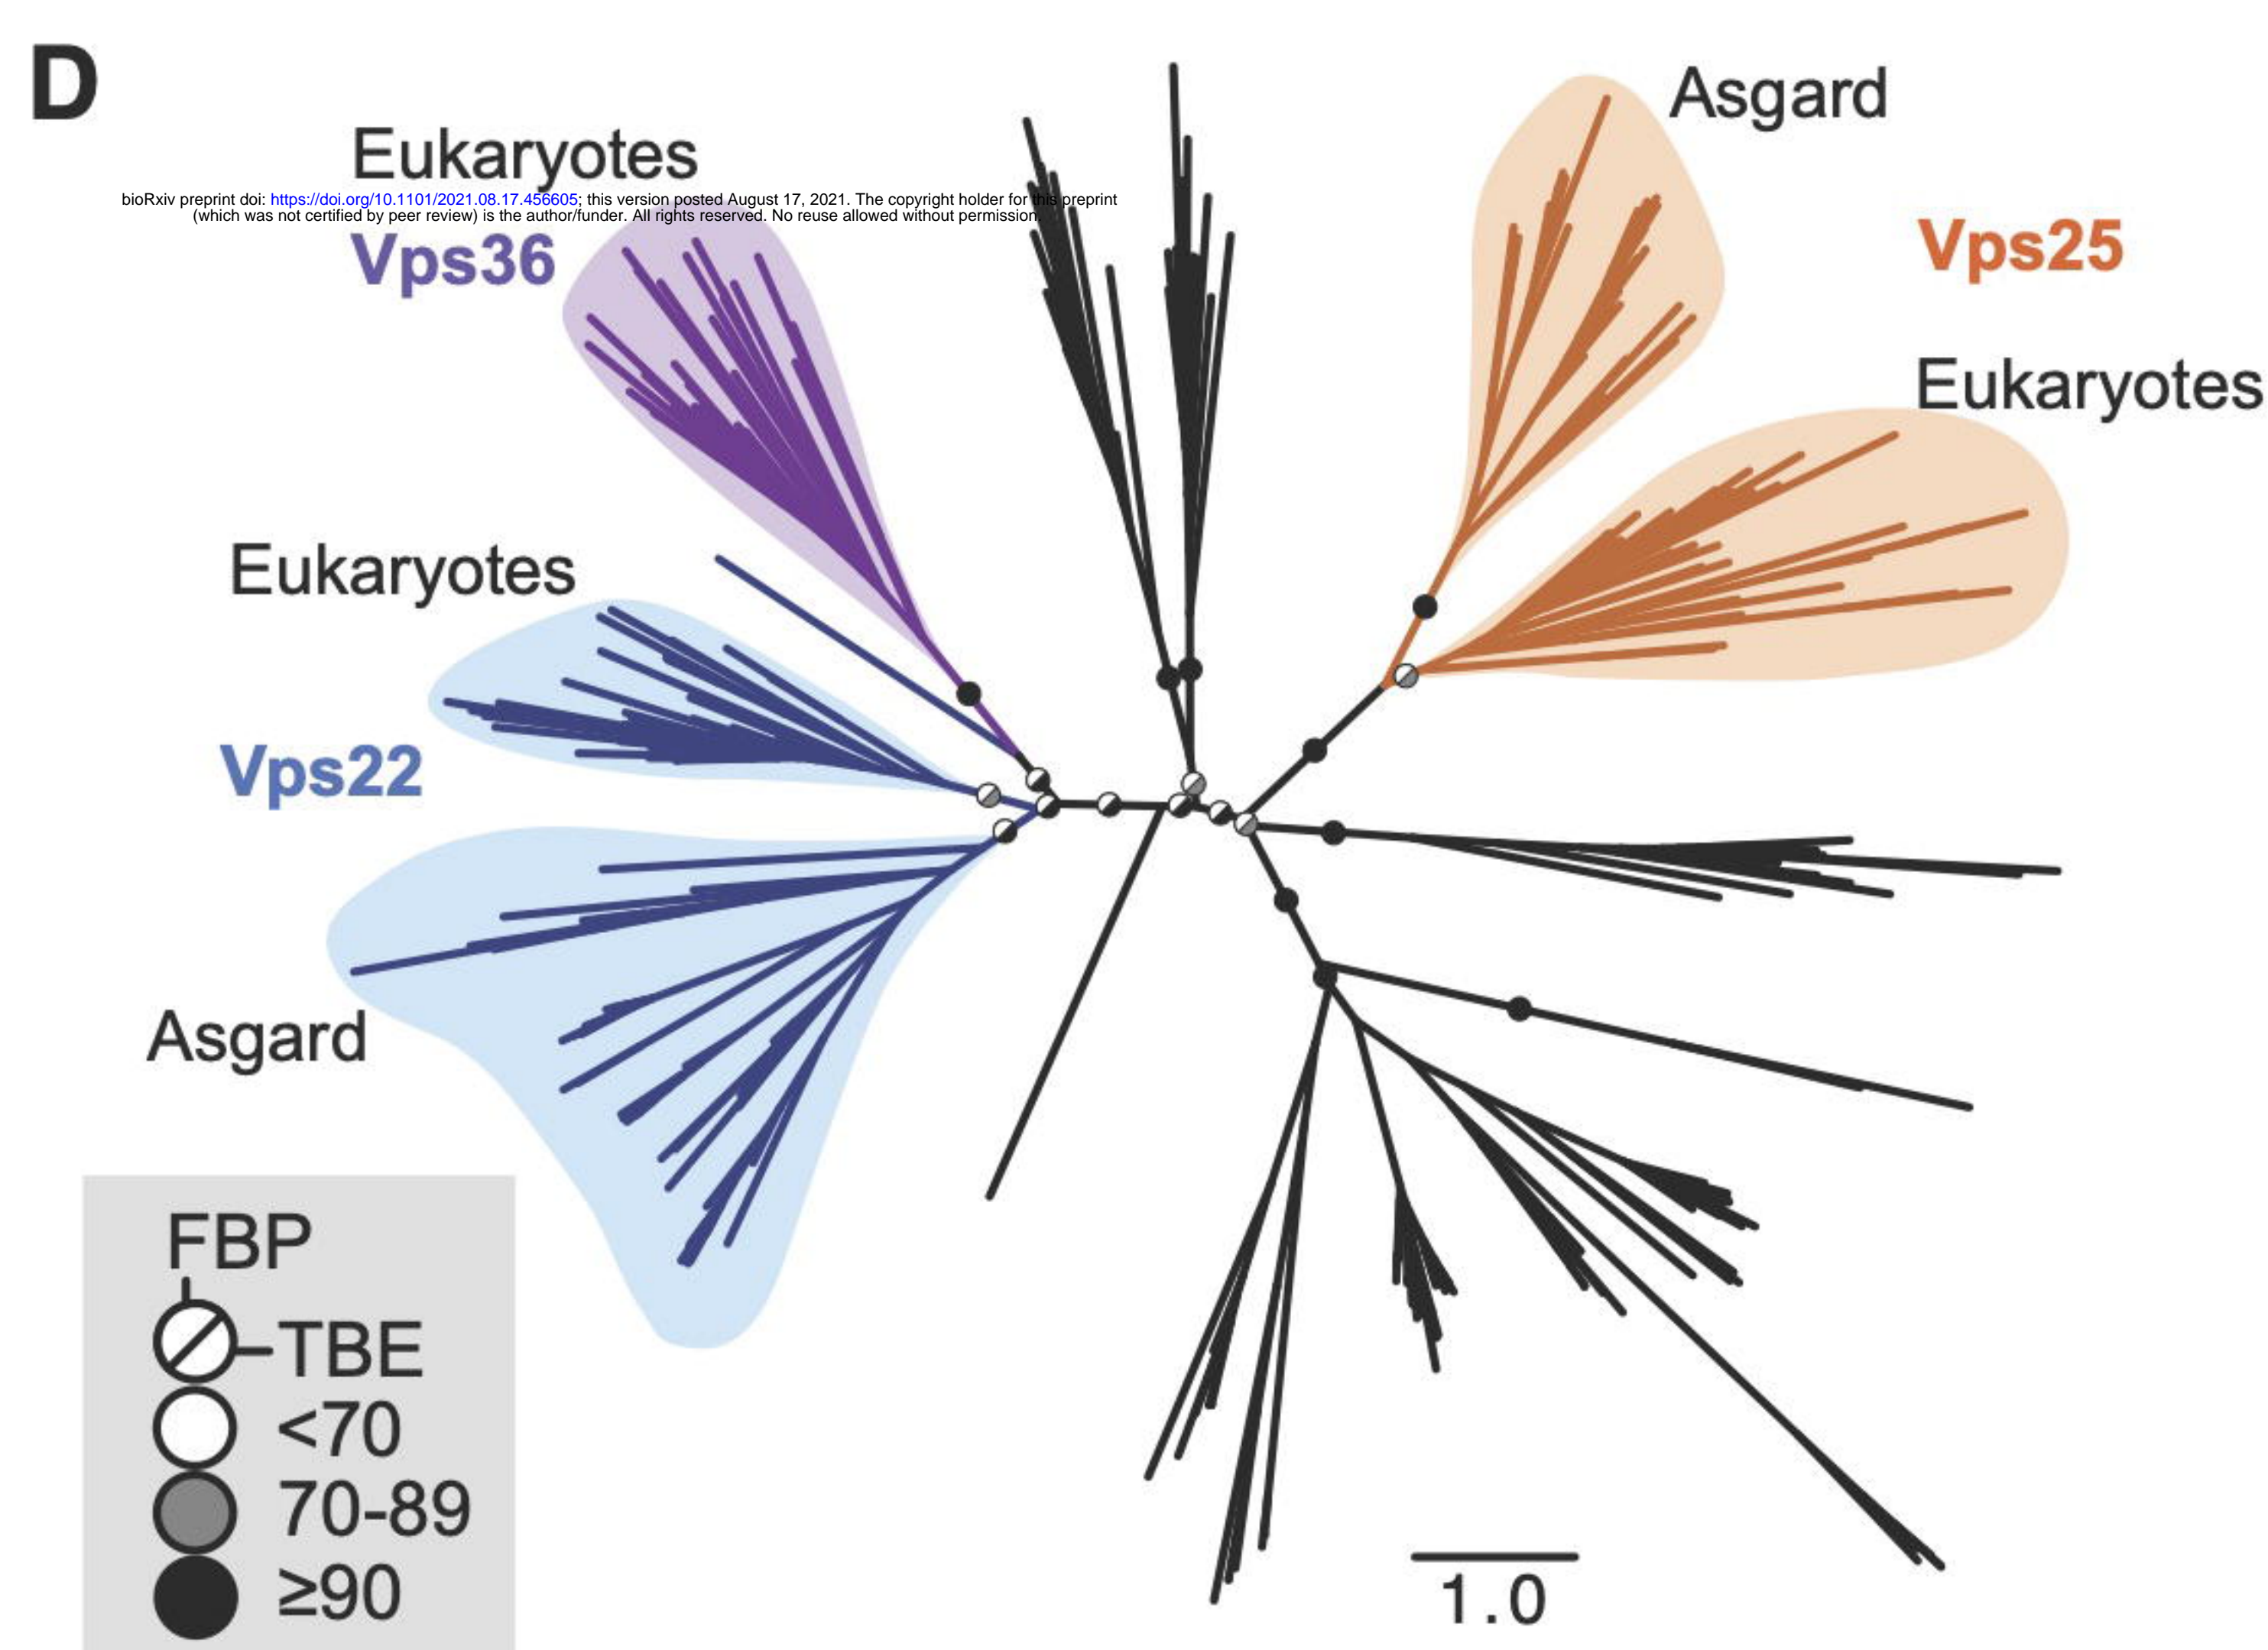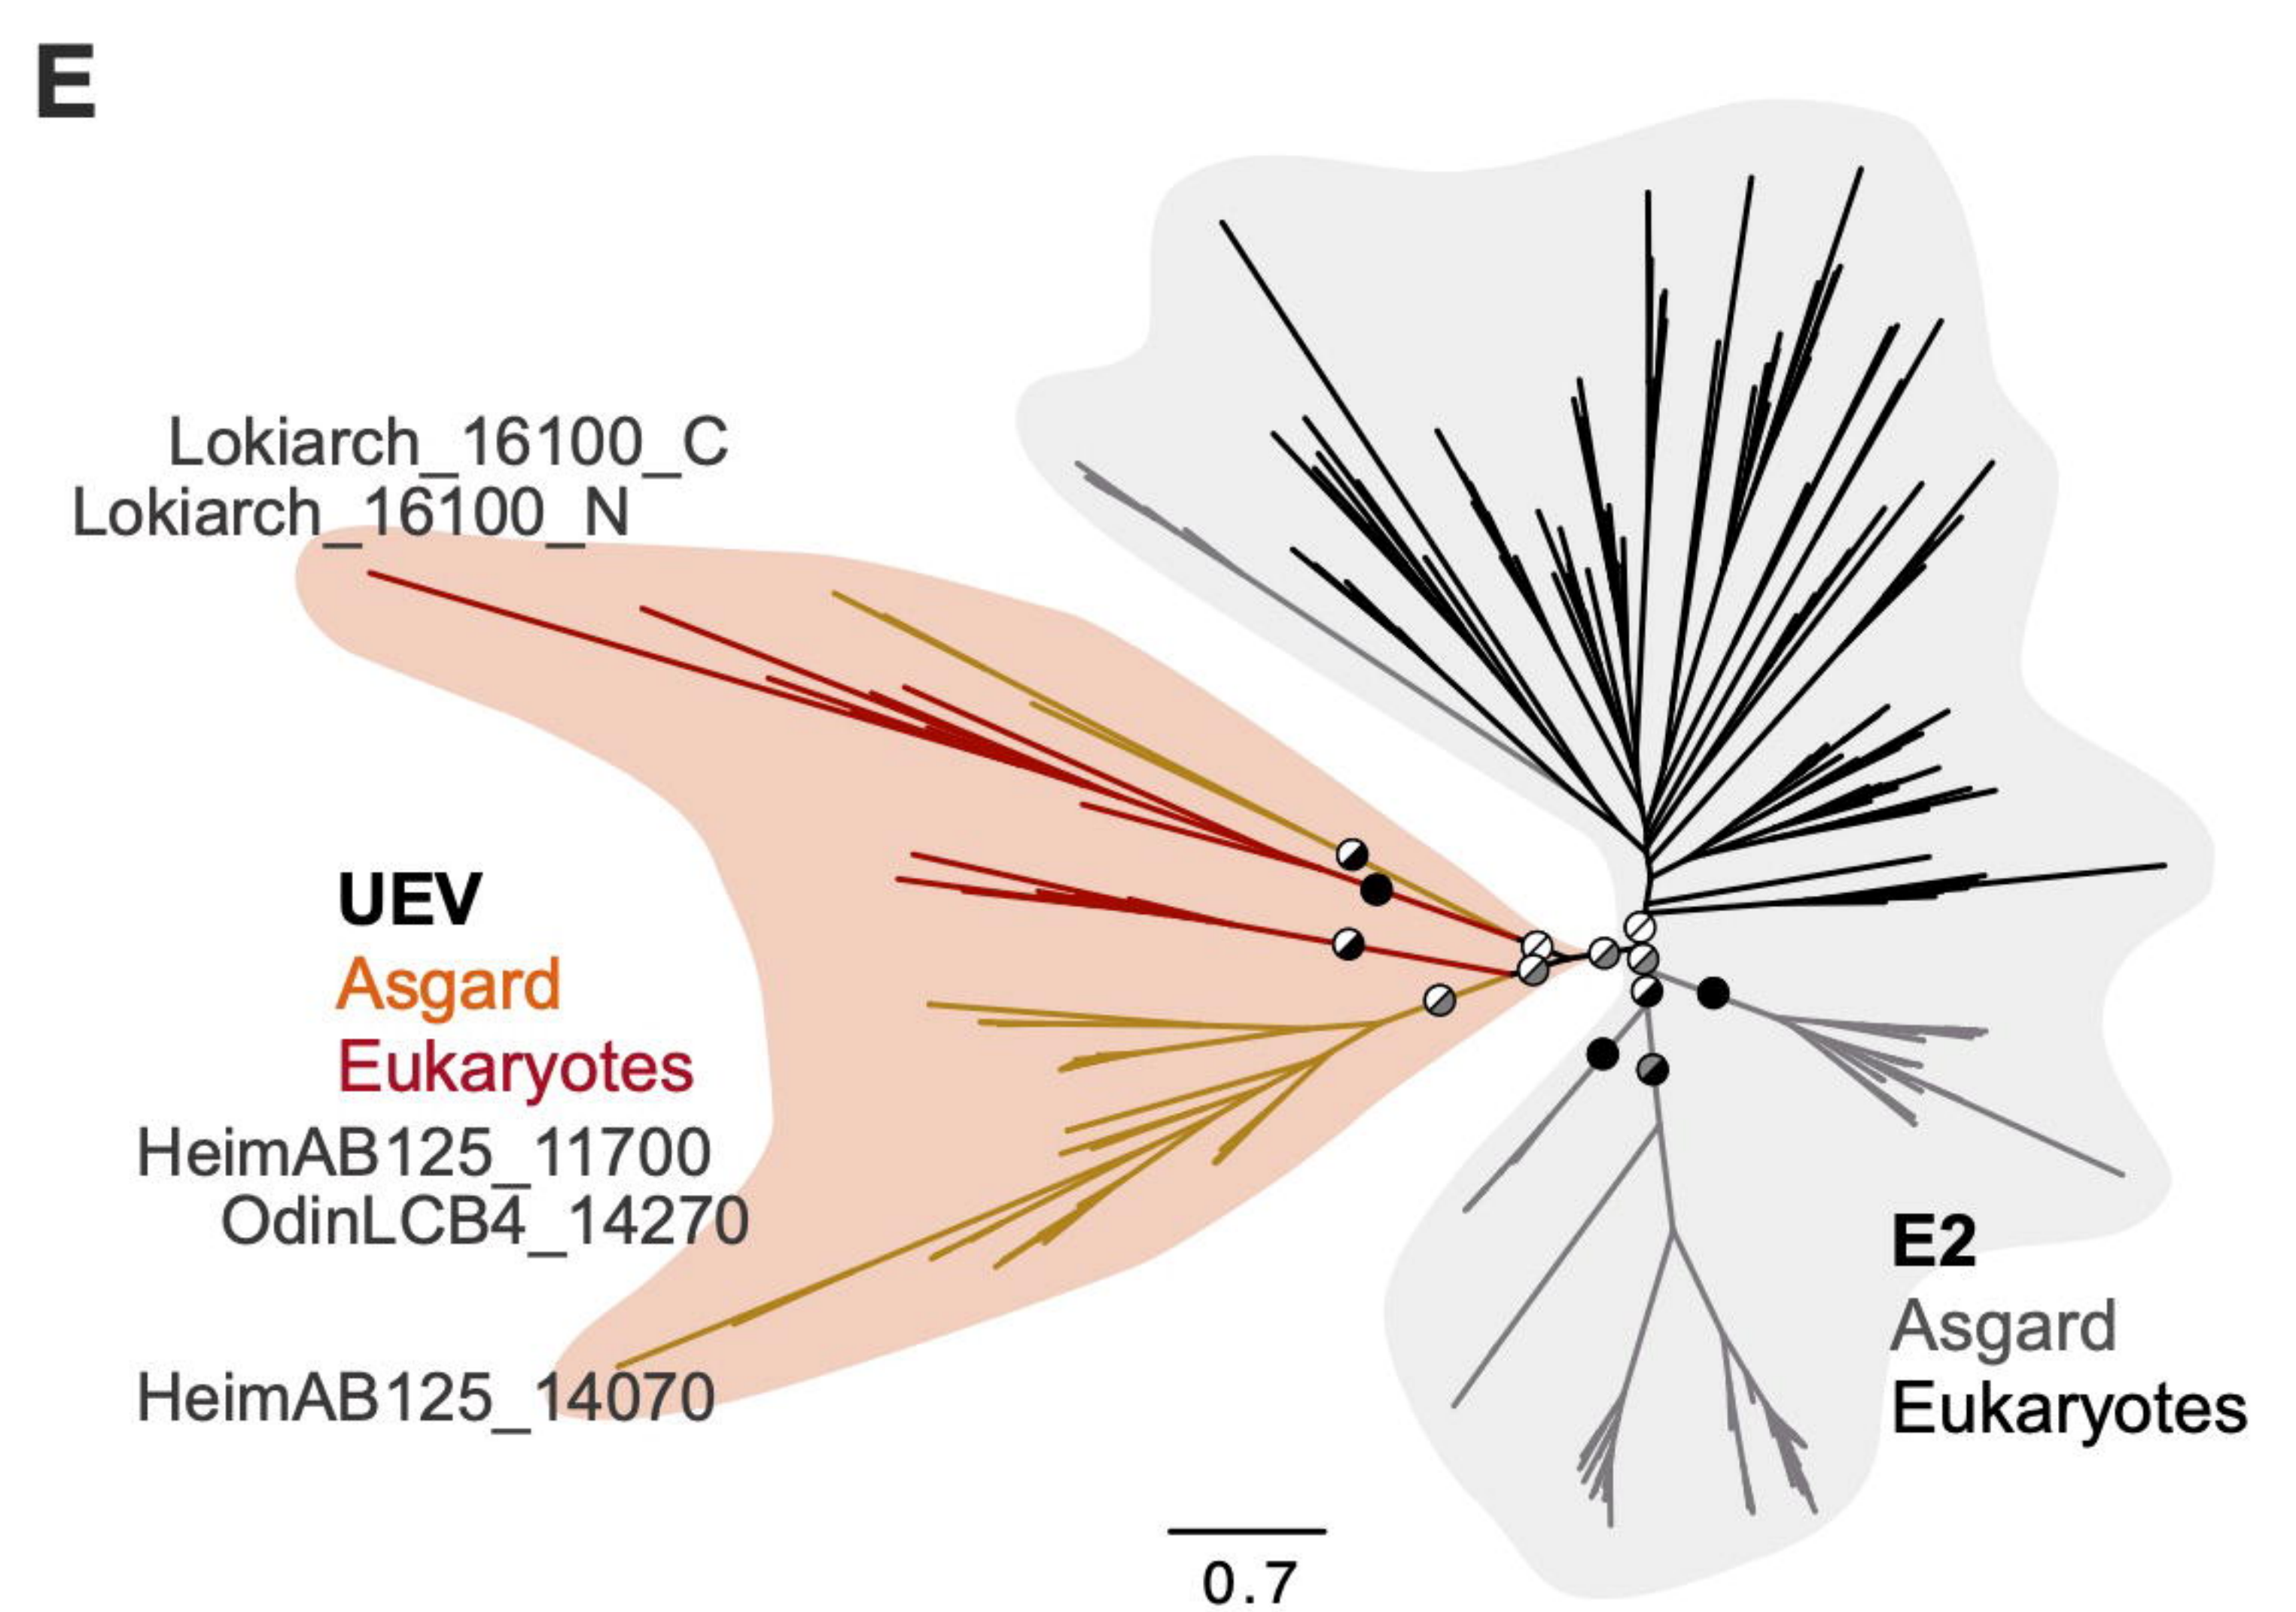

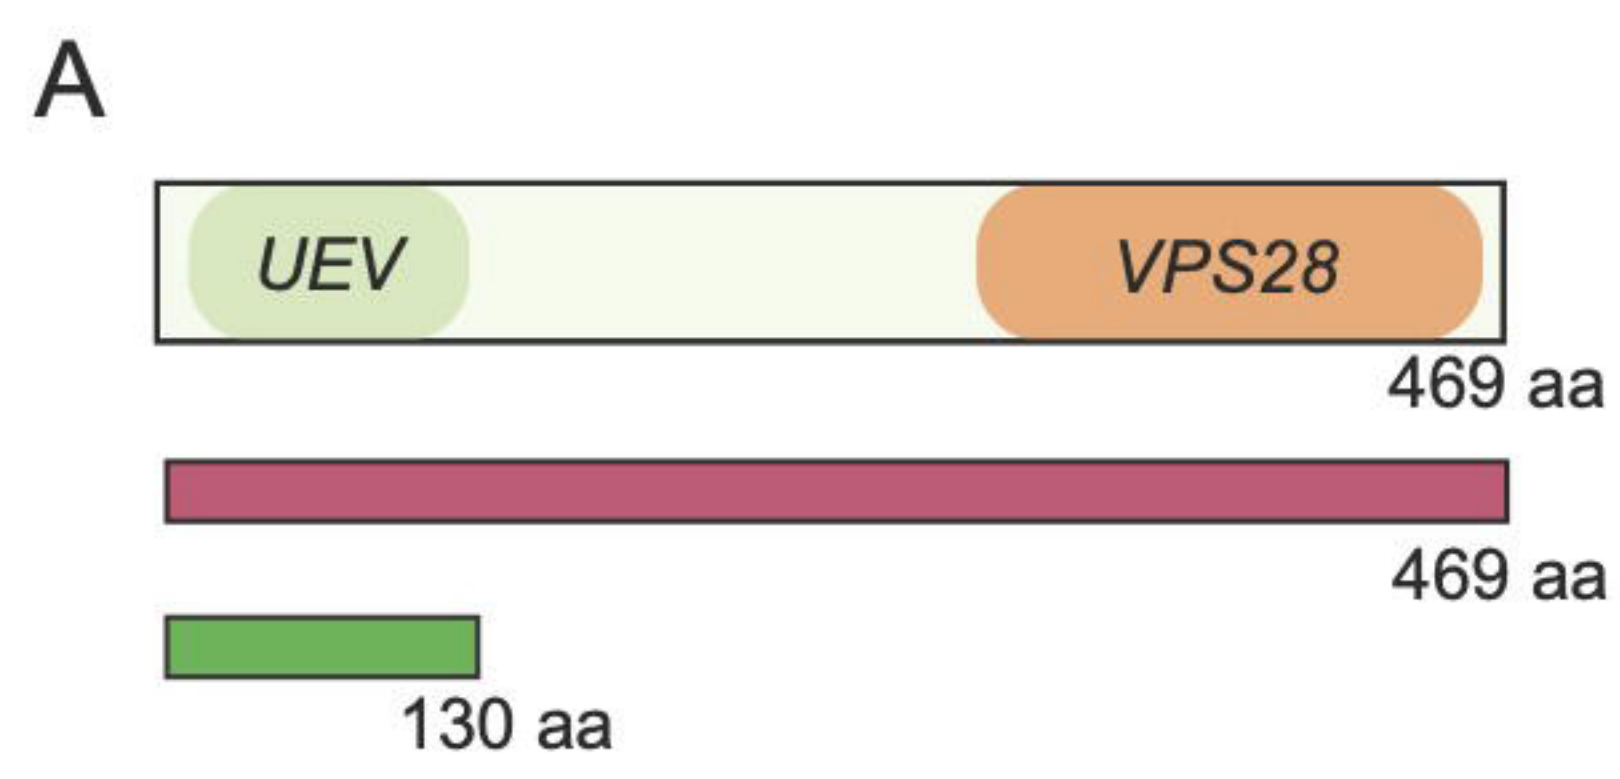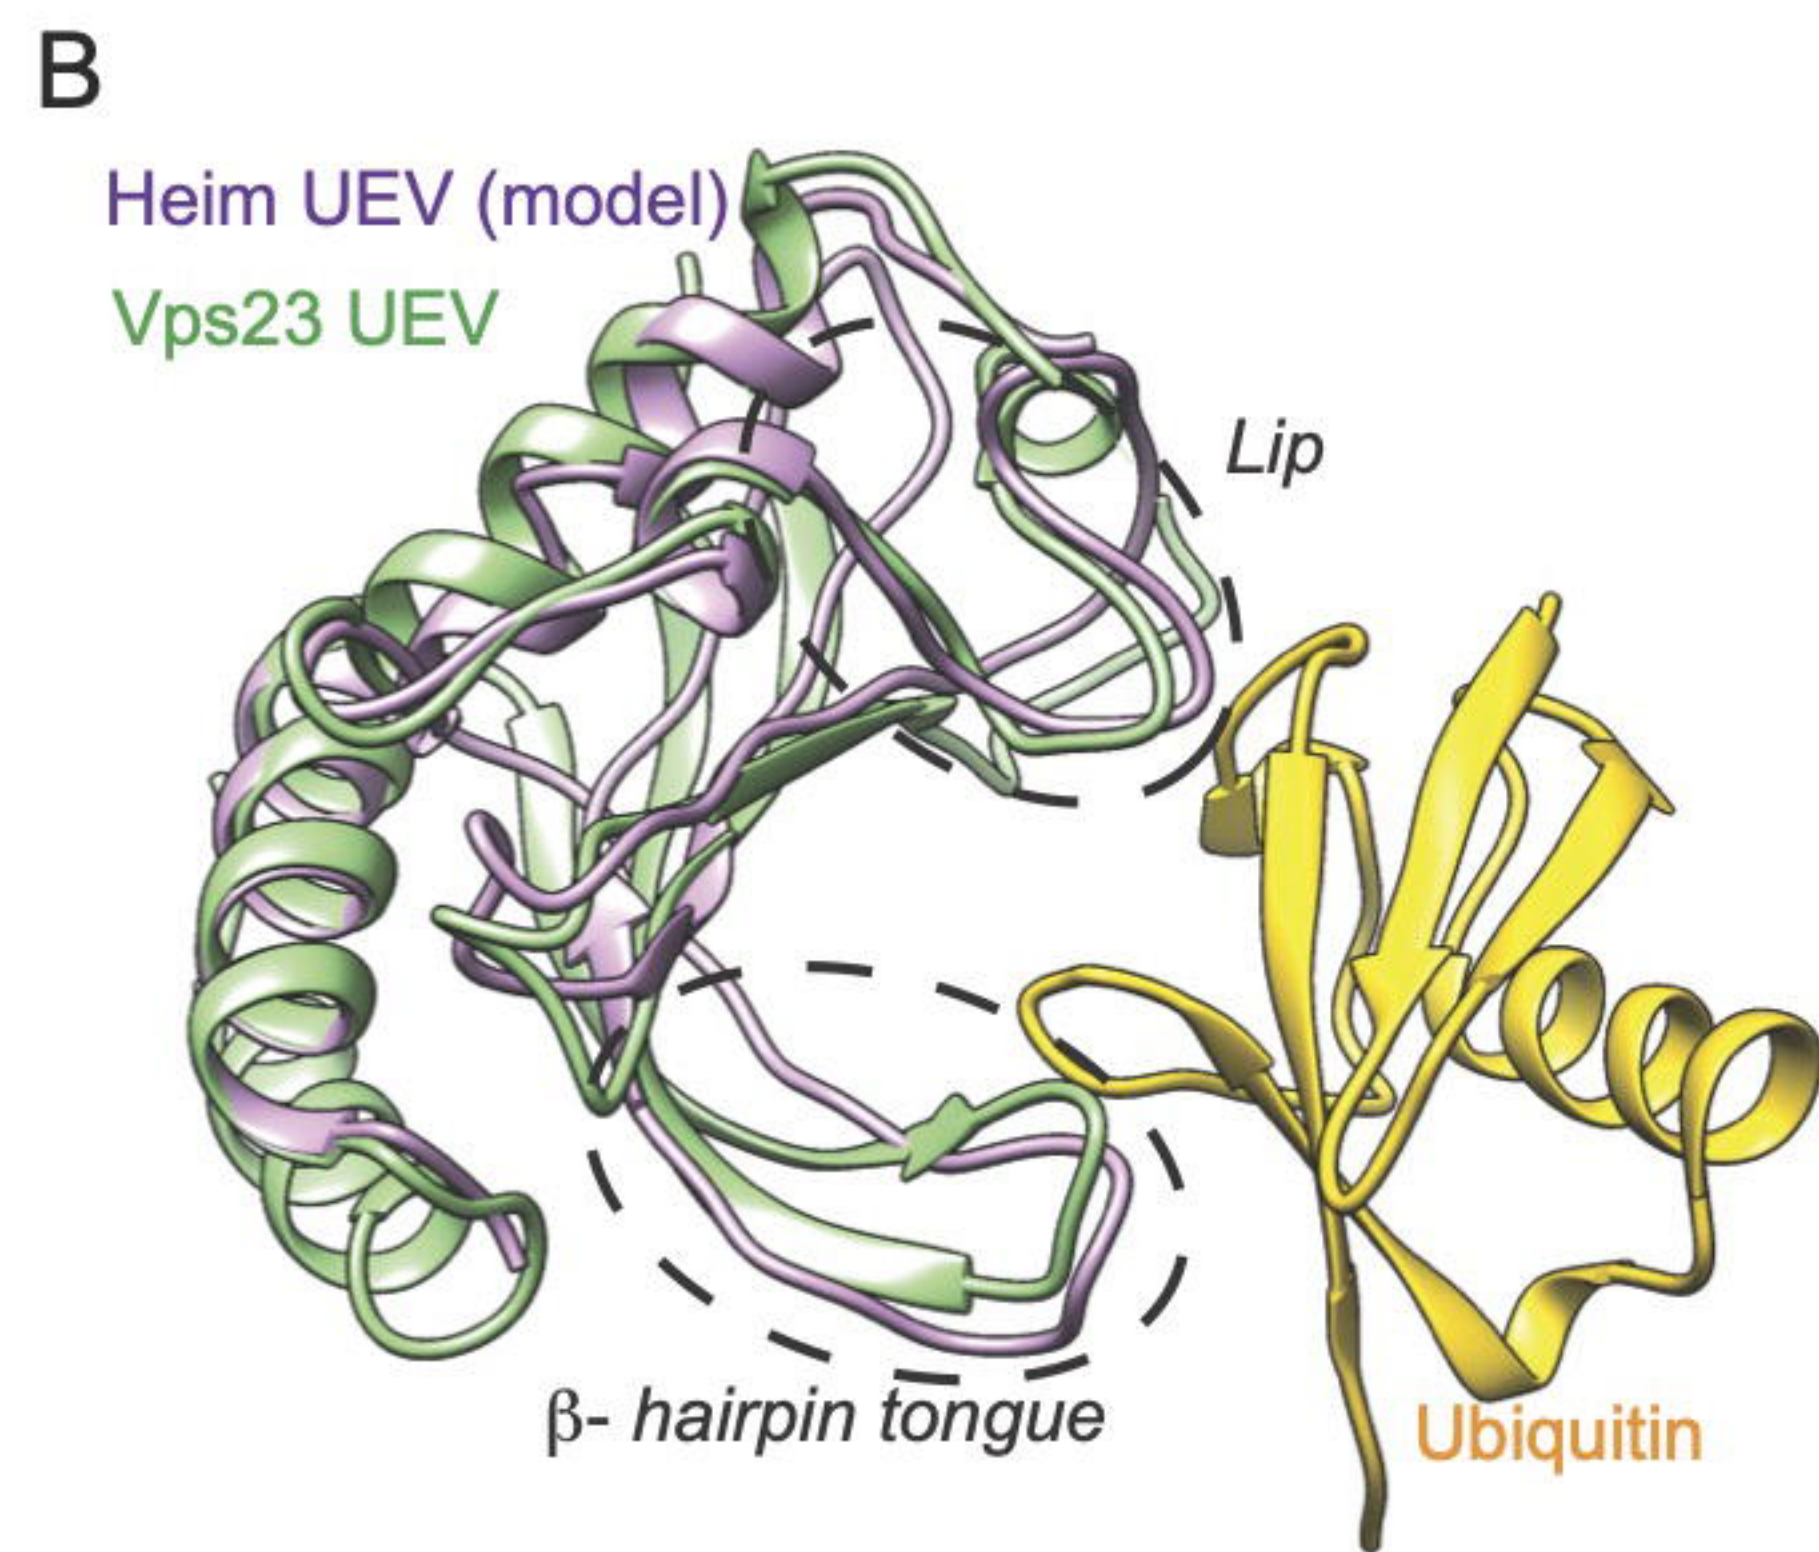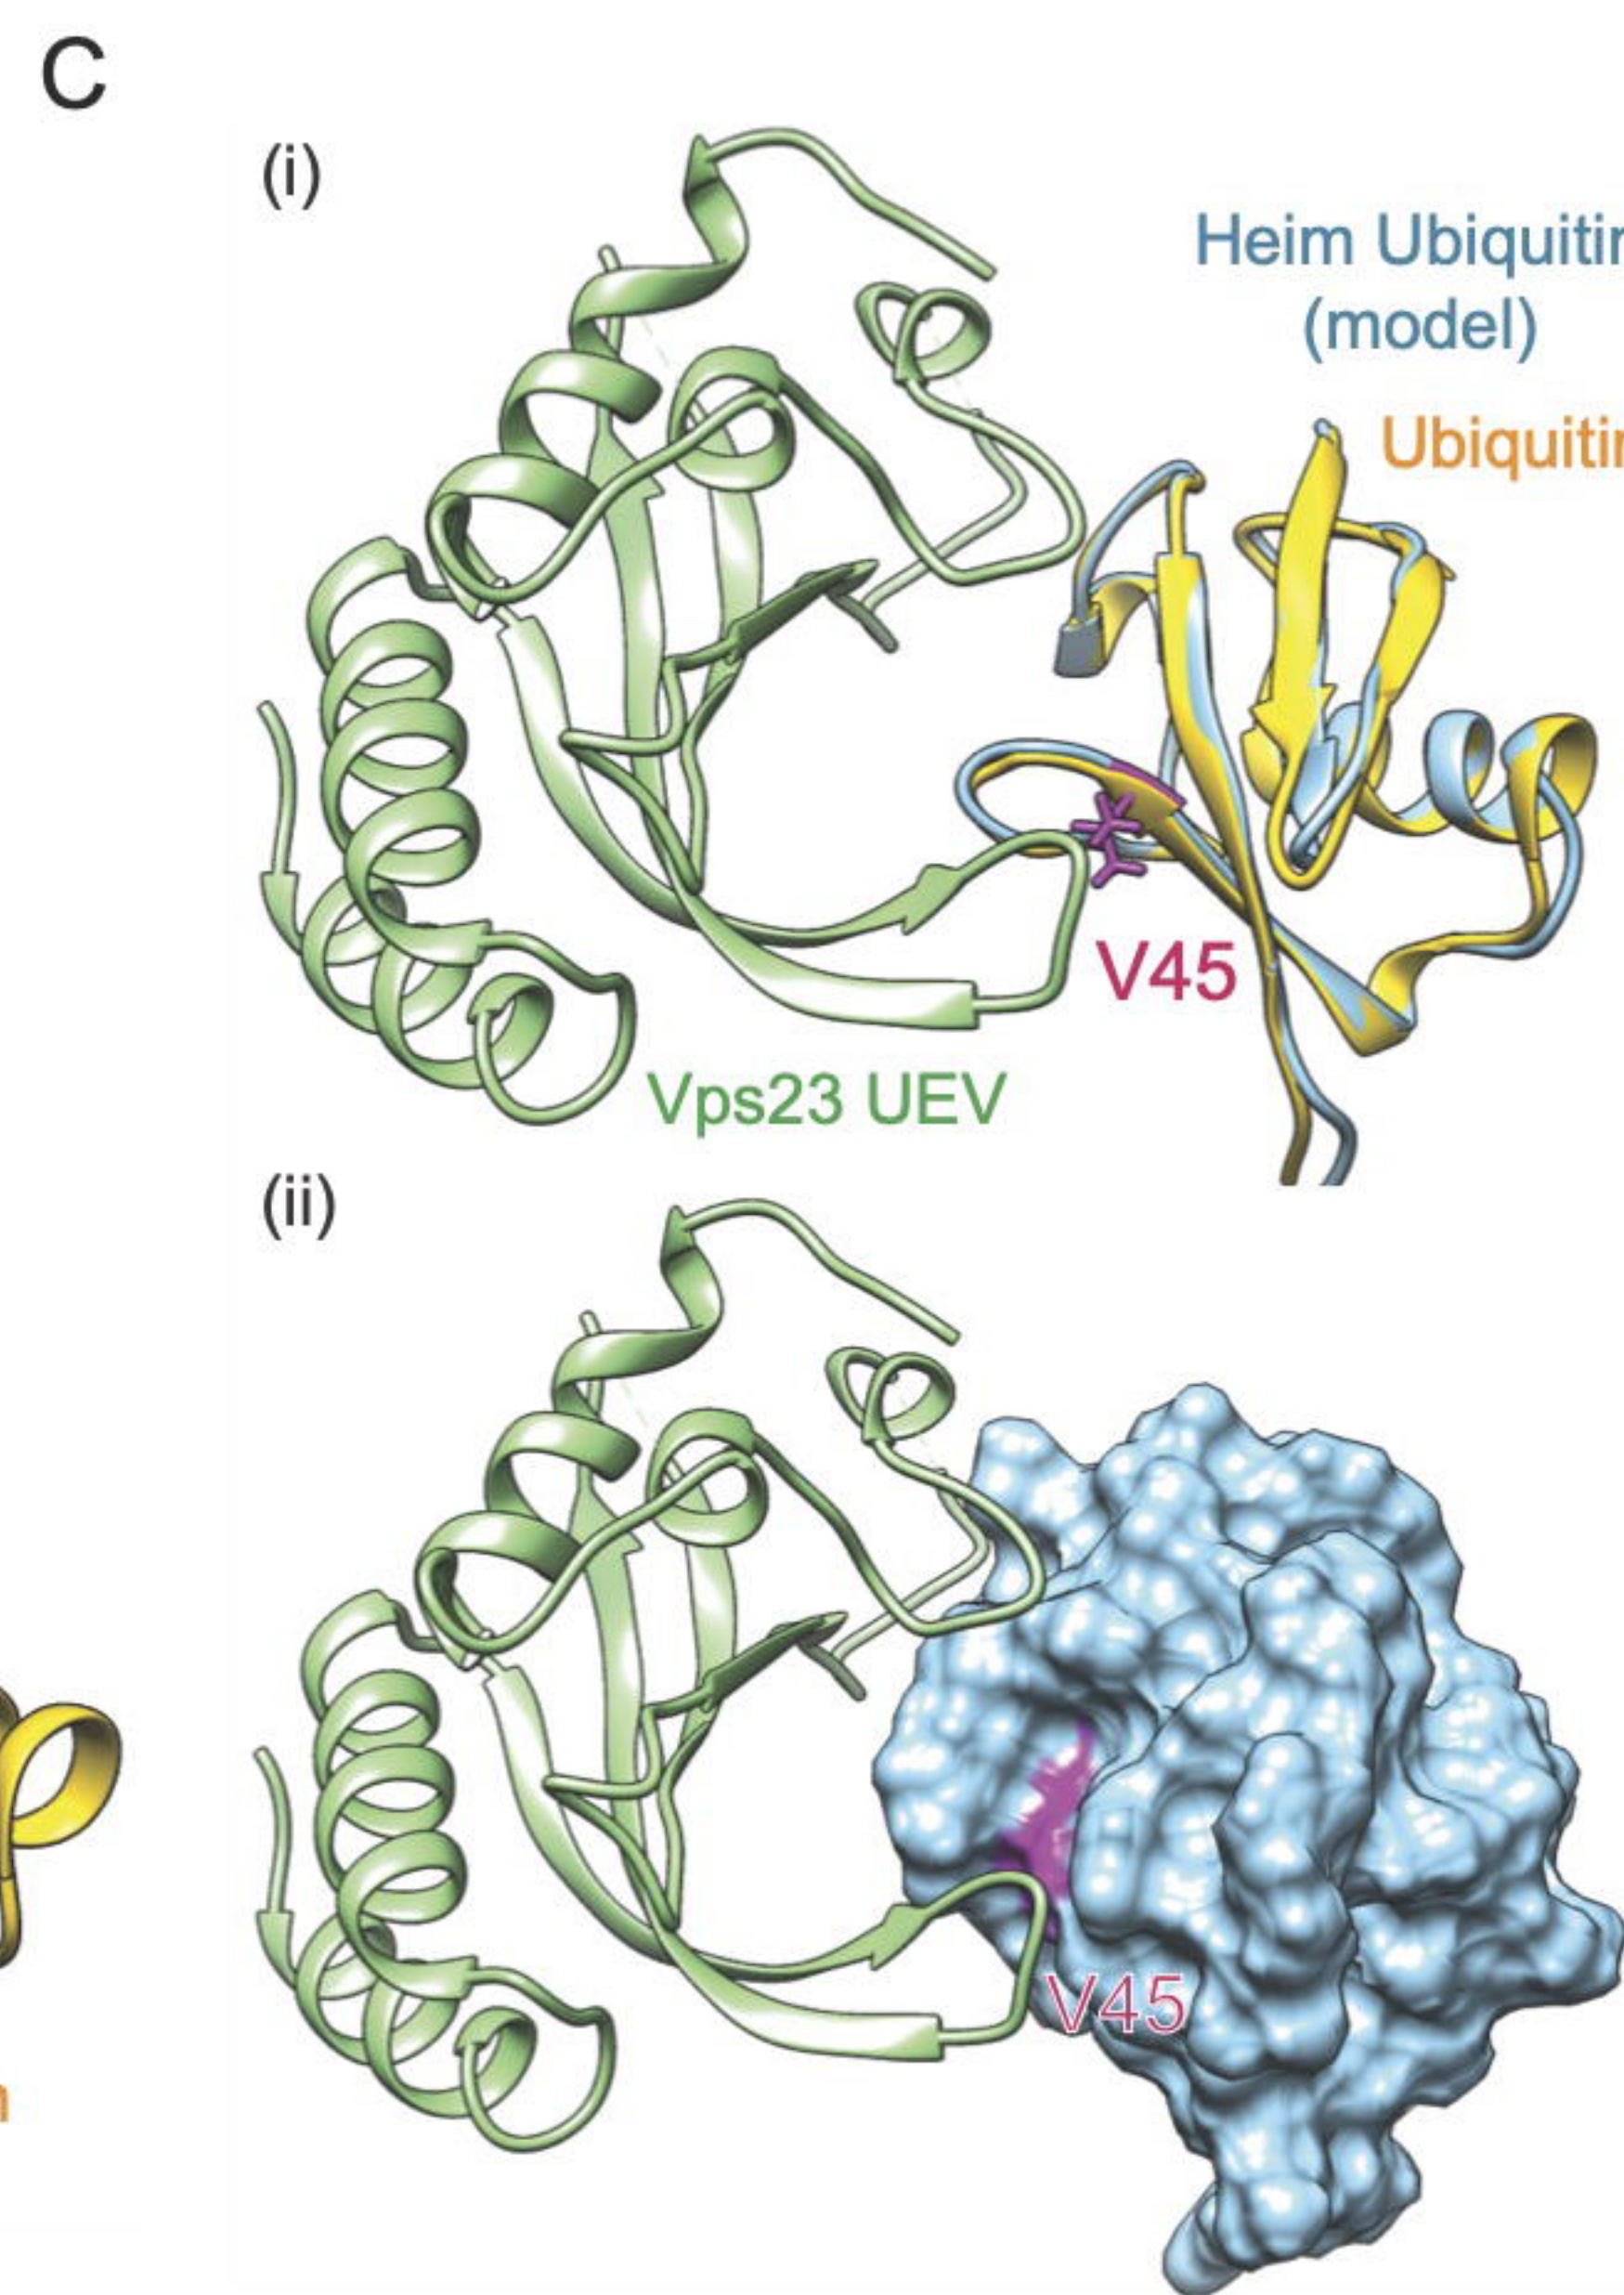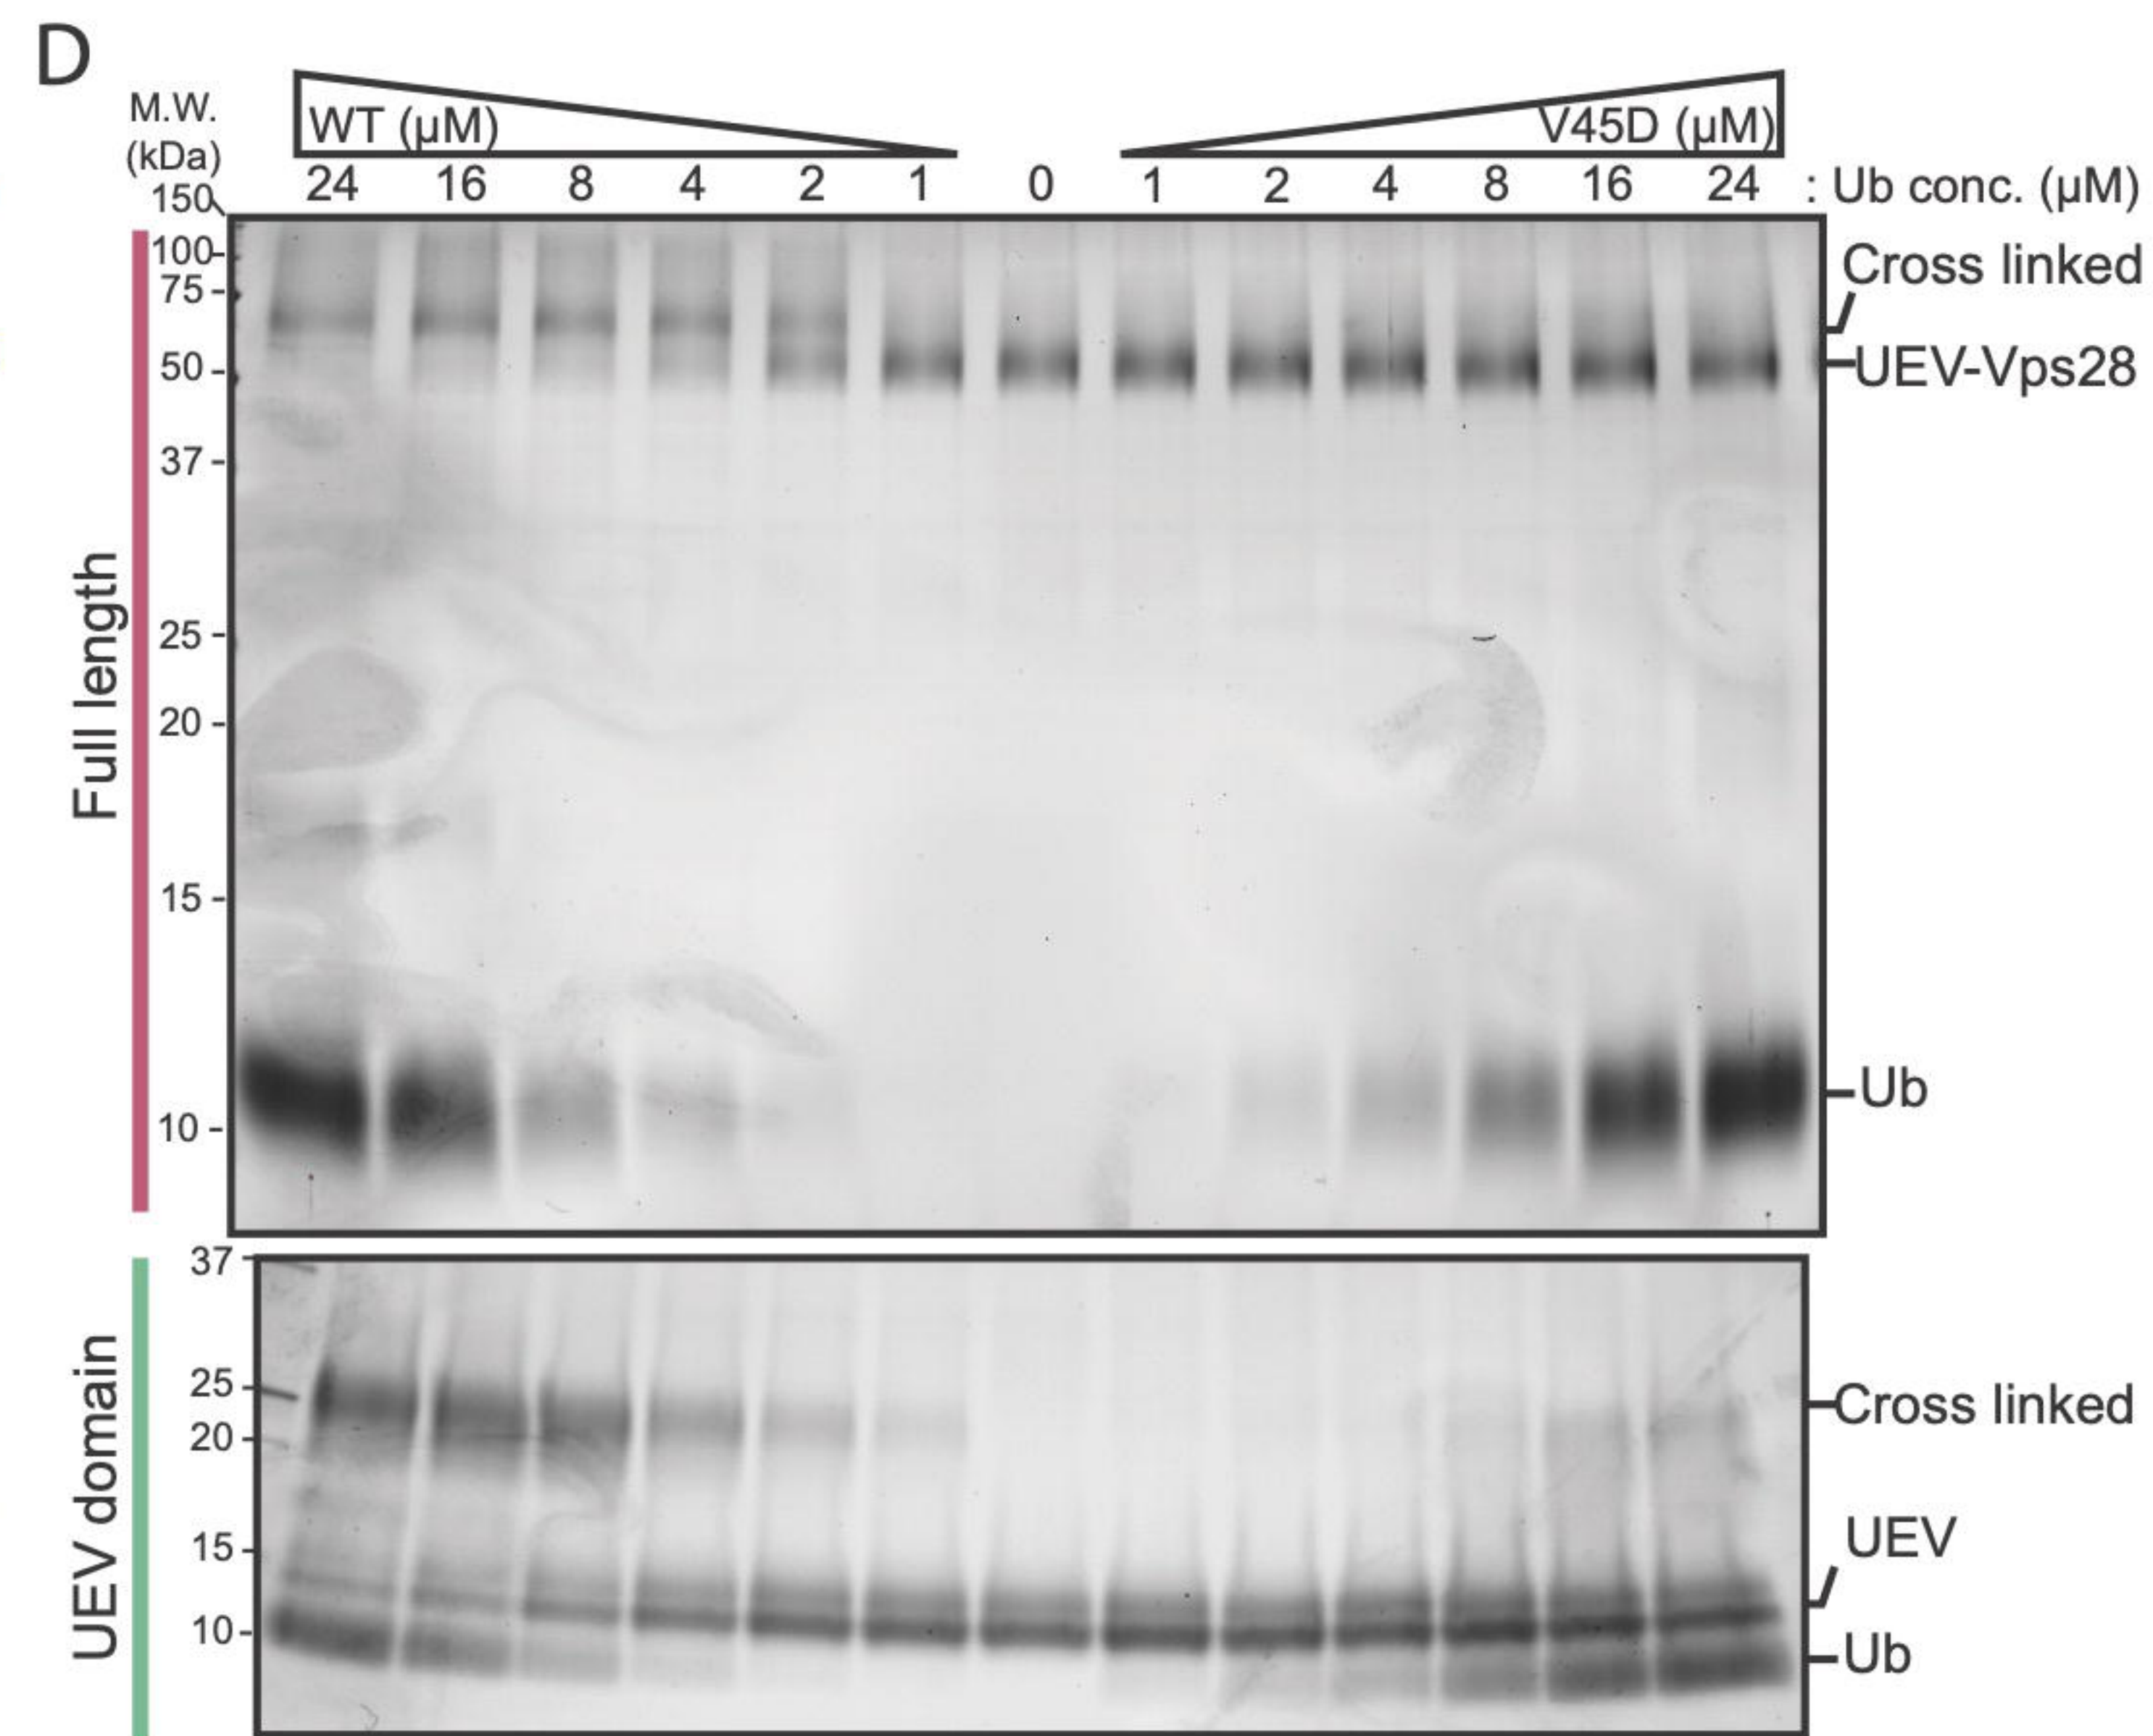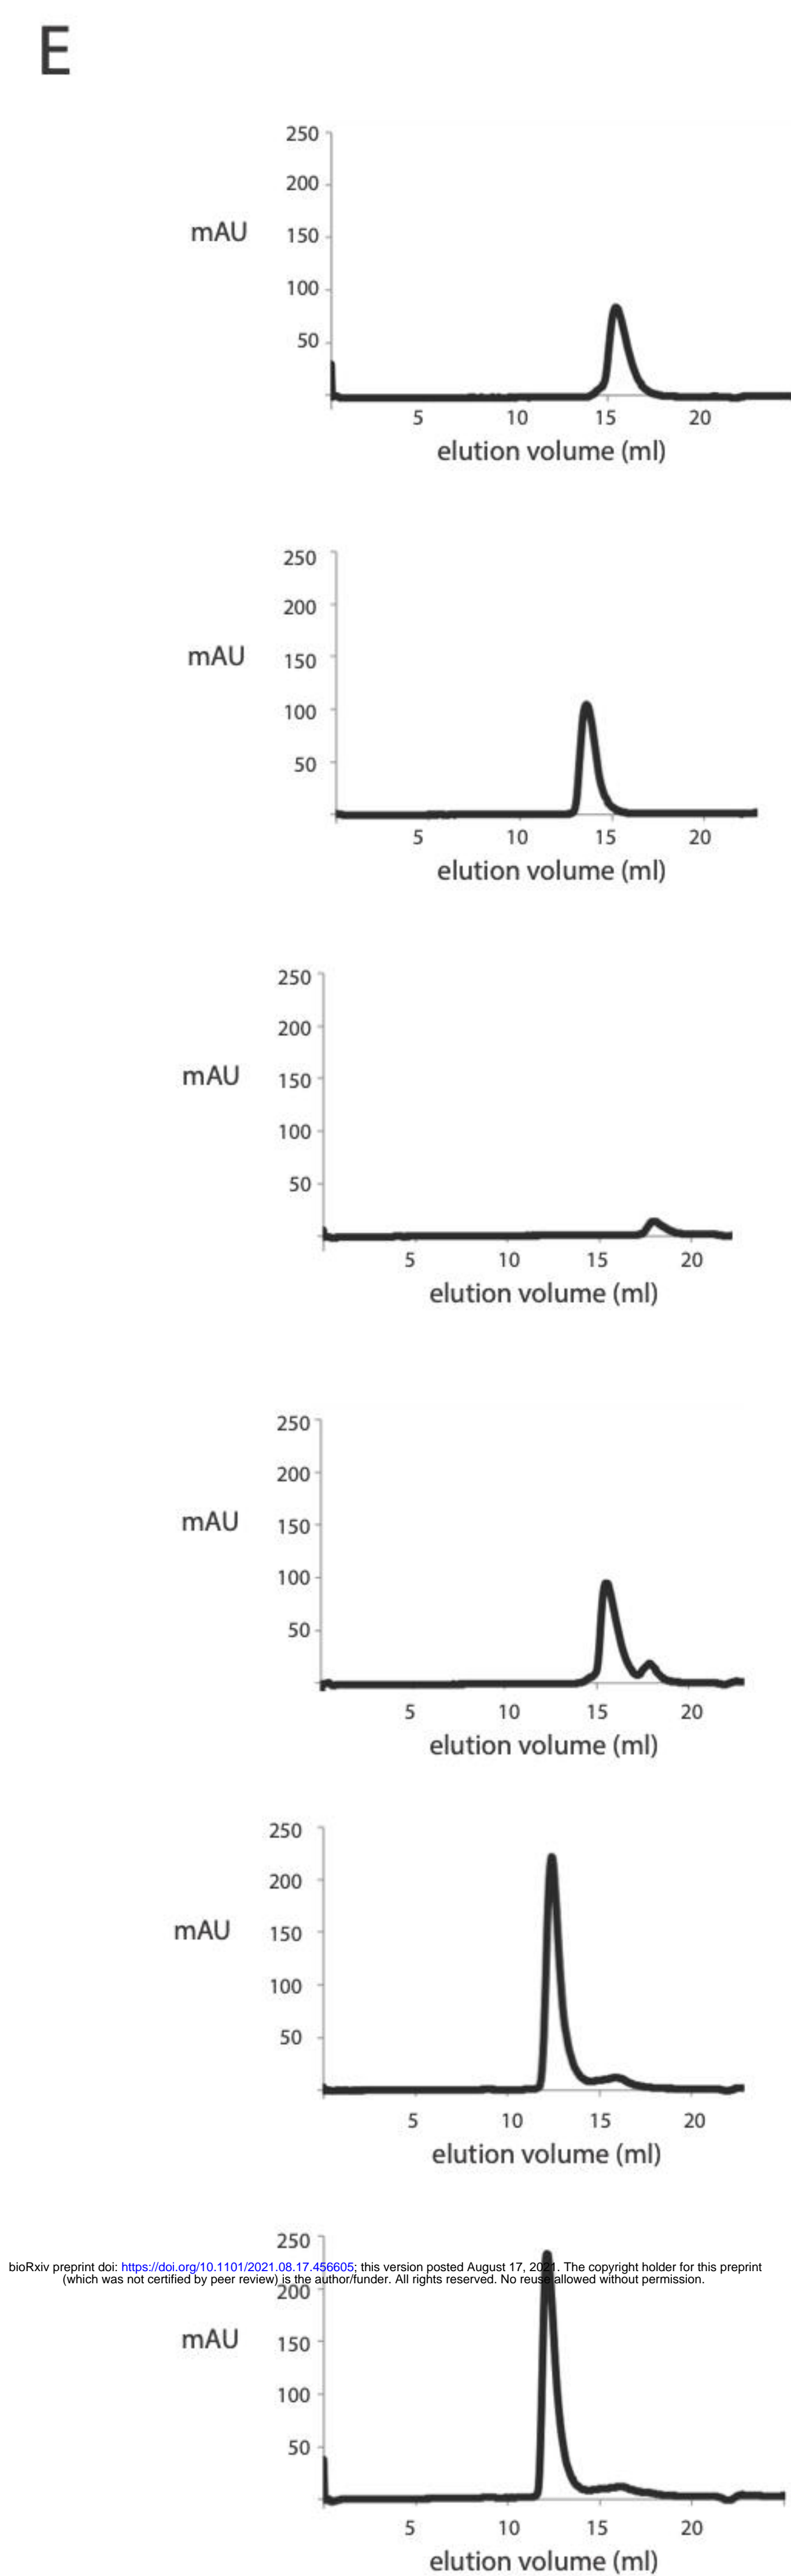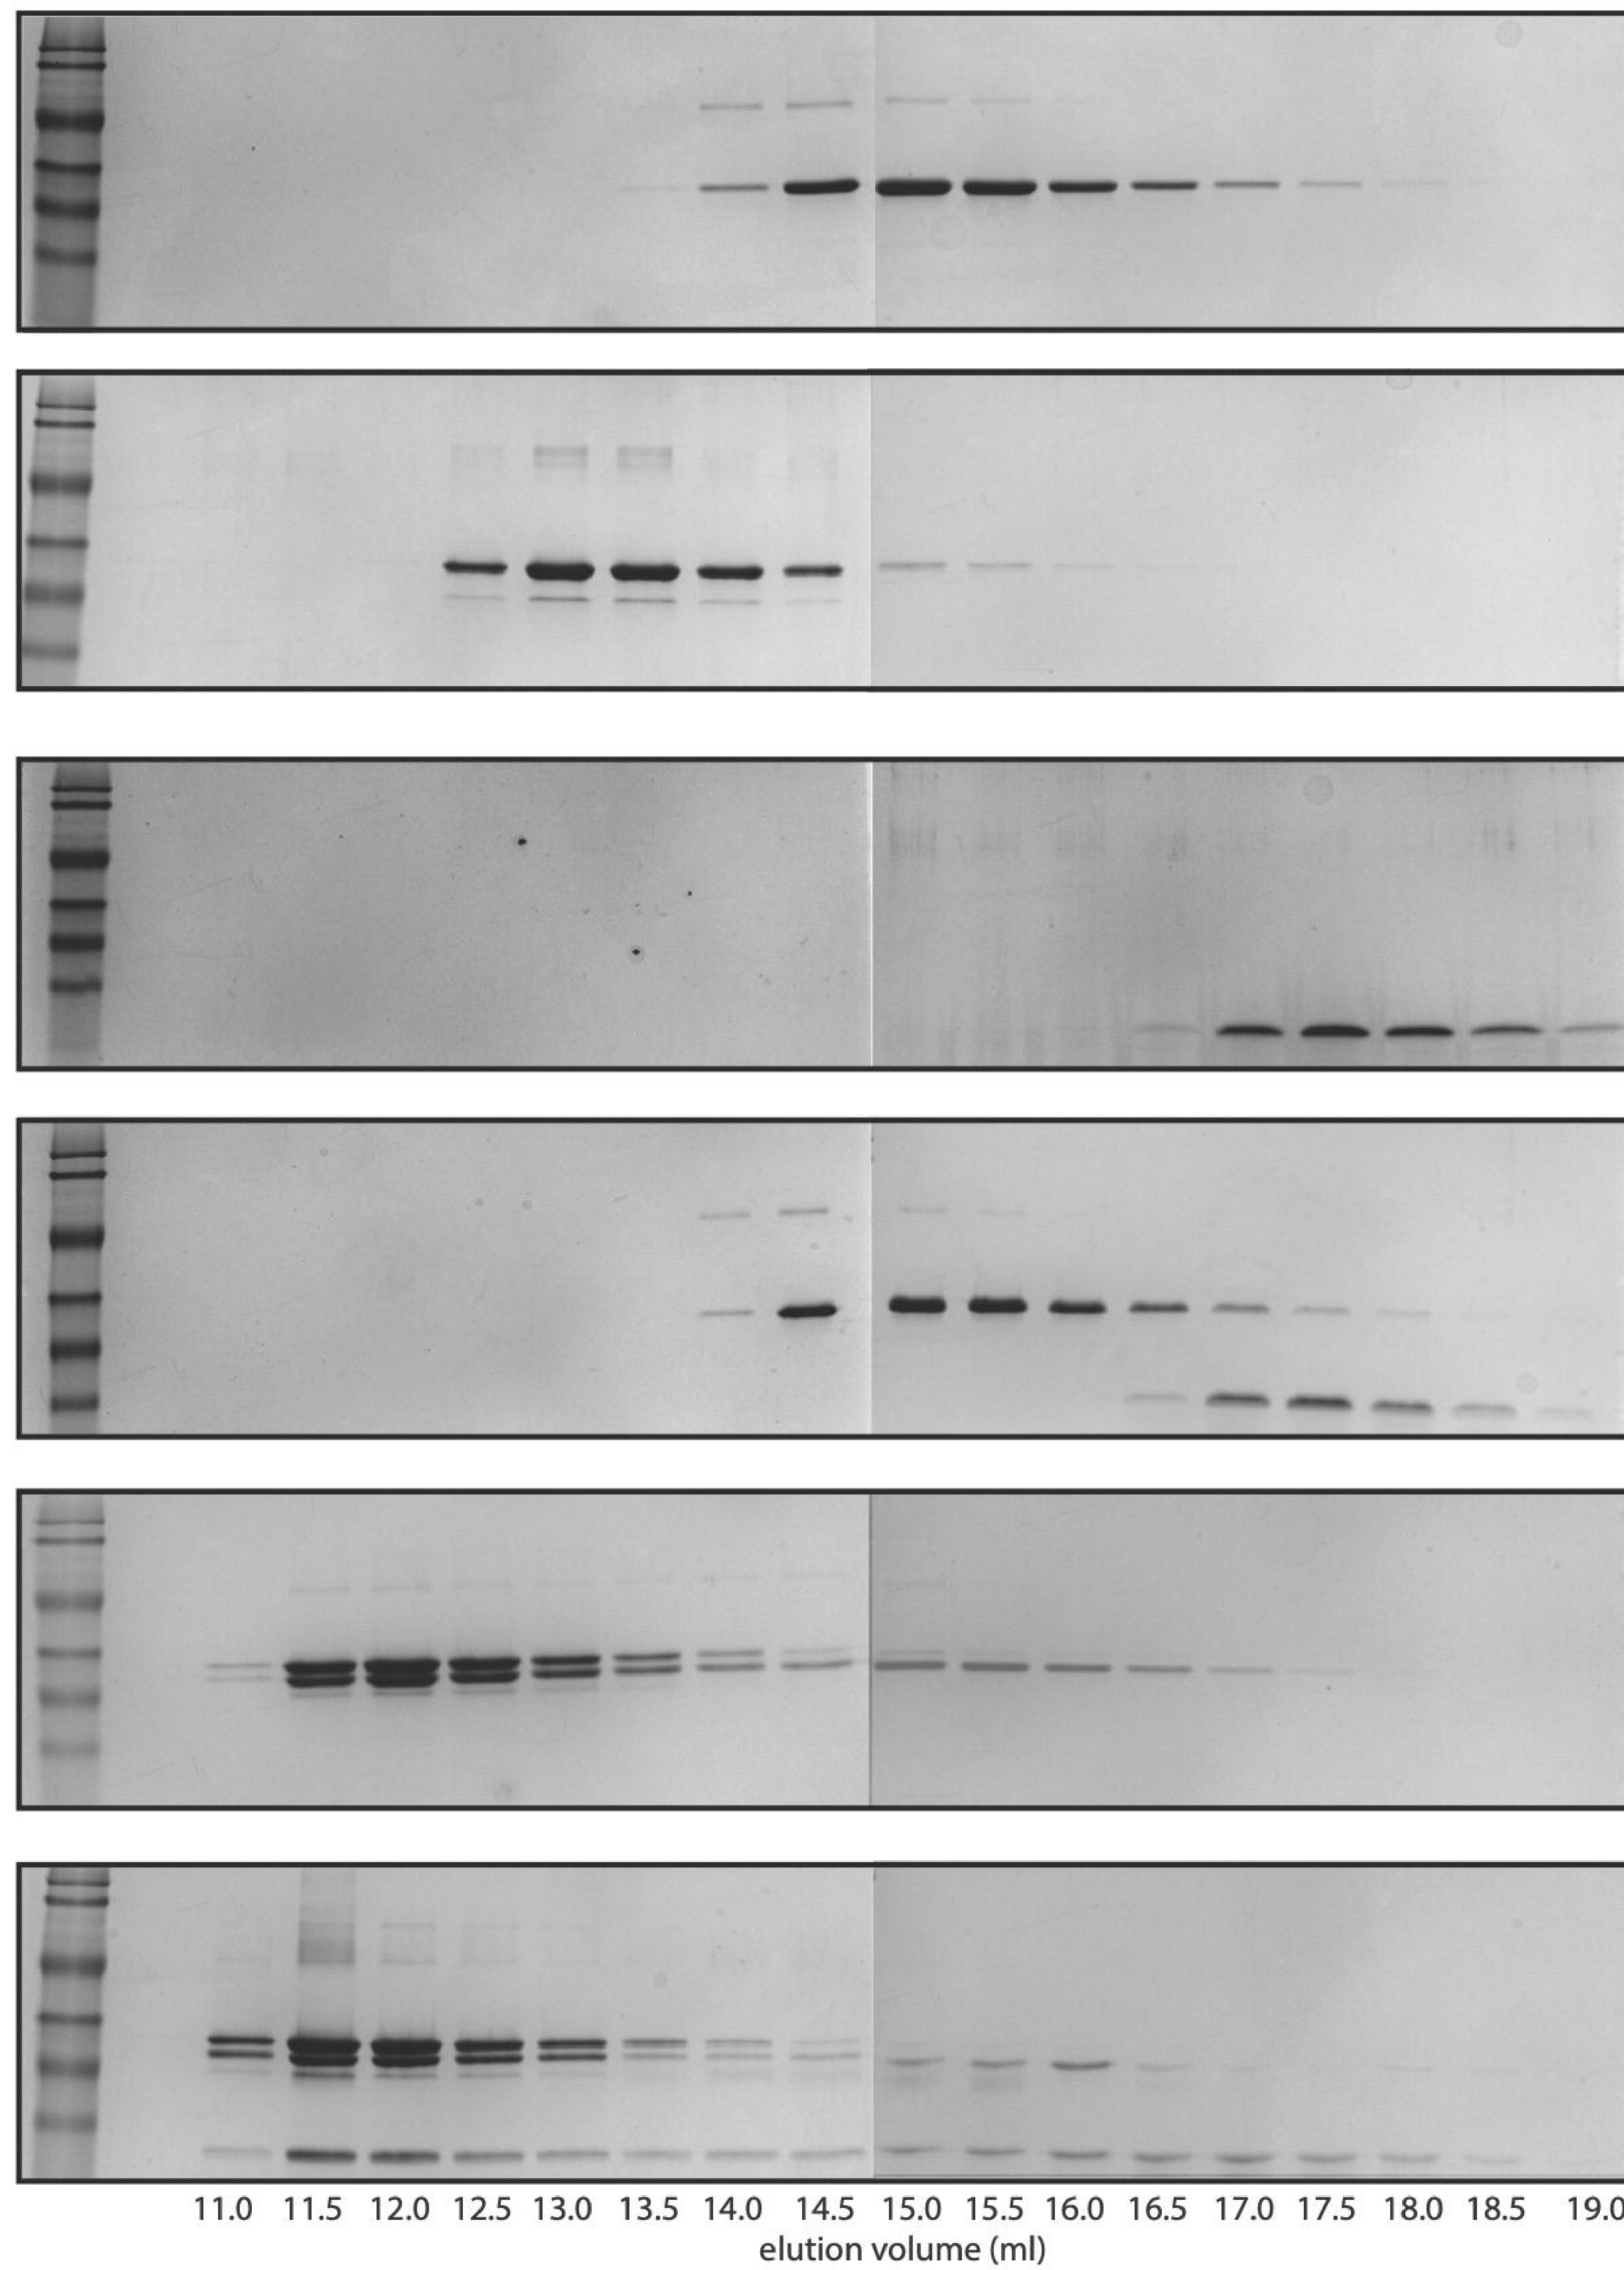

Odinarchaeota  
ESCRT-I proteins

Vps28 only

Vps23(TSG101) only

ubiquitin only

Vps28  
plus ubiquitin

Vps23(TSG101)/Vps28  
complex

ubiquitinVps23(TSG101)  
/Vps28 complex

↑  
12.4 ml  
 $\beta$ -amylase  
(200 kDa)

↑  
13.6 ml  
Alcohol  
dehydrogenase  
(150 kDa)

↑  
14.6 ml  
BSA  
(66 kDa)

↑  
17.4 ml  
Carbonic  
anhydrase  
(29 kDa)

↑  
18.9 ml  
Cytochrome c  
(12.4 kDa)



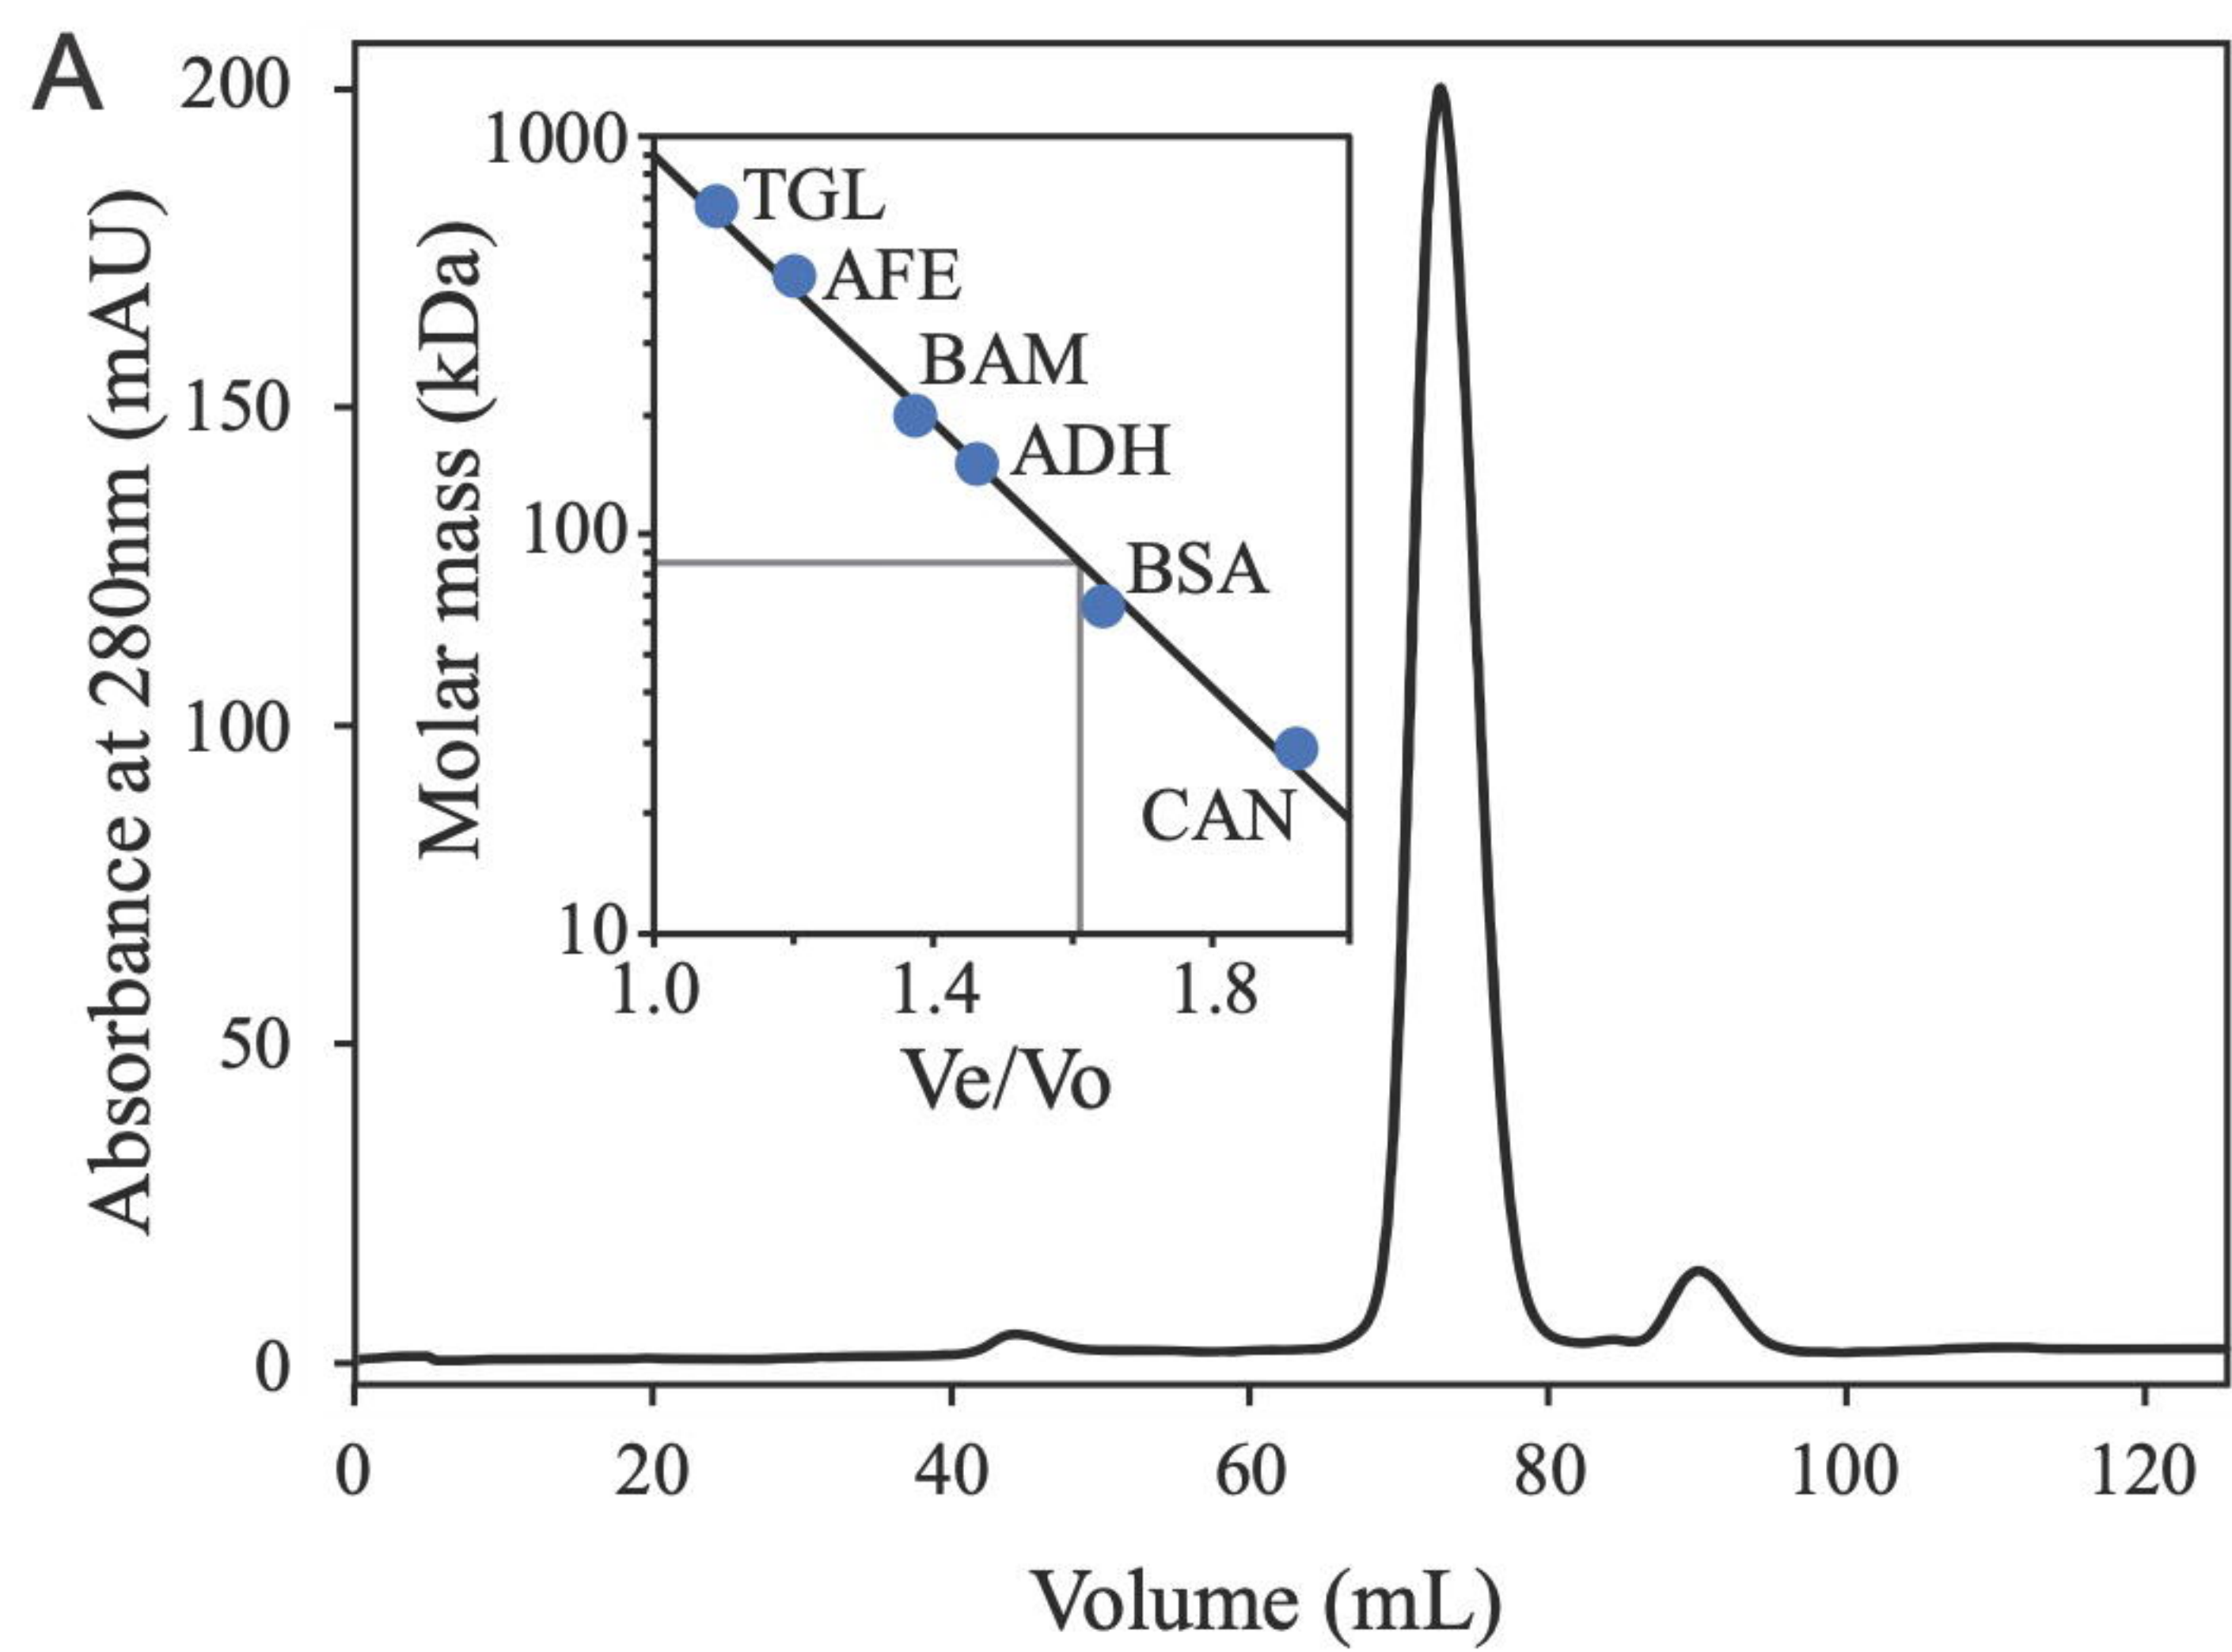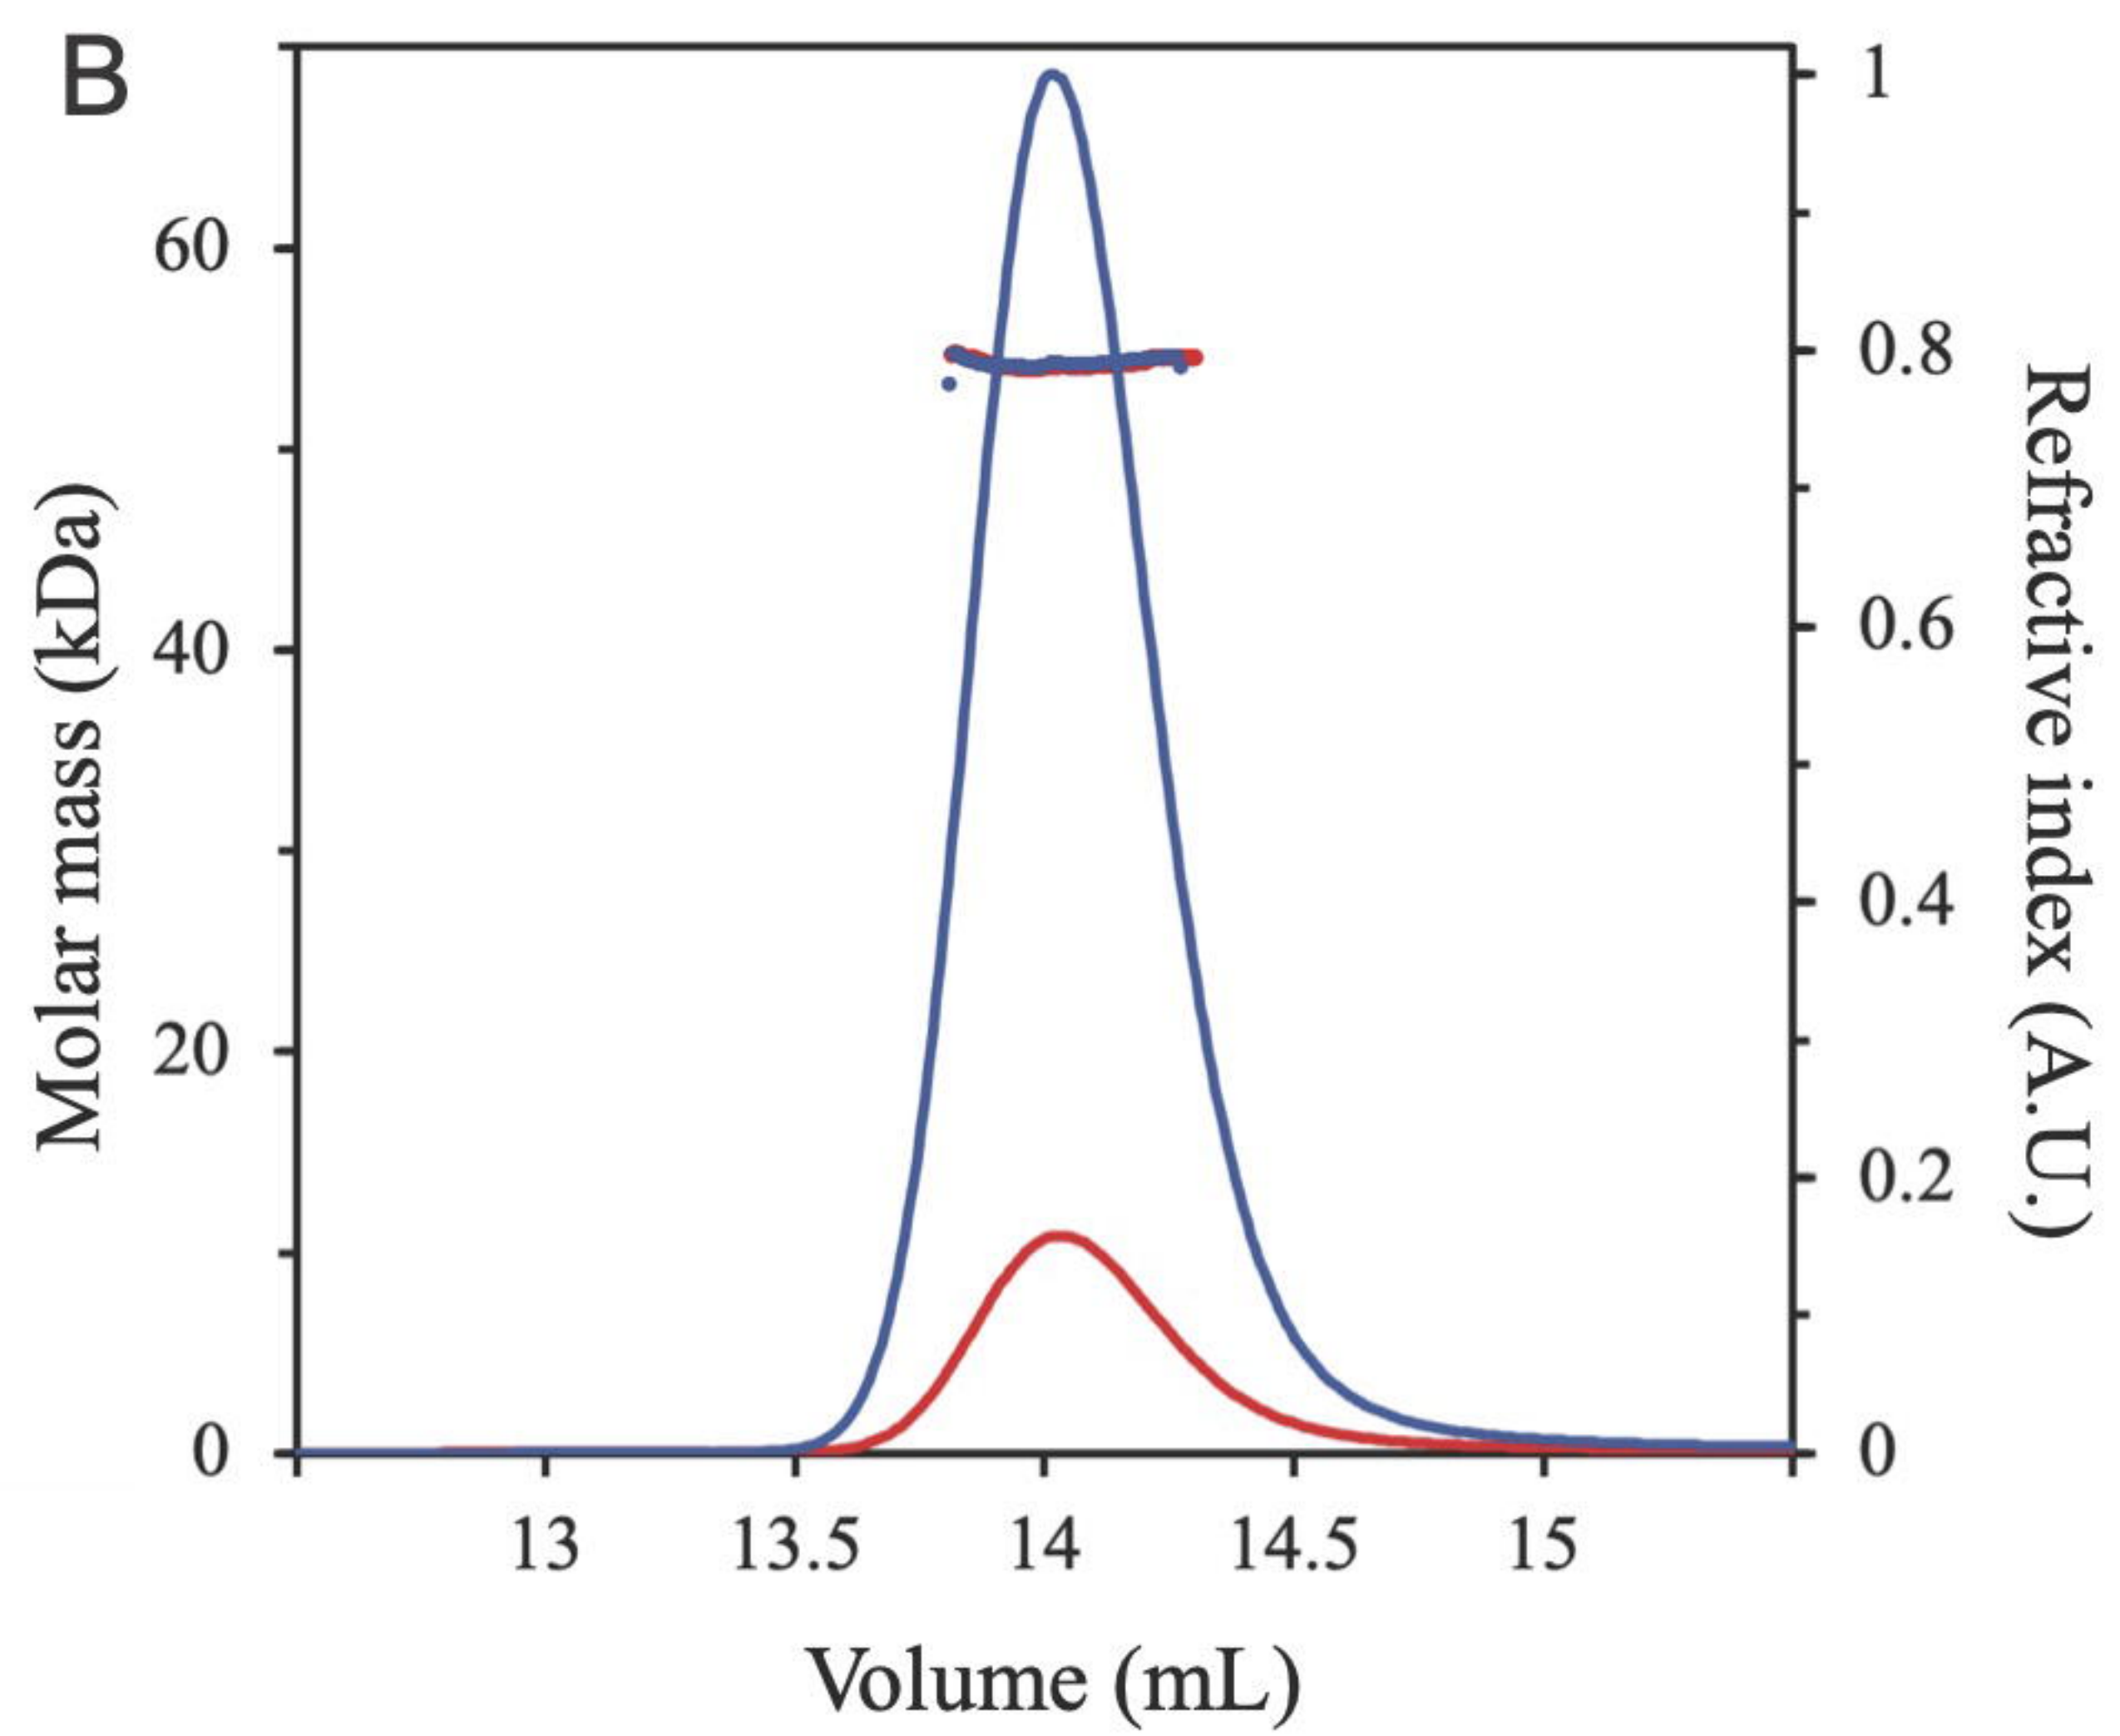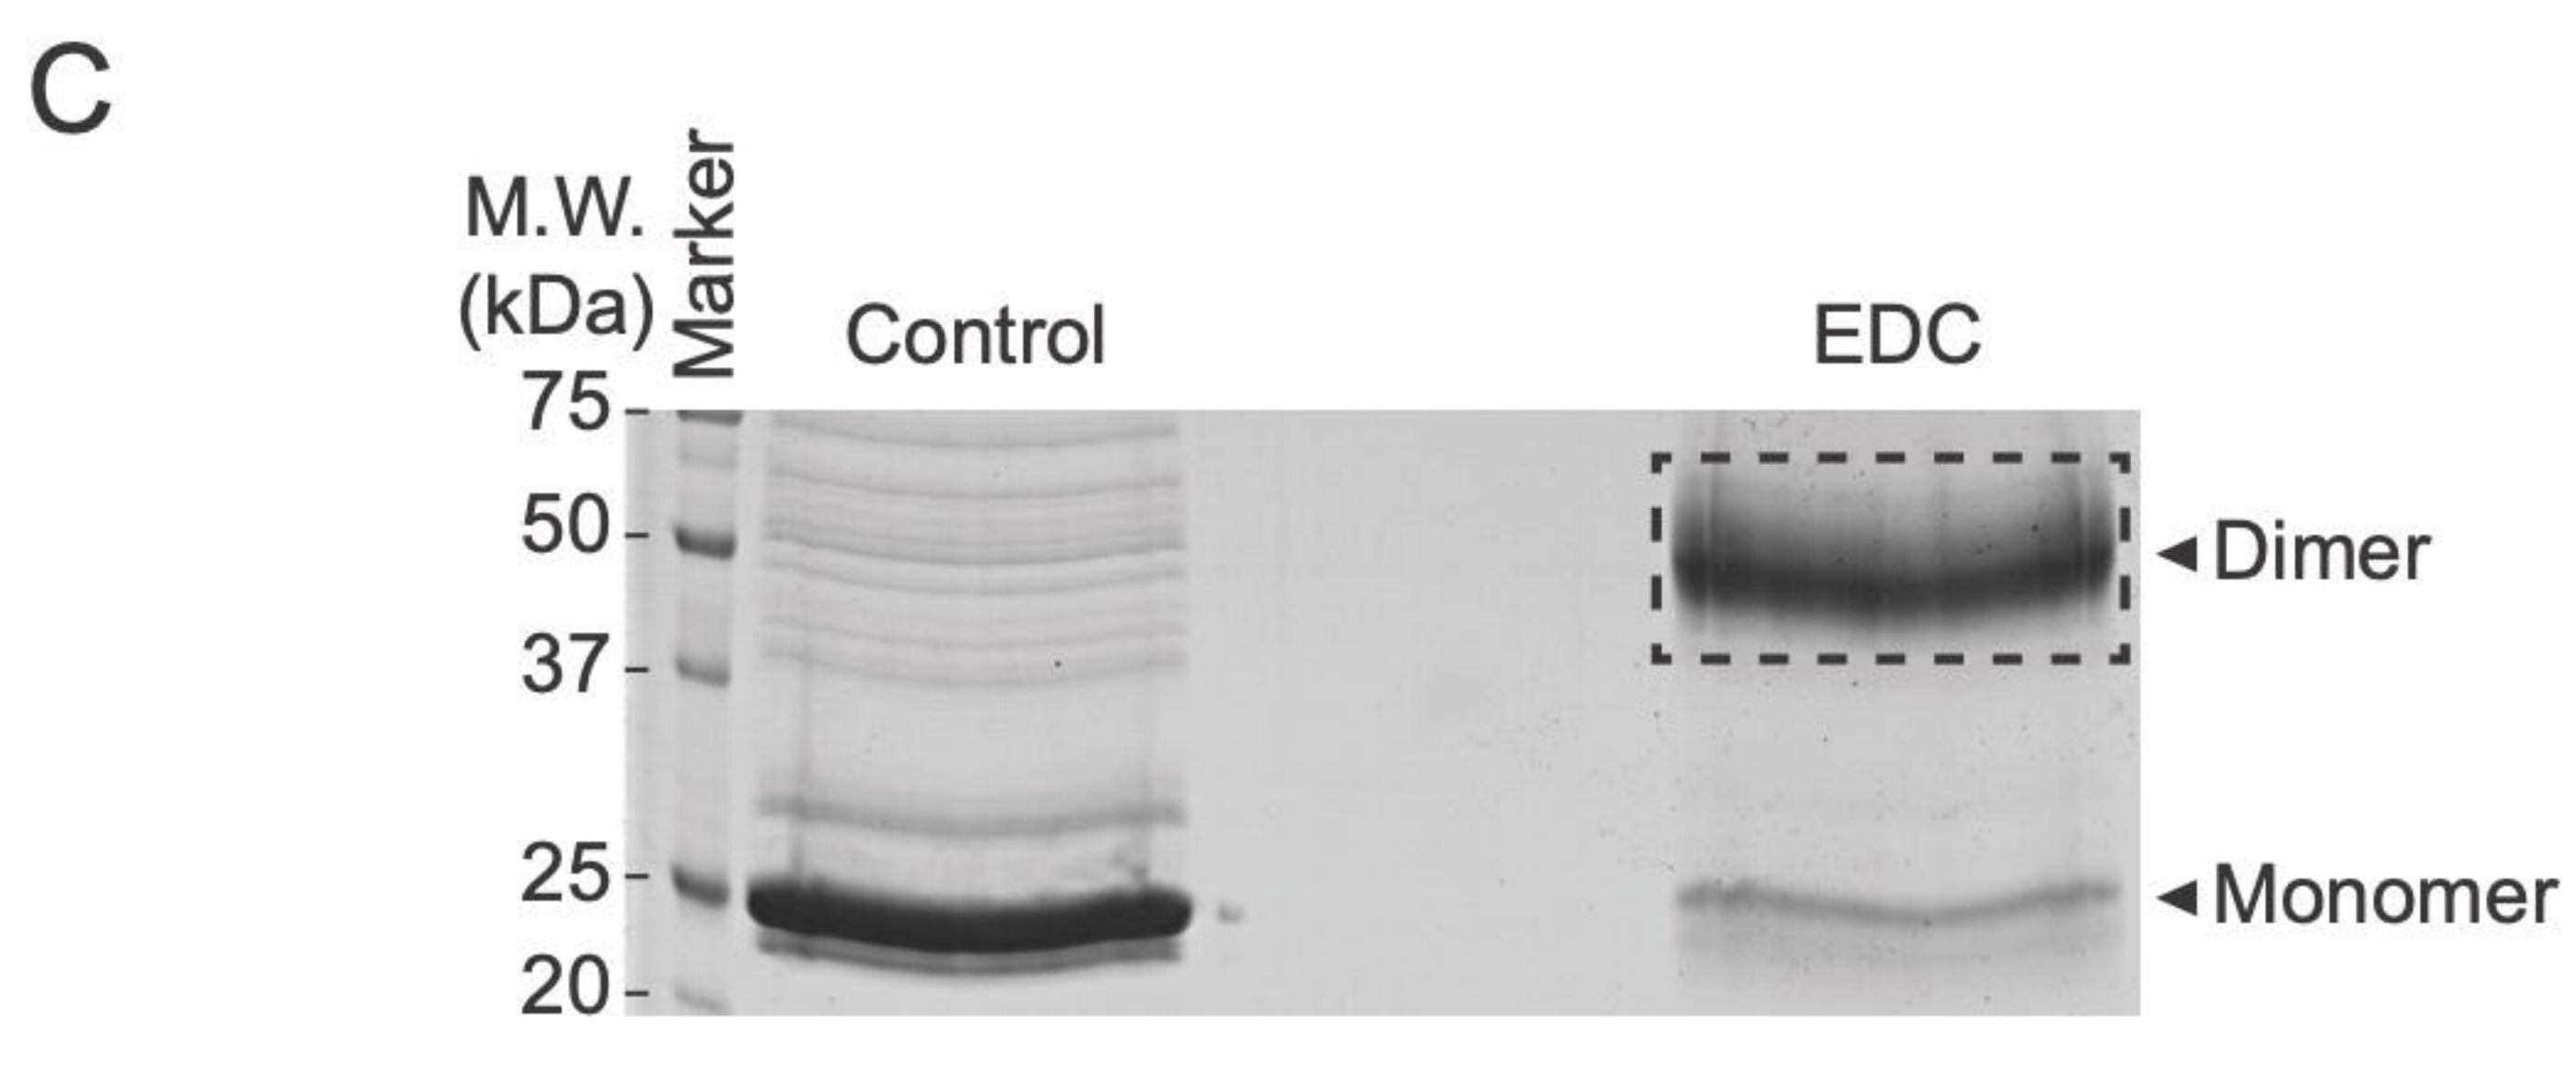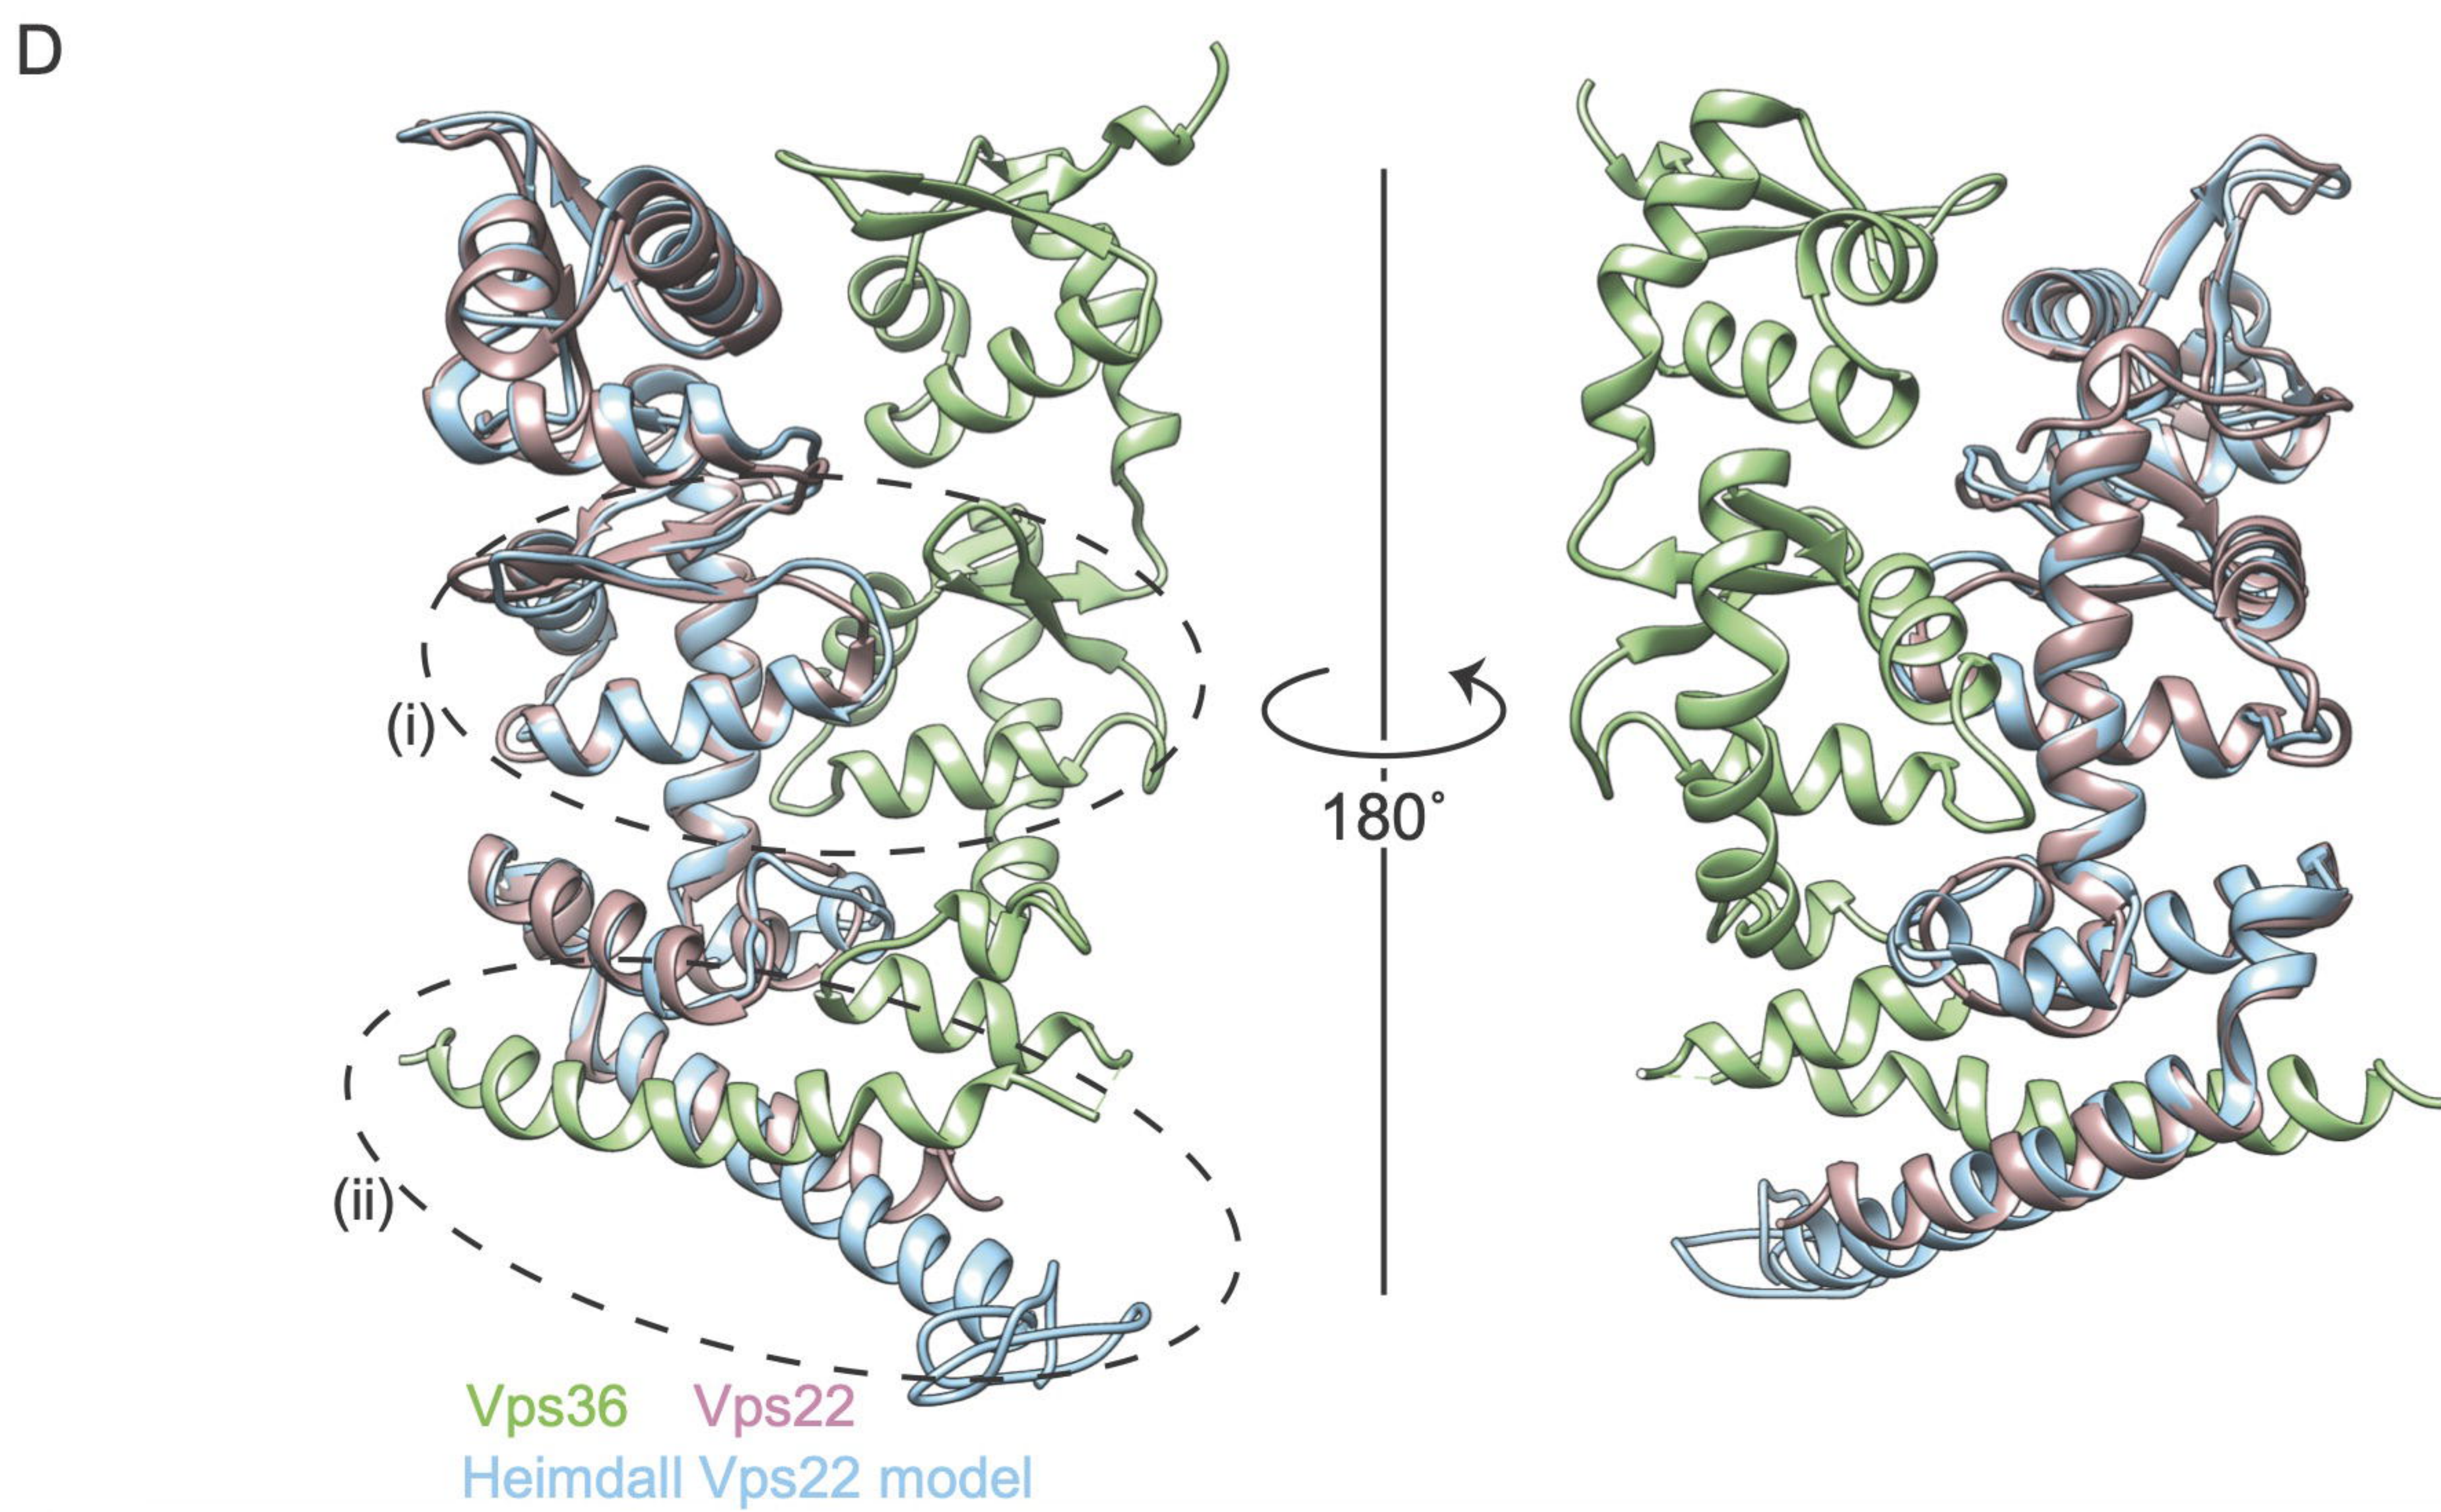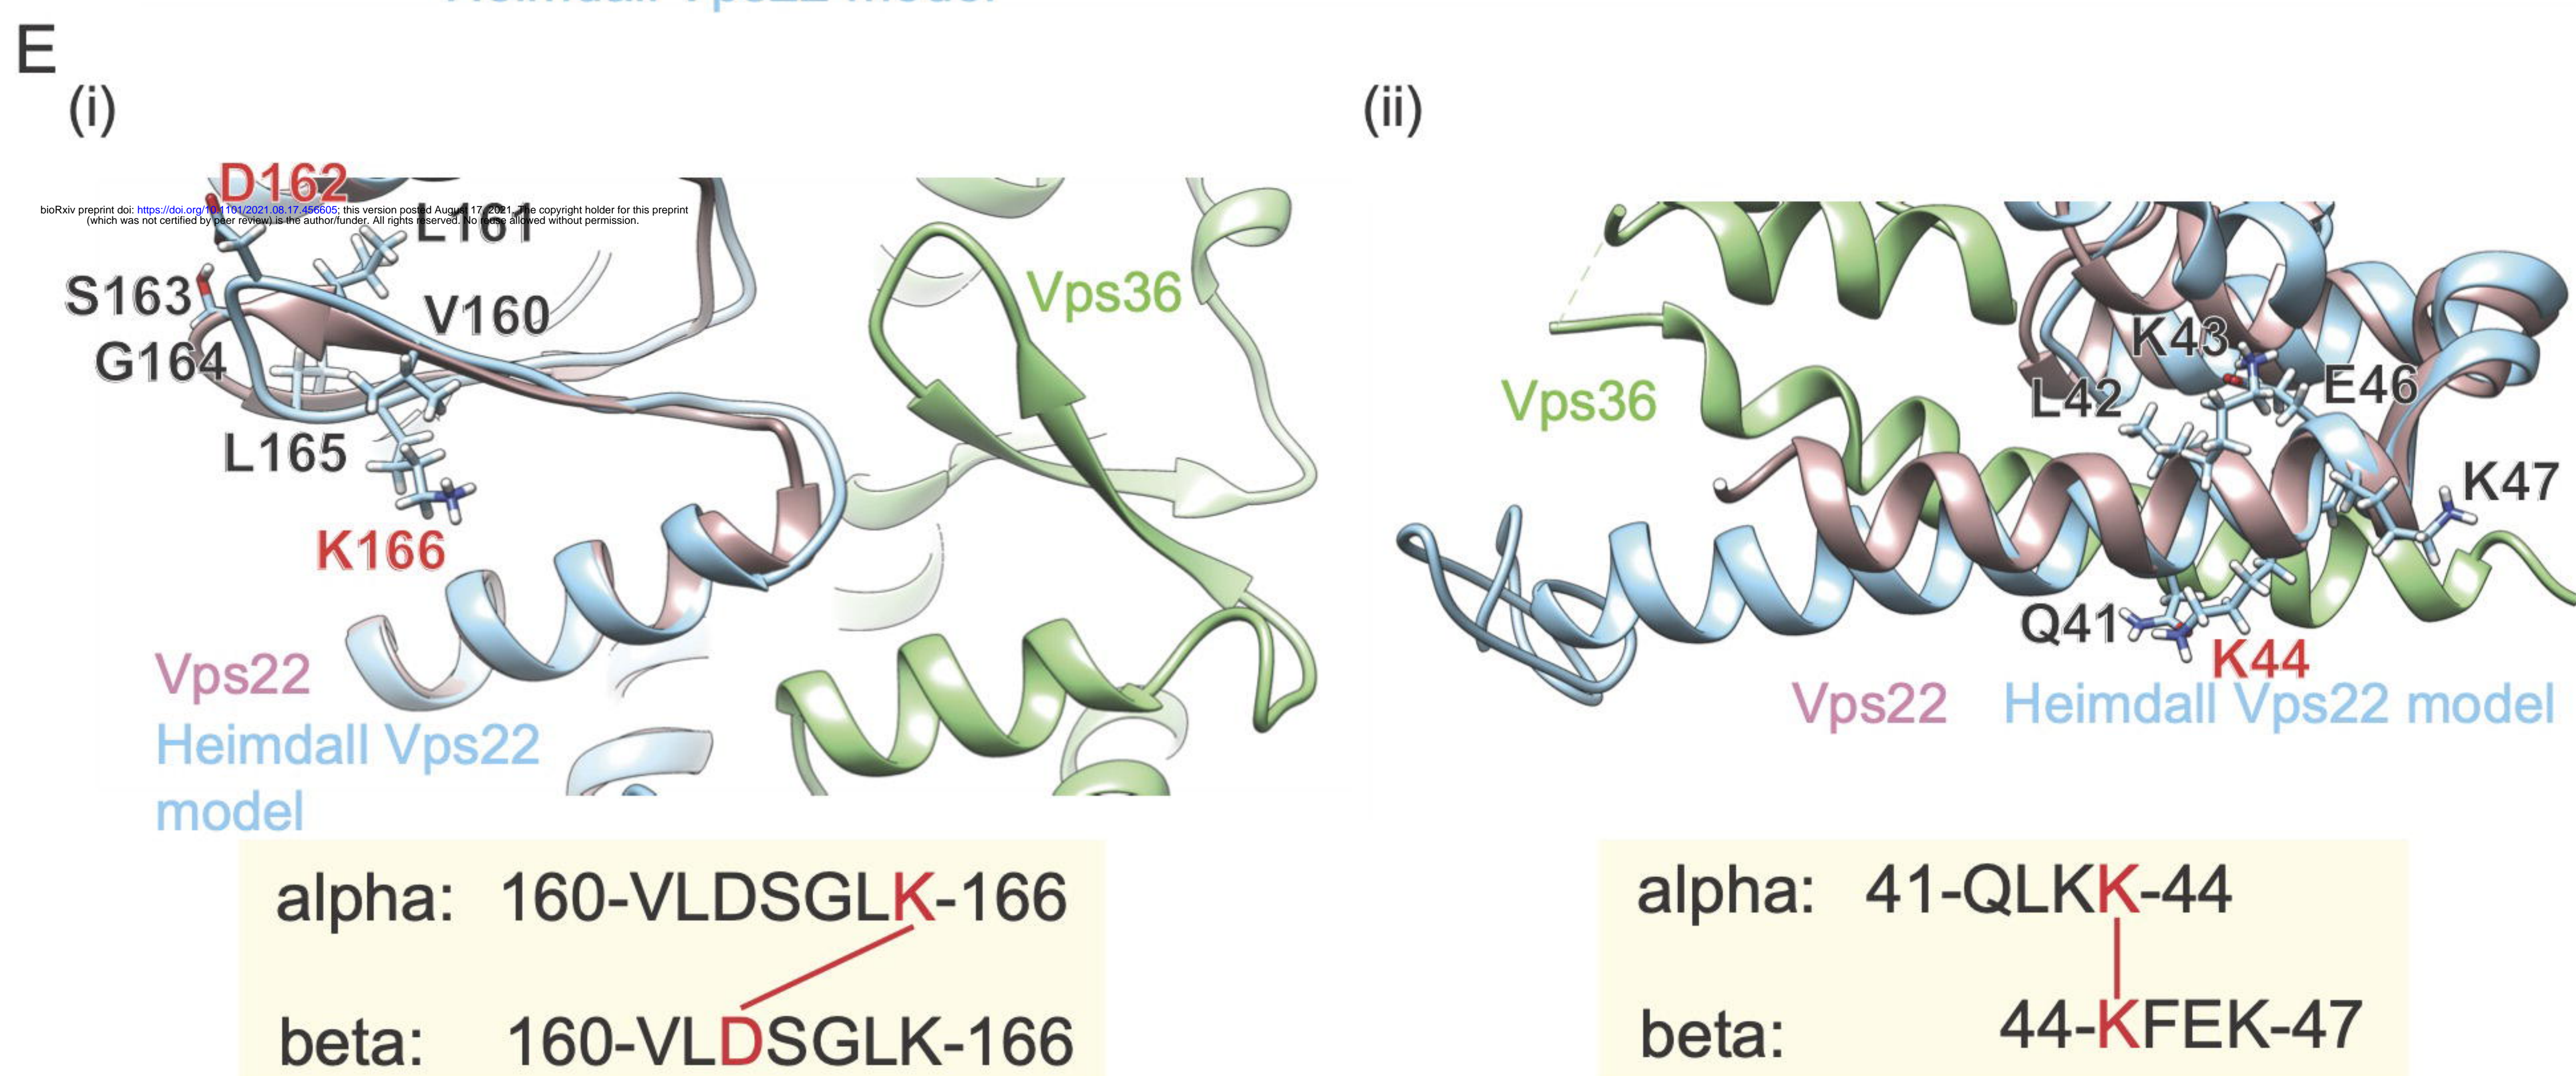

A

**Archaeal Vps25**  
(N-terminus, blue;  
C-terminus, red)

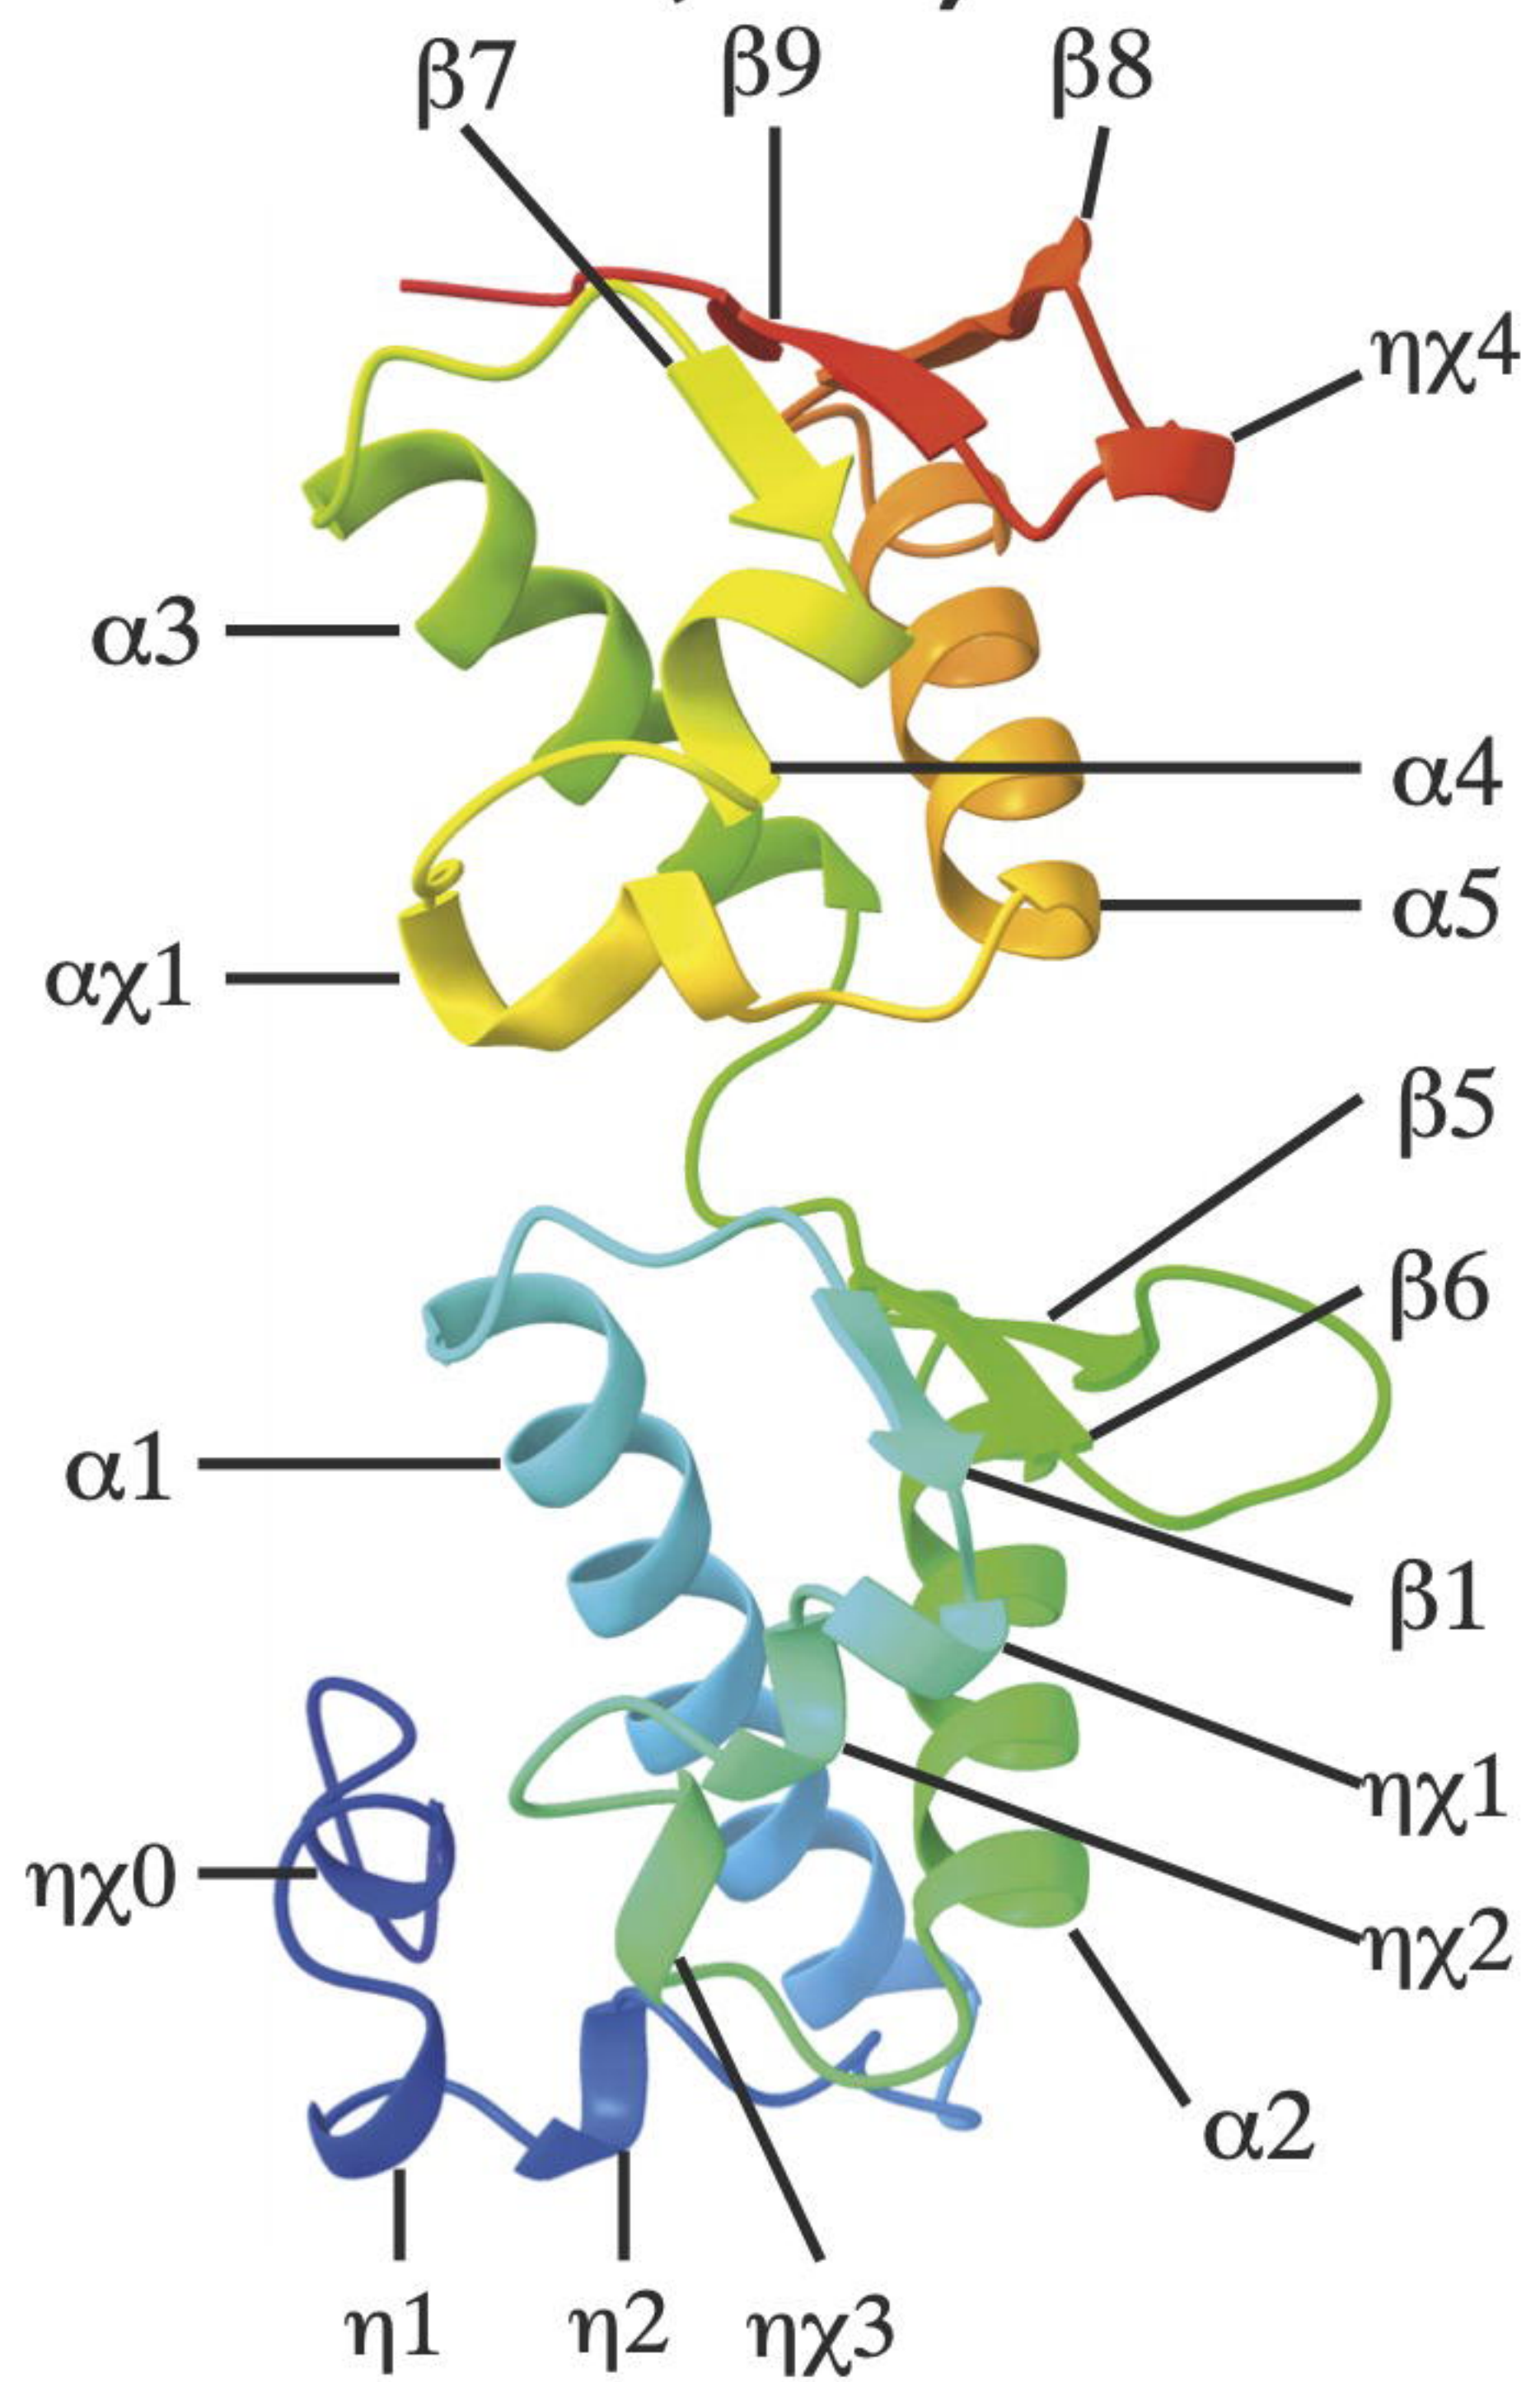

B

**Superposition of the n- (blue) and c-terminal (pink) archaeal Vps25 wH domains**

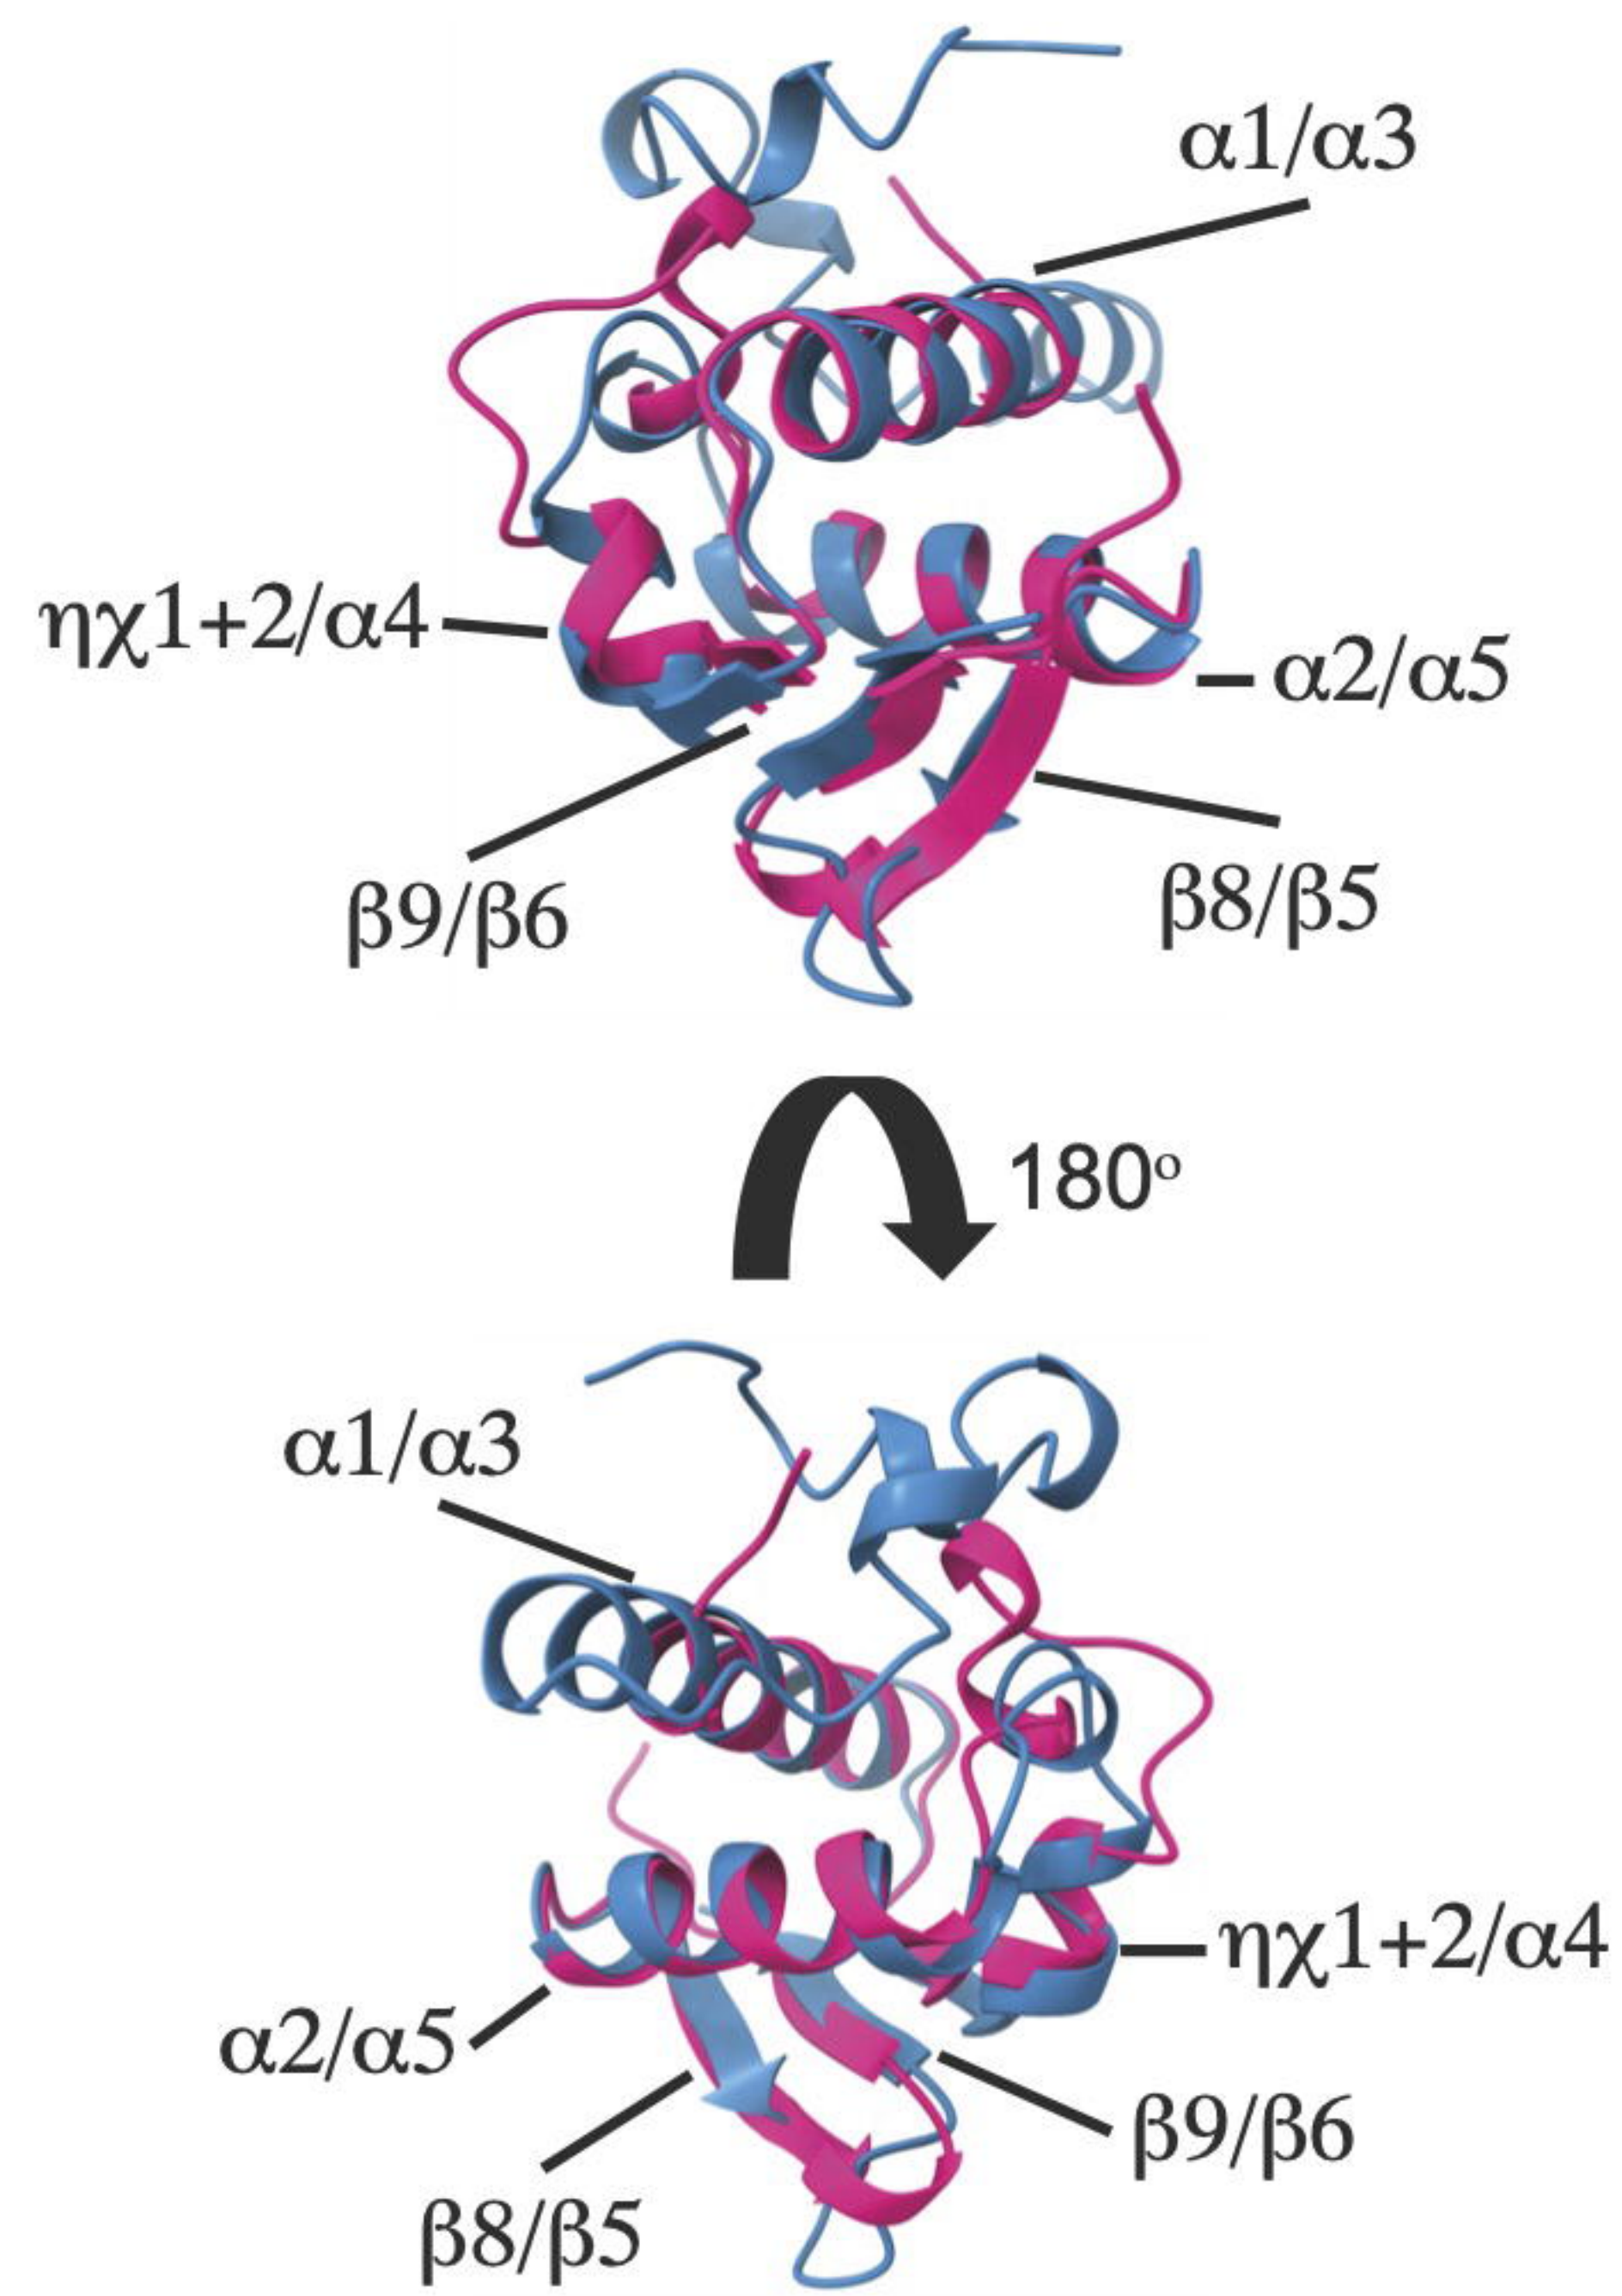

C

**Comparison of archaeal Vps25 (red) with Vps25 from *S. cerevisiae* (green) (1XB4) and *H. sapiens* (blue) (2ZME)**

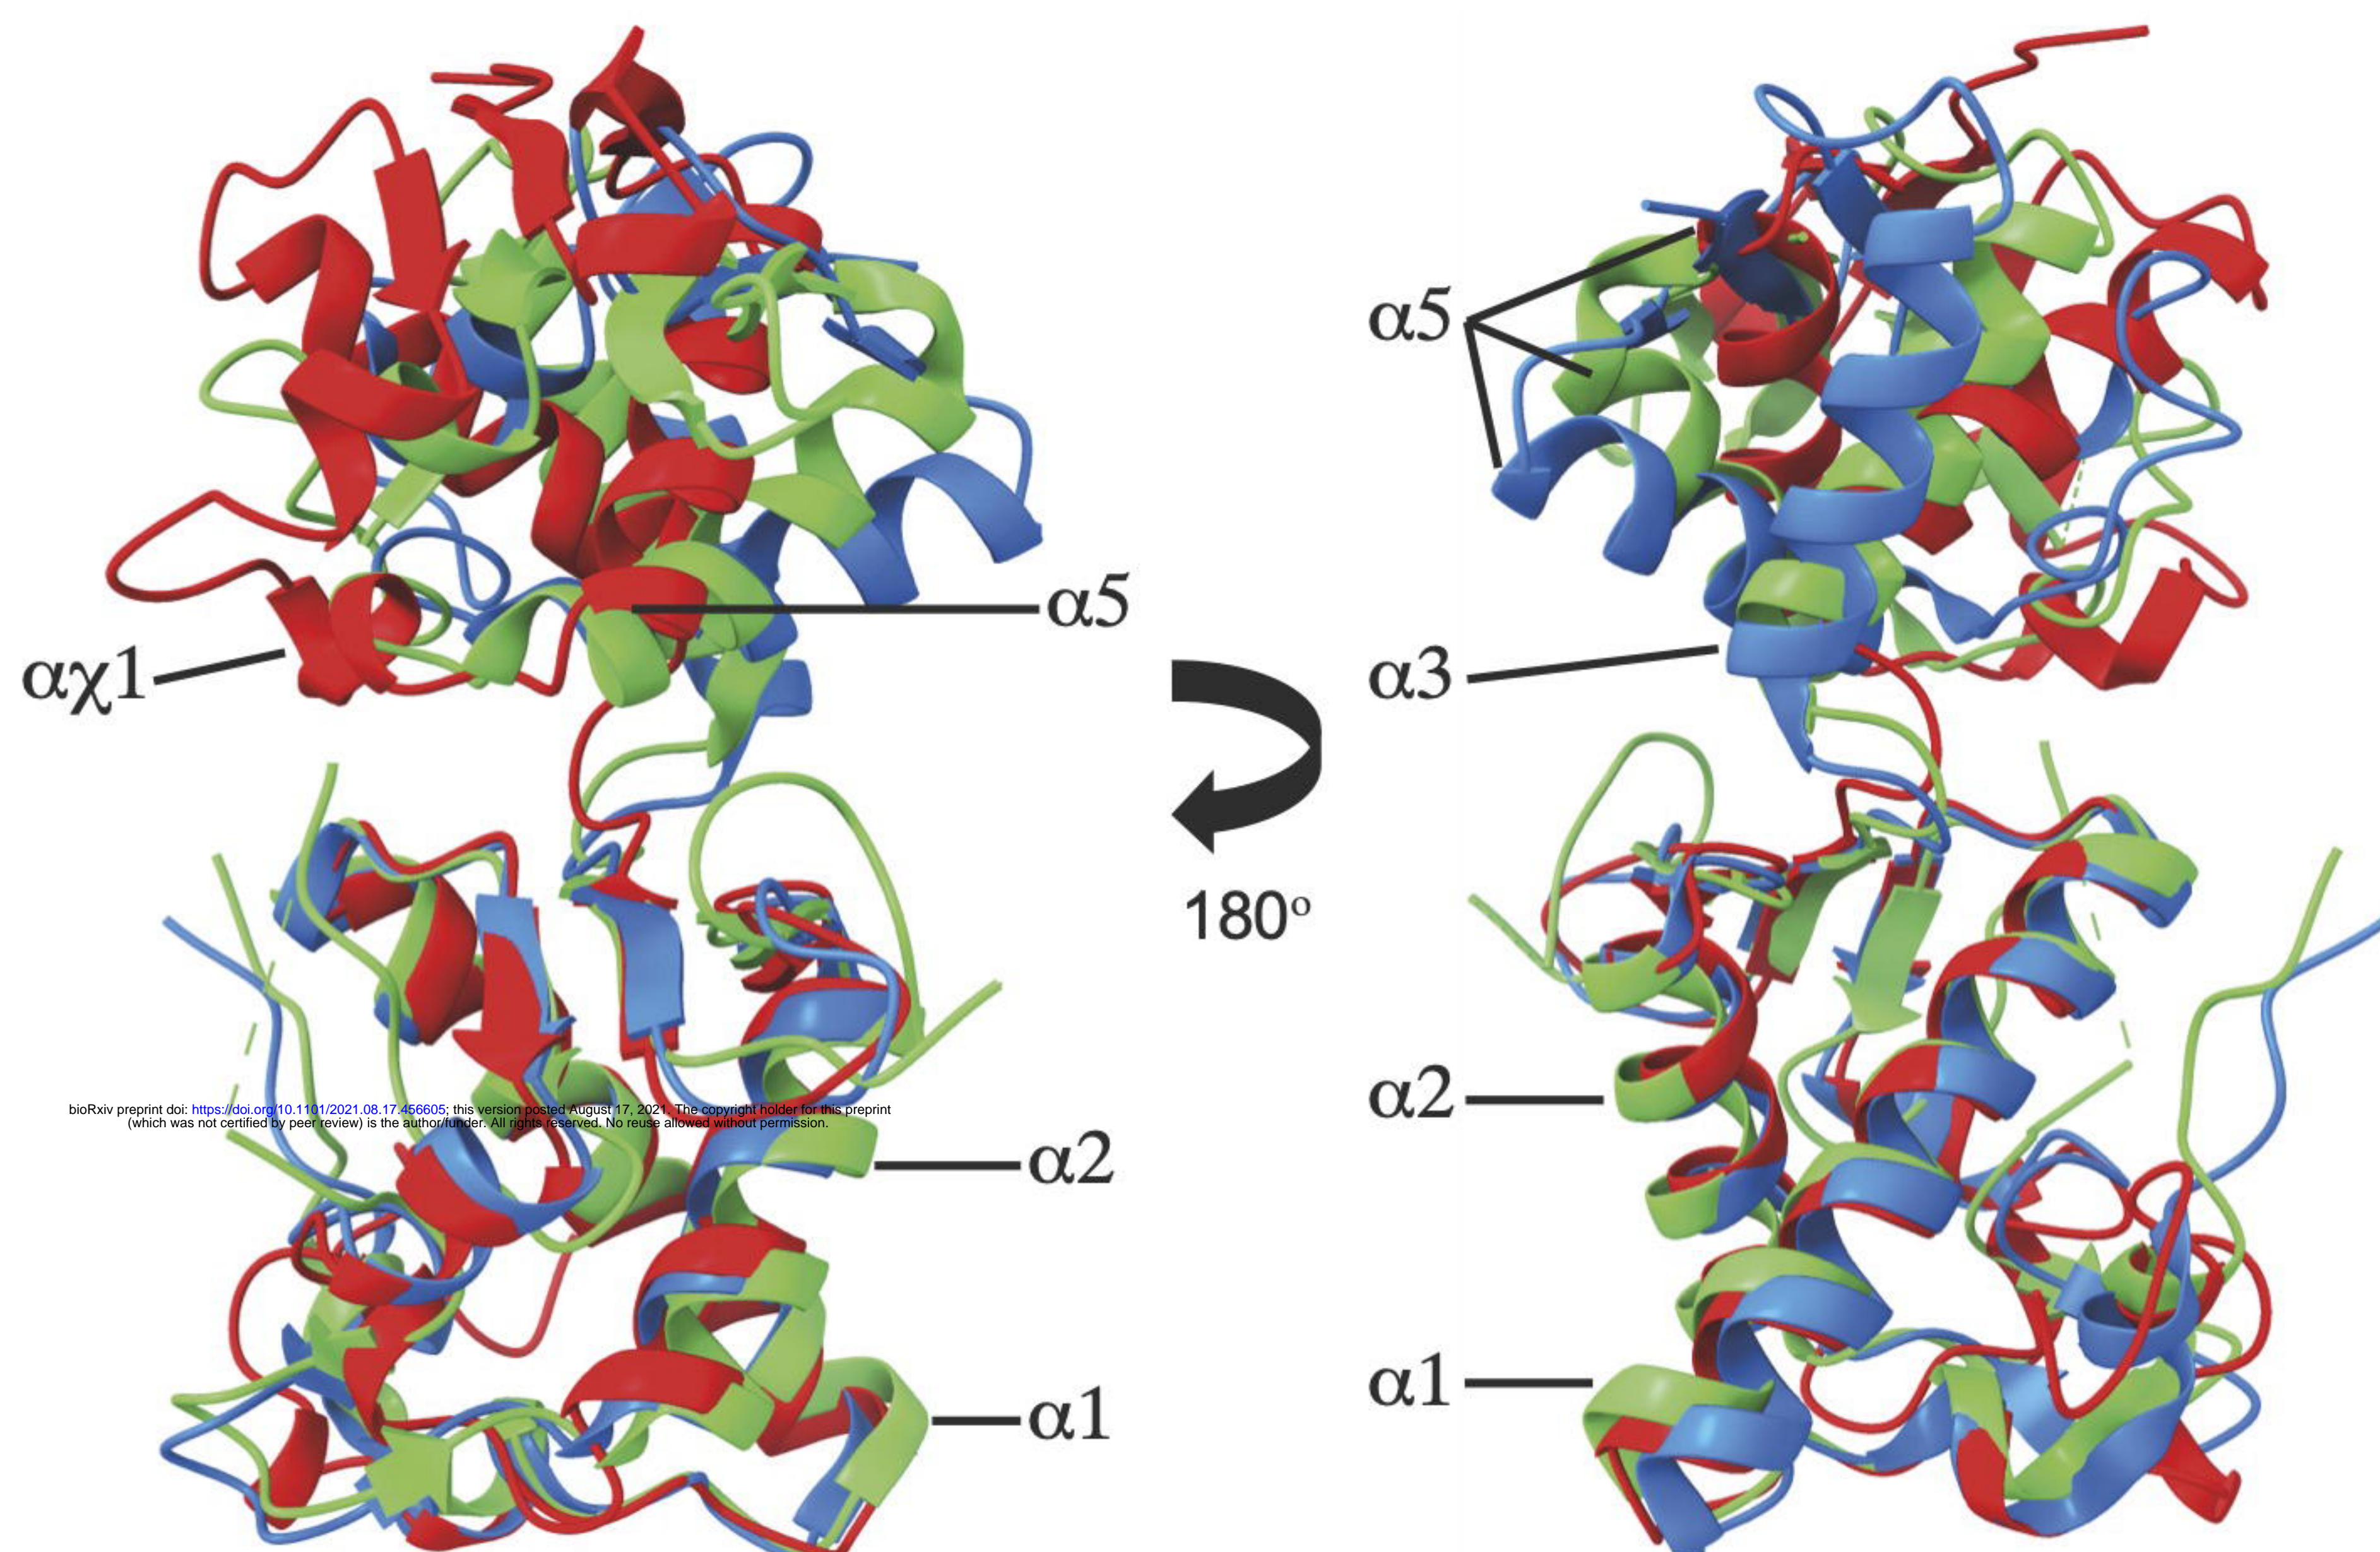

A

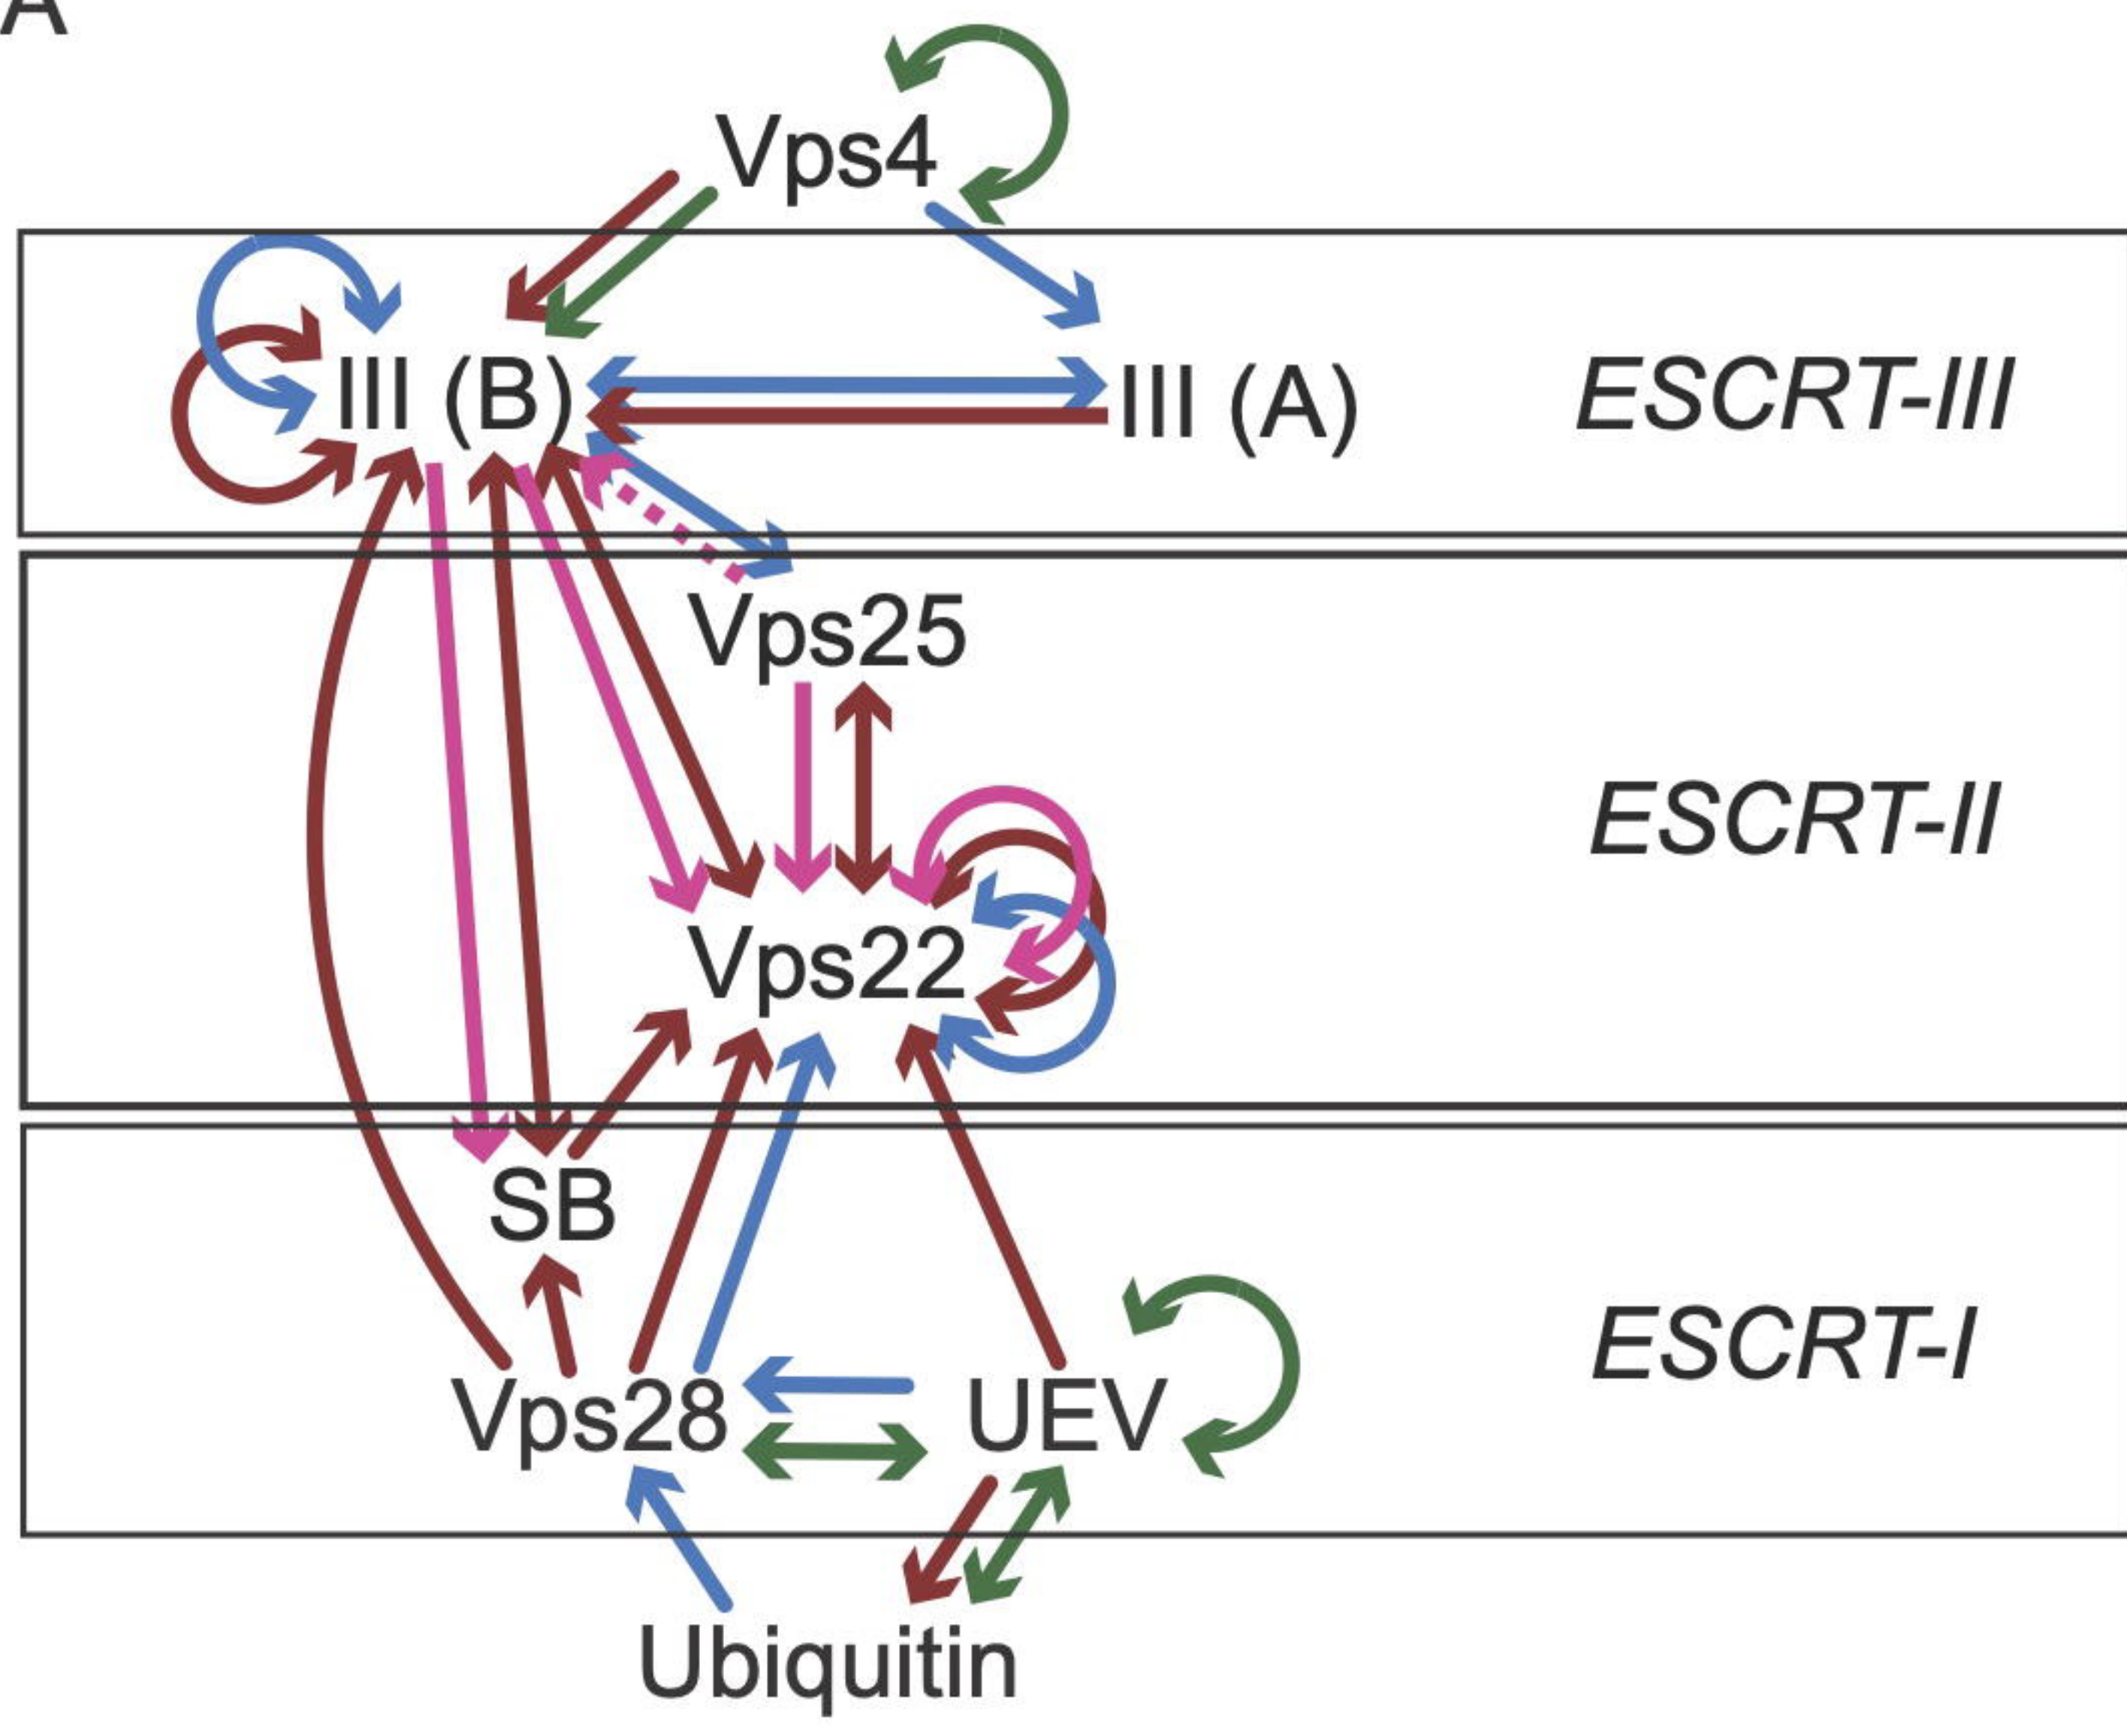

**Lokiarch ThorAB25 HeimAB125 OdinLCB4**

B

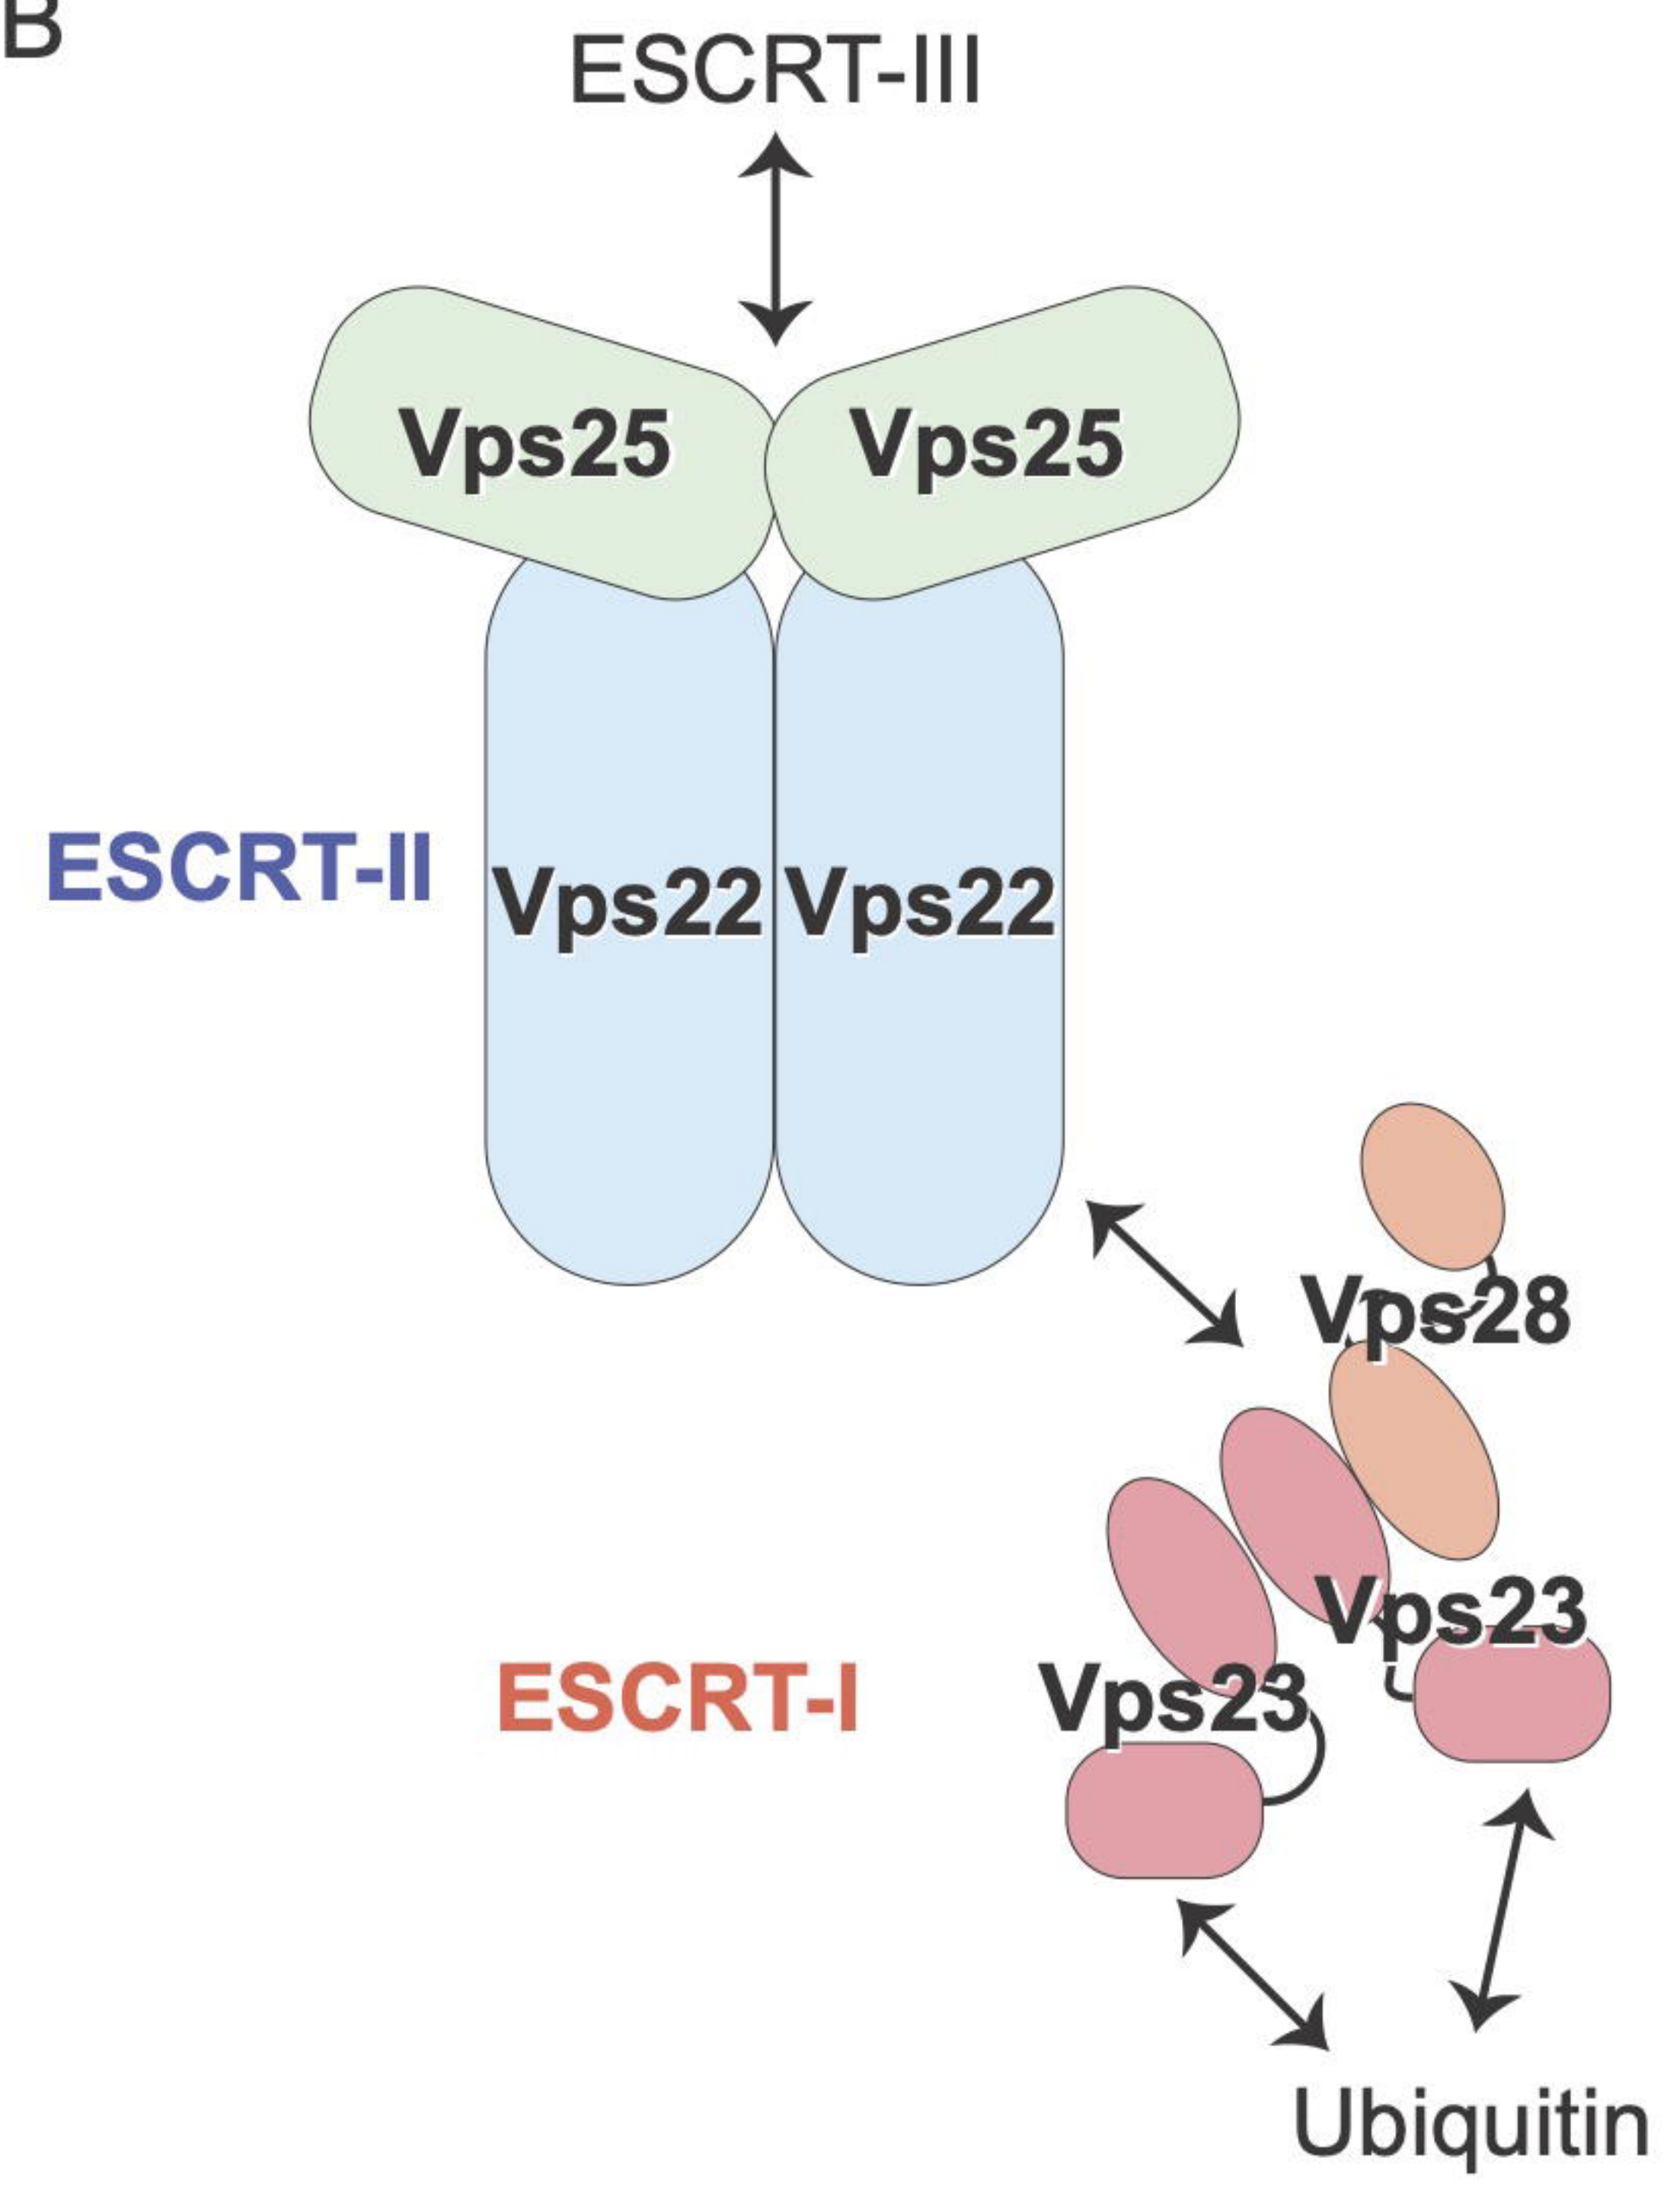

Source: https://www.biorxiv.org/content/10.1101/2021.08.17.456605v1.full.pdf
